# Supplementary material for: [1,2,4]triazolo[4,3-a]quinoxaline as Novel Scaffold in the Imiqualines Family: Candidates with Cytotoxic Activities on Melanoma Cell Lines
Source: MDPI journal article supplement (doi:10.3390/molecules28145478), 2023-07-18

## Supporting Materials

Article

### **[1,2,4]triazolo[4,3-*a*]quinoxaline as novel scaffold in the Imiquinalines family : candidates with cytotoxic activities on melanoma cell lines.**

Cindy Patinote <sup>1</sup>, Sandy Raevens <sup>1</sup>, Amélie Baumann <sup>1</sup>, Eloise Pellegrin <sup>1</sup>, Carine Deleuze-Masquéfa <sup>1</sup>, Pierre-Antoine Bonnet <sup>1,\*</sup>.

<sup>1</sup> Institut des Biomolécules Max Mousseron (IBMM), UMR 5247 F16, (CNRS, ENSCM, Université de Montpellier), 1919 route de Mende, 34090 Montpellier, France. cindy.patinote@umontpellier.fr, carine.masquefa@umontpellier.fr

\* Correspondence: pierre-antoine.bonnet@umontpellier.fr

#### Compounds descriptions

|      |                                                                                                               |    |
|------|---------------------------------------------------------------------------------------------------------------|----|
| S1.  | N-methyl-[1,2,4]triazolo[4,3- <i>a</i> ]quinoxalin-4-yl-amine ( <b>4</b> ).....                               | 3  |
| S2.  | 8-Bromo-[1,2,4]triazolo[4,3- <i>a</i> ]quinoxalin-4-yl)-methyl-amine ( <b>7</b> ).....                        | 5  |
| S3.  | [8-(3,4-Dimethoxy-phenyl)-[1,2,4]triazolo[4,3- <i>a</i> ]quinoxalin-4-yl]-methyl-amine ( <b>8a</b> ). ....    | 8  |
| S4.  | [8-(3-Methoxy-phenyl)-[1,2,4]triazolo[4,3- <i>a</i> ]quinoxalin-4-yl]-methyl-amine ( <b>8b</b> ). ....        | 10 |
| S5.  | Methyl-(8-phenyl-[1,2,4]triazolo[4,3- <i>a</i> ]quinoxalin-4-yl)-amine ( <b>8c</b> ).....                     | 13 |
| S6.  | Methyl-[8-(3,4,5-trimethoxy-phenyl)-[1,2,4]triazolo[4,3- <i>a</i> ]quinoxalin-4-yl]-amine ( <b>8d</b> ). .... | 15 |
| S7.  | 2-chloro-3-(2-(3,4-dimethoxybenzylidene)hydrazinyl)quinoxaline ( <b>14a</b> ). ....                           | 17 |
| S8.  | 2-chloro-3-(2-(3-methoxybenzylidene)hydrazinyl)quinoxaline ( <b>14b</b> ). ....                               | 19 |
| S9.  | 2-(2-benzylidenehydrazinyl)-3-chloroquinoxaline ( <b>14c</b> ). ....                                          | 21 |
| S10. | 2-chloro-3-(2-(3,4,5-trimethoxybenzylidene)hydrazinyl)quinoxaline ( <b>14d</b> ). ....                        | 23 |
| S11. | 2-chloro-3-(2-(pyridin-3-ylmethylene)hydrazinyl)quinoxaline ( <b>14e</b> ). ....                              | 25 |
| S12. | 2-chloro-3-(2-(3-phenylpropylidene)hydrazinyl)quinoxaline ( <b>14f</b> ). ....                                | 27 |
| S13. | 2-chloro-3-(2-pentylidenehydrazinyl)quinoxaline ( <b>14g</b> ). ....                                          | 29 |
| S14. | 2-chloro-3-(2-(3-methylbutylidene)hydrazinyl)quinoxaline ( <b>14h</b> ). ....                                 | 31 |
| S15. | 2-chloro-3-(2-ethylidenehydrazinyl)quinoxaline ( <b>14i</b> ). ....                                           | 33 |
| S16. | 4-chloro-1-(3,4-dimethoxyphenyl)-[1,2,4]triazolo[4,3- <i>a</i> ]quinoxaline ( <b>15a</b> ). ....              | 34 |
| S17. | 4-chloro-1-(3-methoxyphenyl)-[1,2,4]triazolo[4,3- <i>a</i> ]quinoxaline ( <b>15b</b> ). ....                  | 36 |
| S18. | 4-chloro-1-phenyl-[1,2,4]triazolo[4,3- <i>a</i> ]quinoxaline ( <b>15c</b> ).....                              | 38 |
| S19. | 4-chloro-1-(3,4,5-trimethoxyphenyl)-[1,2,4]triazolo[4,3- <i>a</i> ]quinoxaline ( <b>15d</b> ). ....           | 40 |

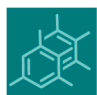

|      |                                                                                                    |    |
|------|----------------------------------------------------------------------------------------------------|----|
| S20. | 4-chloro-1-(pyridin-3-yl)-[1,2,4]triazolo[4,3-a]quinoxaline ( <b>15e</b> ). .....                  | 42 |
| S21. | 4-chloro-1-phenethyl-[1,2,4]triazolo[4,3-a]quinoxaline ( <b>15f</b> ). .....                       | 44 |
| S22. | 1-butyl-4-chloro-[1,2,4]triazolo[4,3-a]quinoxaline ( <b>15g</b> ). .....                           | 46 |
| S23. | 4-chloro-1-isobutyl-[1,2,4]triazolo[4,3-a]quinoxaline ( <b>15h</b> ). .....                        | 48 |
| S24. | 4-chloro-1-methyl-[1,2,4]triazolo[4,3-a]quinoxaline ( <b>15i</b> ). .....                          | 50 |
| S25. | 1-(3,4-dimethoxyphenyl)-N-methyl-[1,2,4]triazolo[4,3-a]quinoxalin-4-amine ( <b>16a</b> ). .....    | 52 |
| S26. | 1-(3-methoxyphenyl)-N-methyl-[1,2,4]triazolo[4,3-a]quinoxalin-4-amine ( <b>16b</b> ). .....        | 56 |
| S27. | N-methyl-1-phenyl-[1,2,4]triazolo[4,3-a]quinoxalin-4-amine ( <b>16c</b> ). .....                   | 59 |
| S28. | N-methyl-1-(3,4,5-trimethoxyphenyl)-[1,2,4]triazolo[4,3-a]quinoxalin-4-amine ( <b>16d</b> ). ..... | 62 |
| S29. | N-methyl-1-(pyridin-3-yl)-[1,2,4]triazolo[4,3-a]quinoxalin-4-amine ( <b>16e</b> ). .....           | 65 |
| S30. | N-methyl-1-phenethyl-[1,2,4]triazolo[4,3-a]quinoxalin-4-amine ( <b>16f</b> ). .....                | 68 |
| S31. | 1-butyl-N-methyl-[1,2,4]triazolo[4,3-a]quinoxalin-4-amine ( <b>16g</b> ). .....                    | 71 |
| S32. | 1-isobutyl-N-methyl-[1,2,4]triazolo[4,3-a]quinoxalin-4-amine ( <b>16h</b> ). .....                 | 74 |
| S33. | N,1-dimethyl-[1,2,4]triazolo[4,3-a]quinoxalin-4-amine ( <b>16i</b> ). .....                        | 77 |
| S34. | 1-(3,4-dimethoxyphenyl)-[1,2,4]triazolo[4,3-a]quinoxalin-4-amine ( <b>16j</b> ). .....             | 80 |
| S35. | 4-(4-(methylamino)-[1,2,4]triazolo[4,3-a]quinoxalin-1-yl)benzene-1,2-diol ( <b>17a</b> ). .....    | 83 |



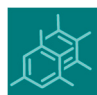

S1. *N*-methyl-[1,2,4]triazolo[4,3-*a*]quinoxalin-4-yl-amine (4).

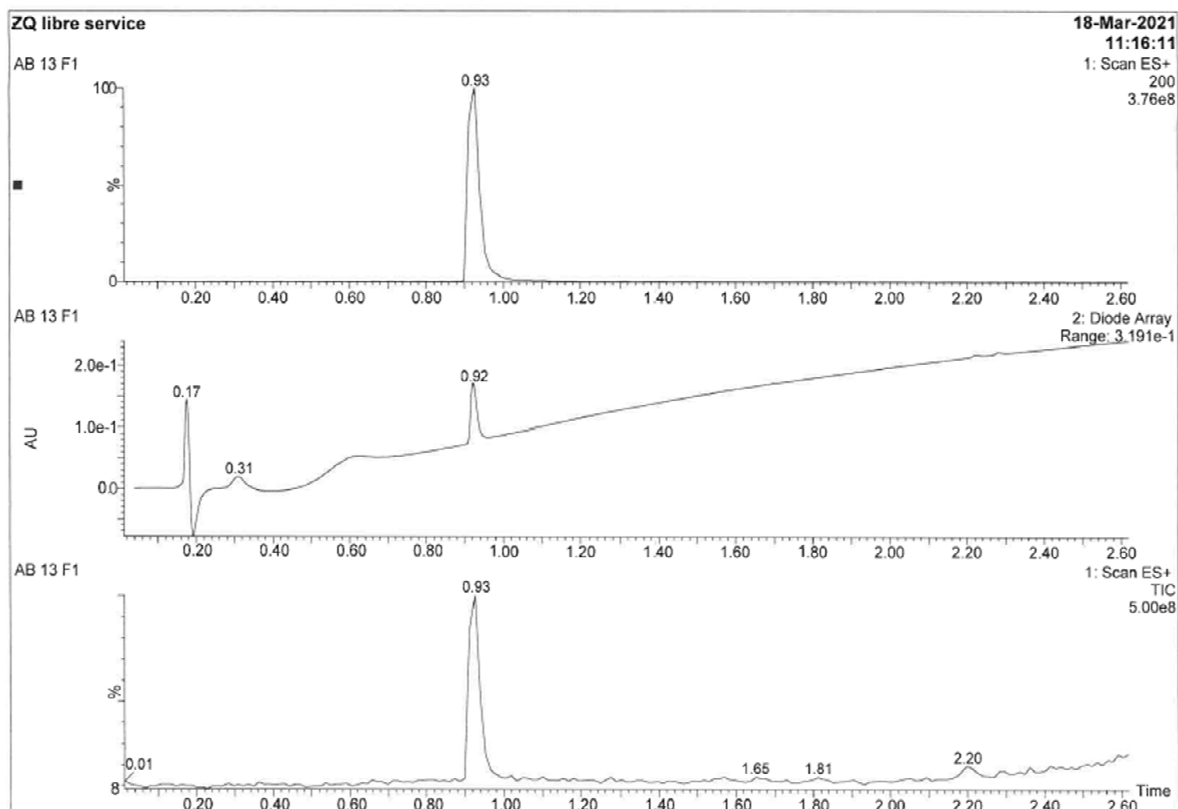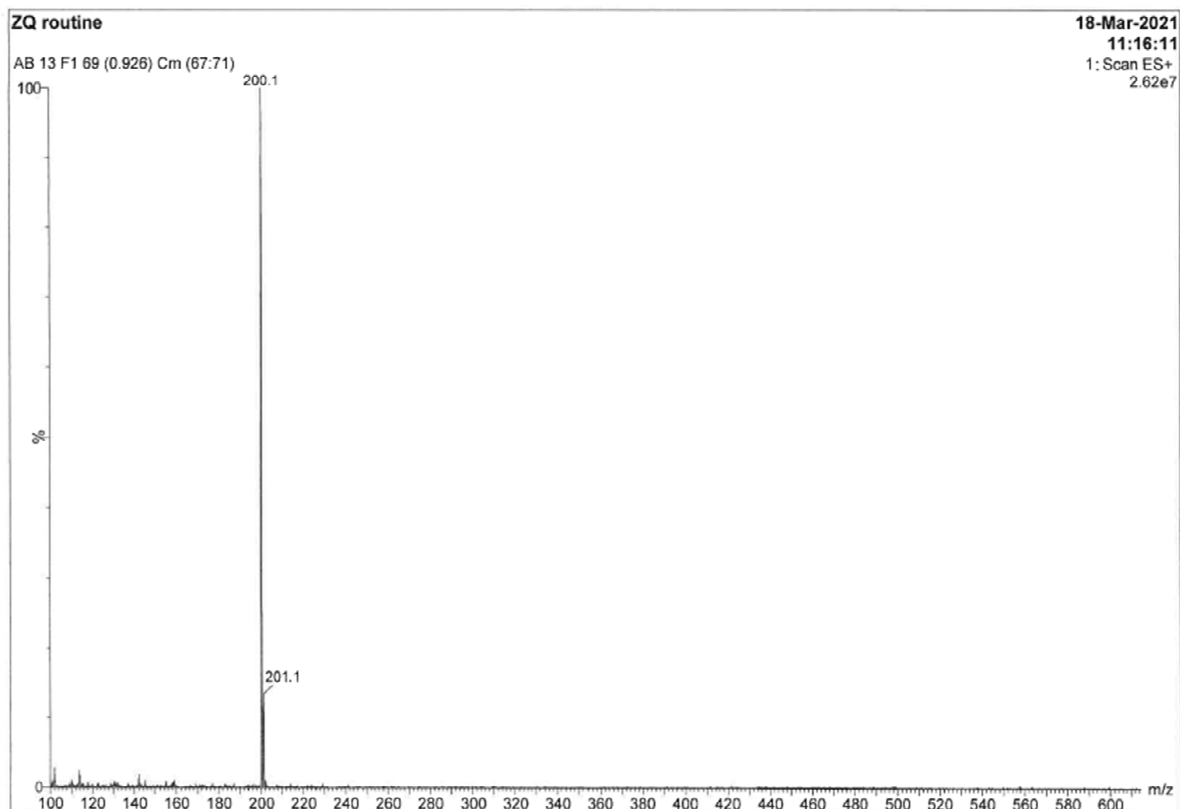

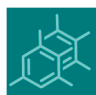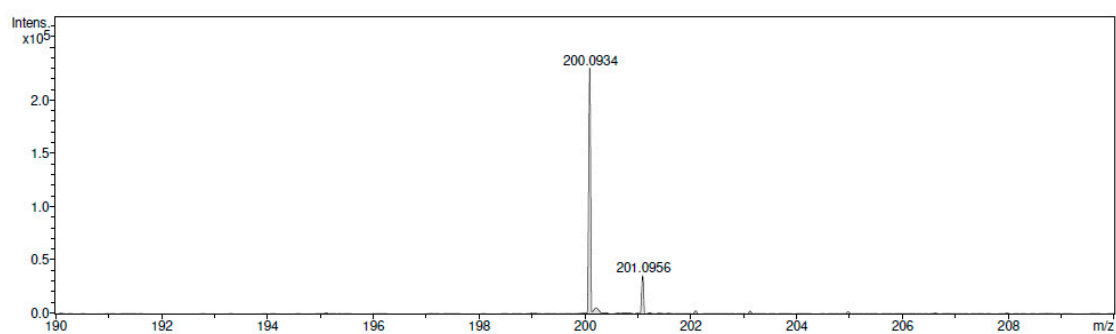

| Meas. m/z | # | Ion Formula | m/z      | err [ppm] | mSigma | # Sigma | Score  | rdB | e <sup>-</sup> | Conf | N-Rule |
|-----------|---|-------------|----------|-----------|--------|---------|--------|-----|----------------|------|--------|
| 200.0934  | 1 | C10H10N5    | 200.0931 | 1.5       | 16.3   | 1       | 100.00 | 8.5 | even           |      | ok     |

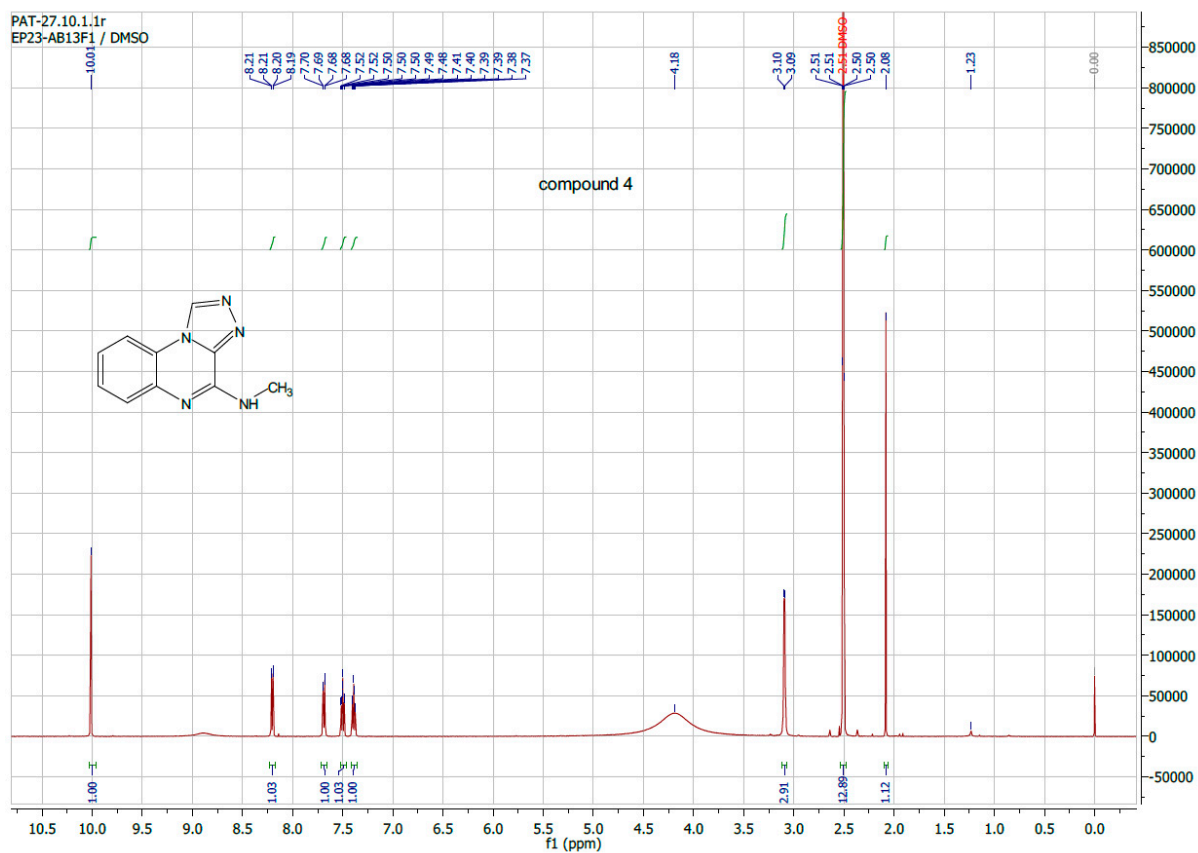

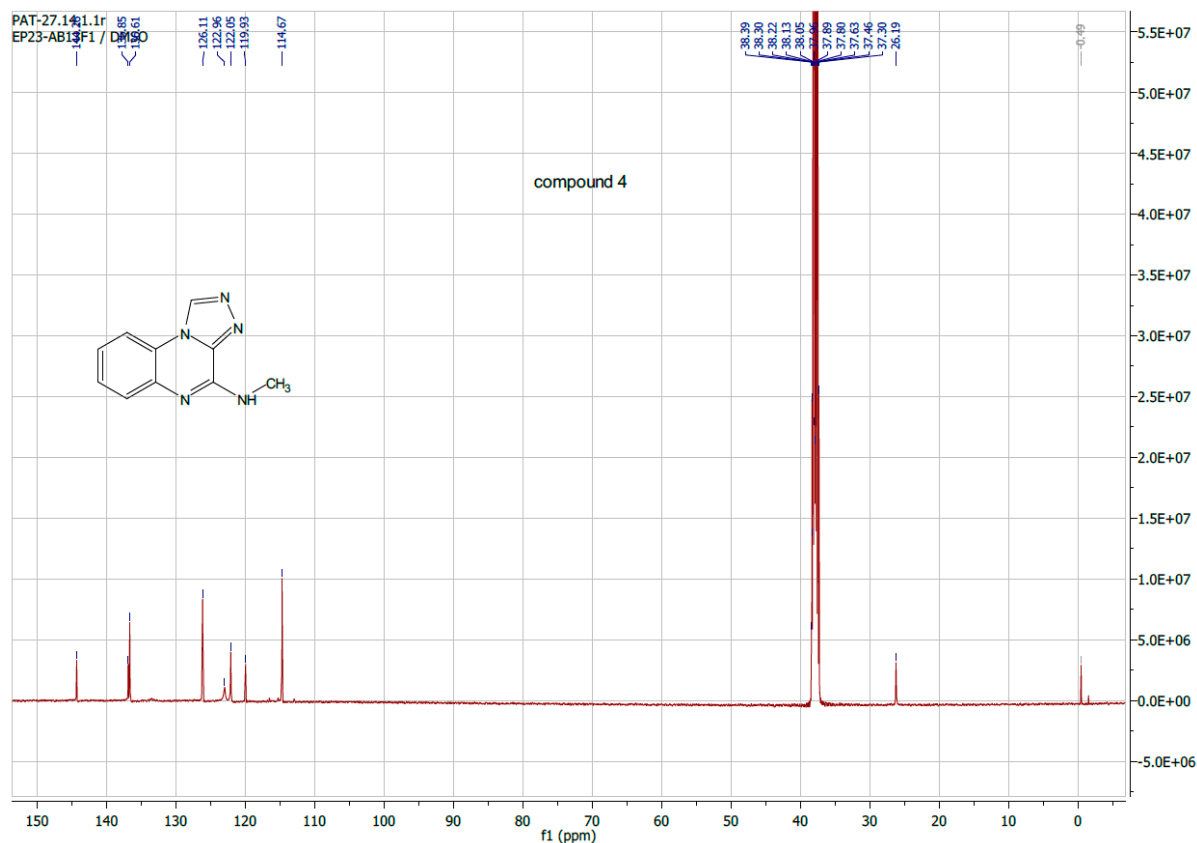

S2. 8-Bromo-[1,2,4]triazolo[4,3-a]quinoxalin-4-yl)-methyl-amine (**7**).

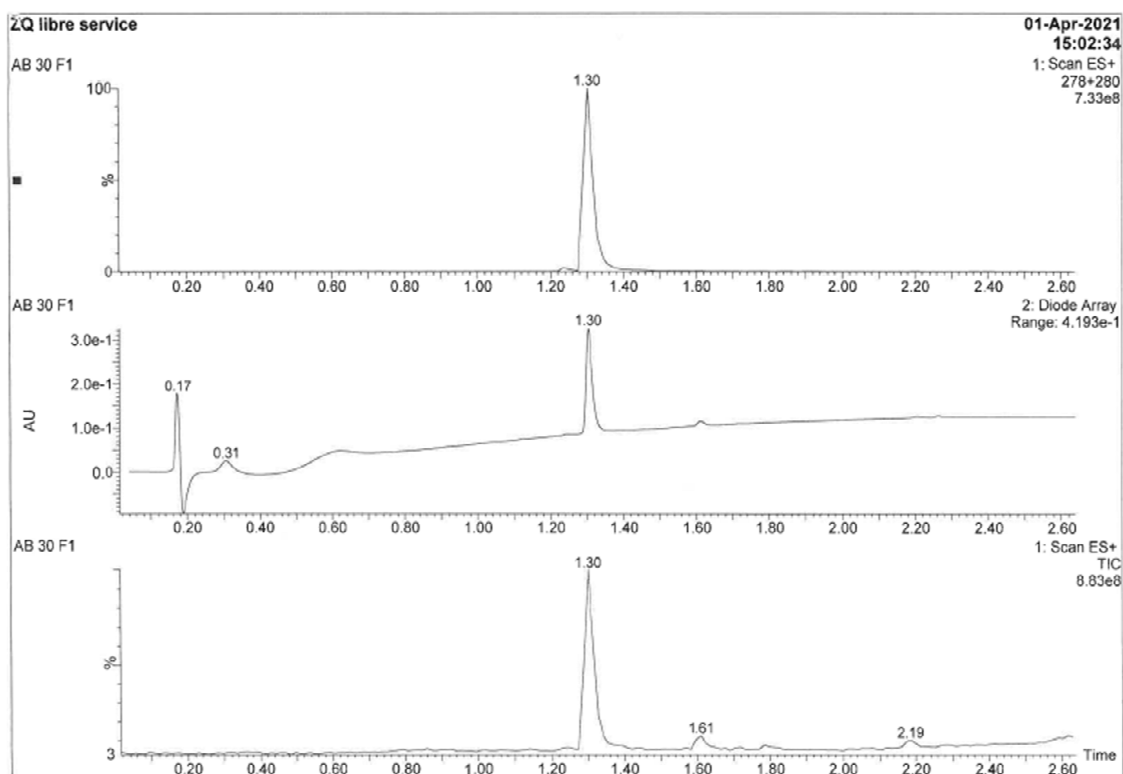

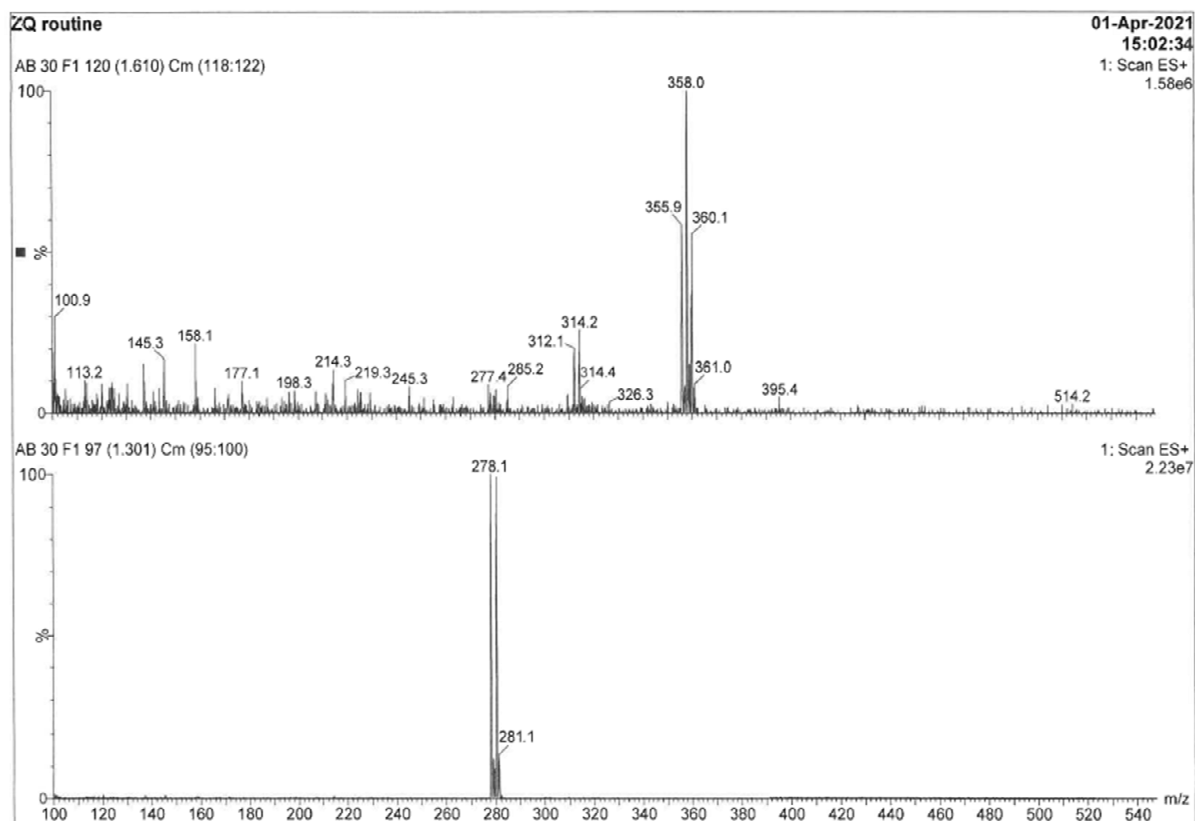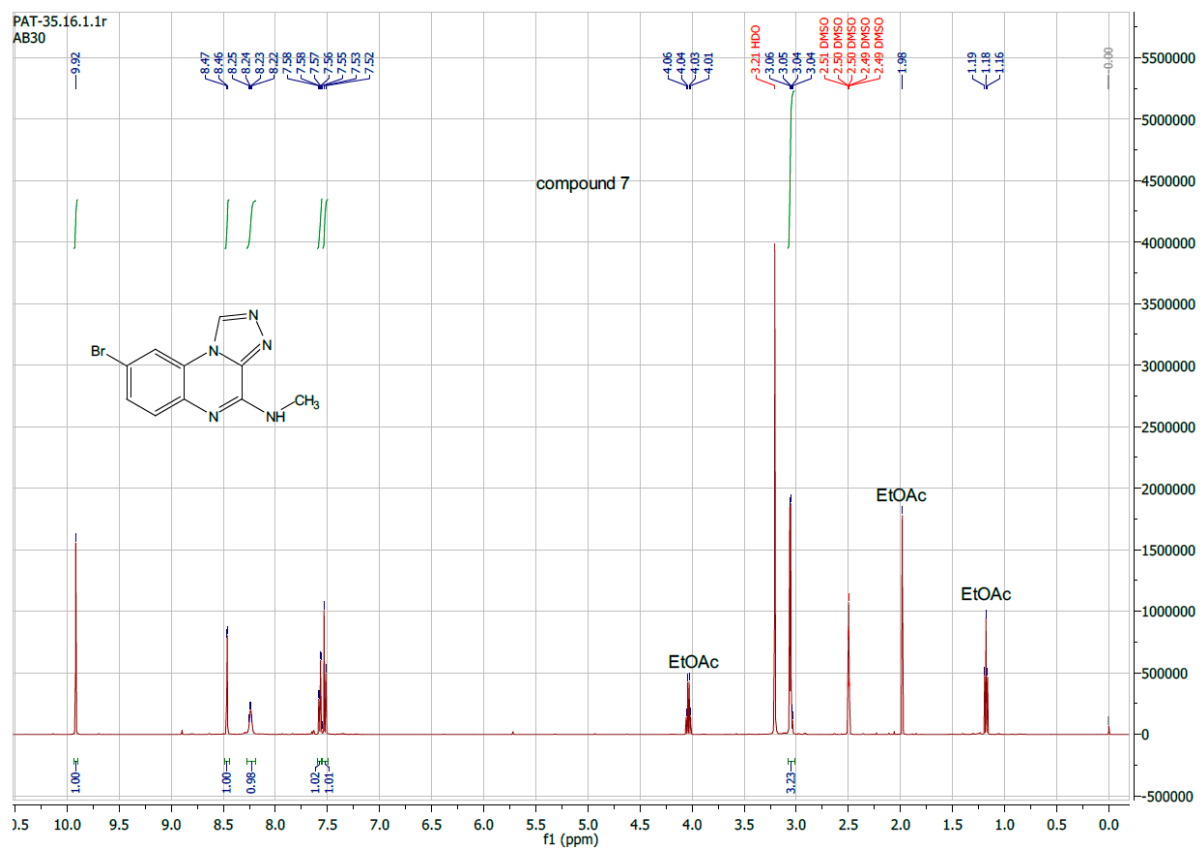

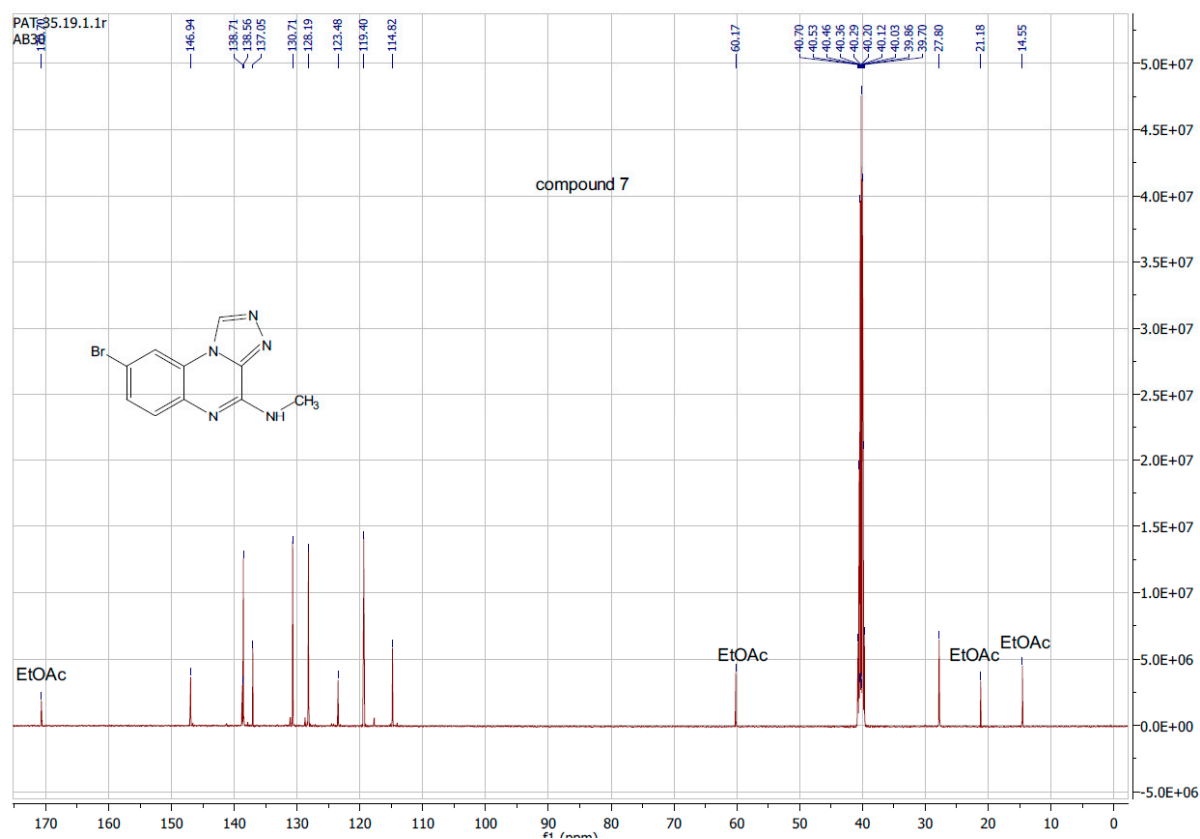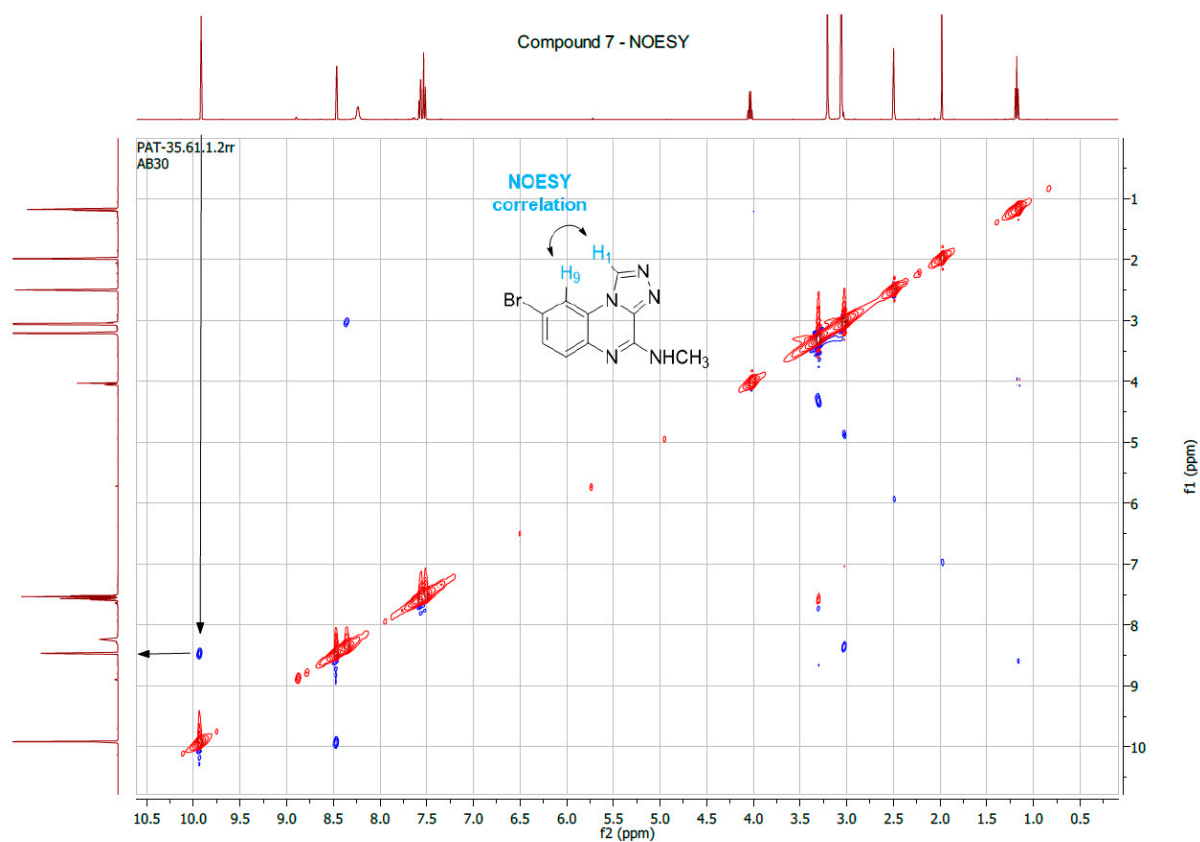

S3. [8-(3,4-Dimethoxy-phenyl)-[1,2,4]triazolo[4,3-a]quinoxalin-4-yl]-methyl-amine (**8a**).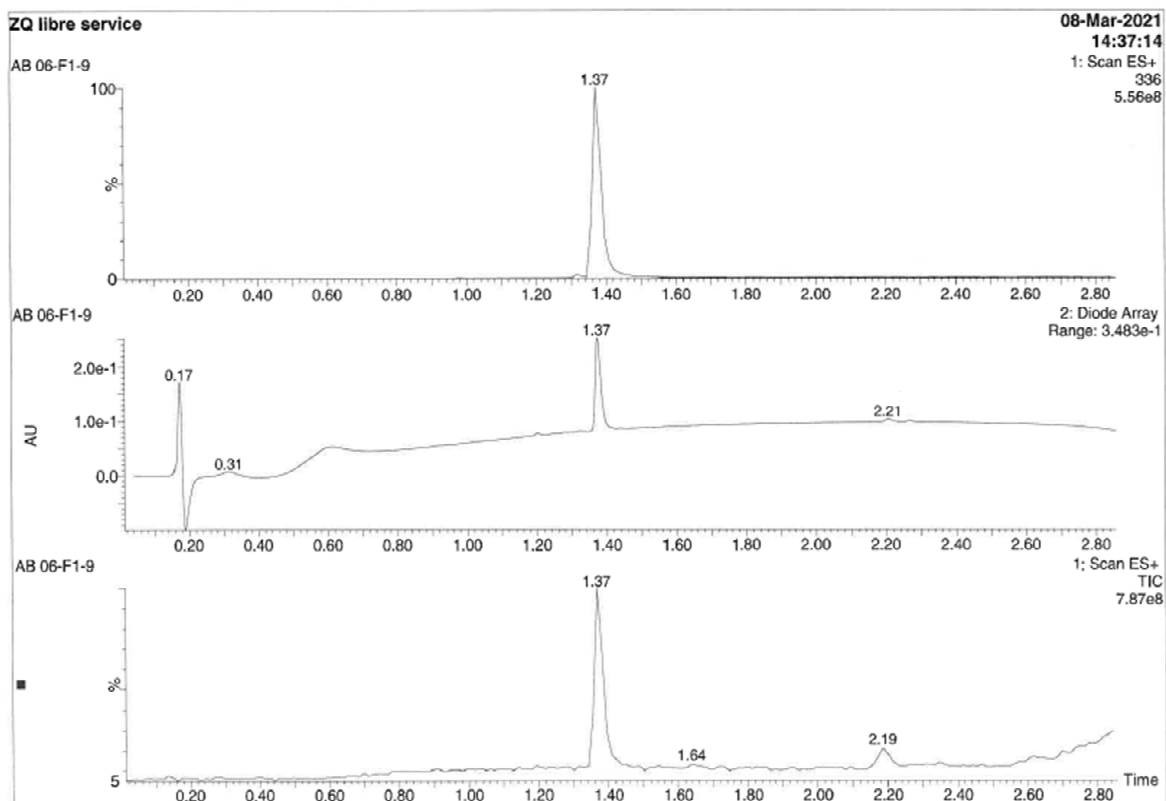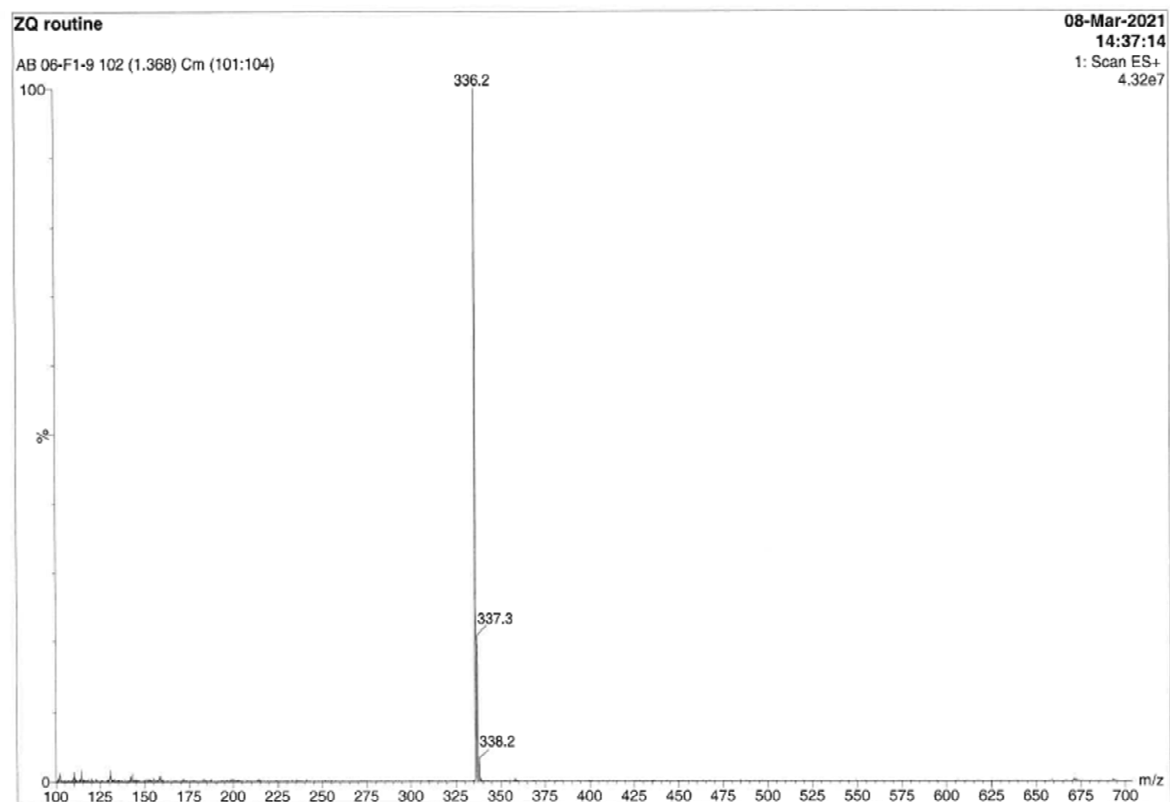

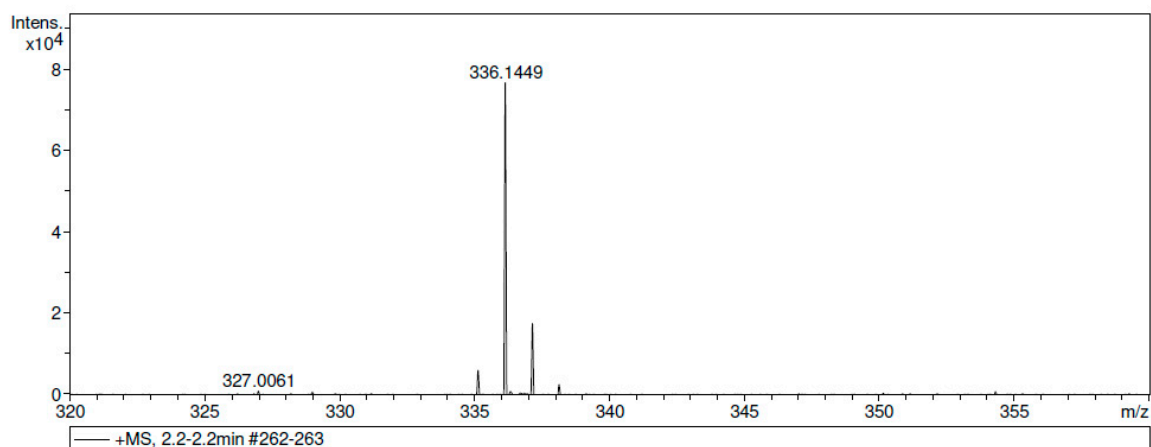

| Meas. m/z | # | Ion Formula                                                   | m/z      | err [ppm] | mSigma | # Sigma | Score  | rdb  | e <sup>-</sup> | Conf | N-Rule |
|-----------|---|---------------------------------------------------------------|----------|-----------|--------|---------|--------|------|----------------|------|--------|
| 336.1449  | 1 | C <sub>18</sub> H <sub>18</sub> N <sub>5</sub> O <sub>2</sub> | 336.1455 | -1.9      | 8.2    | 1       | 100.00 | 12.5 | even           |      | ok     |
|           | 2 | C <sub>17</sub> H <sub>22</sub> N <sub>5</sub> O <sub>6</sub> | 336.1442 | -2.1      | 20.6   | 2       | 74.52  | 7.5  | even           |      | ok     |

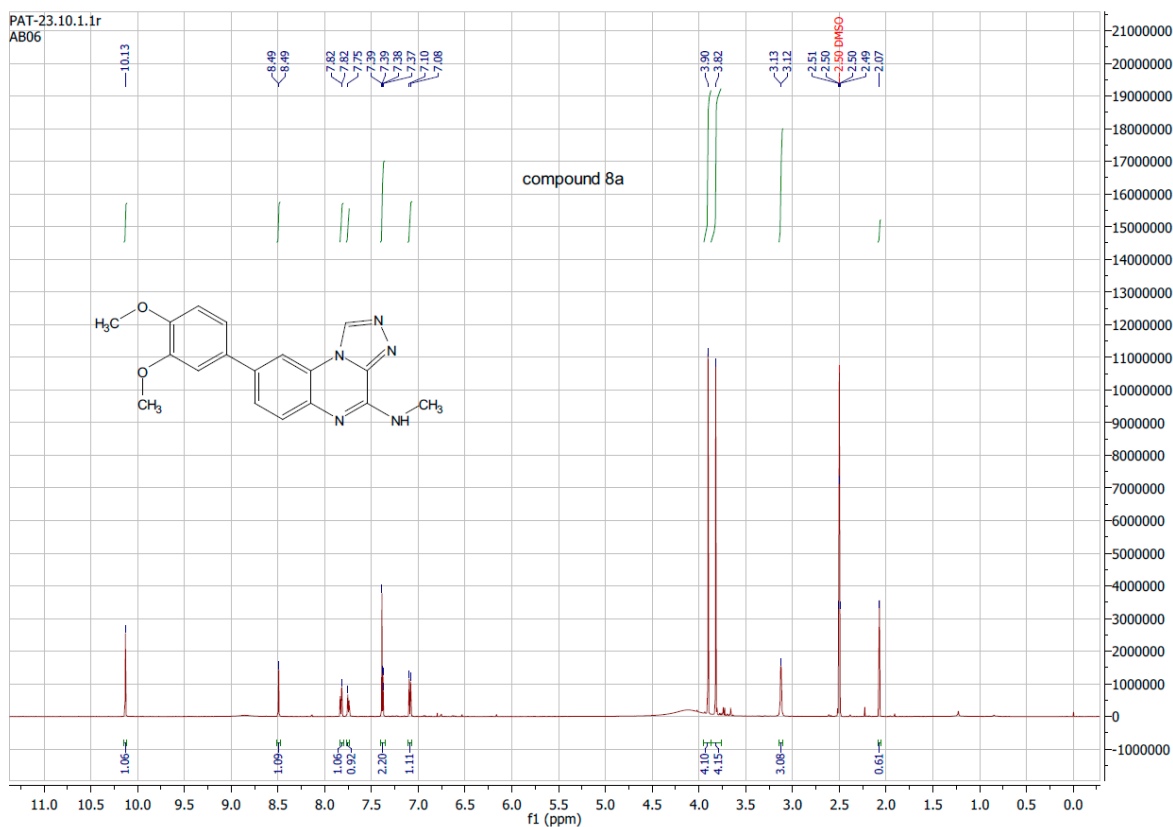

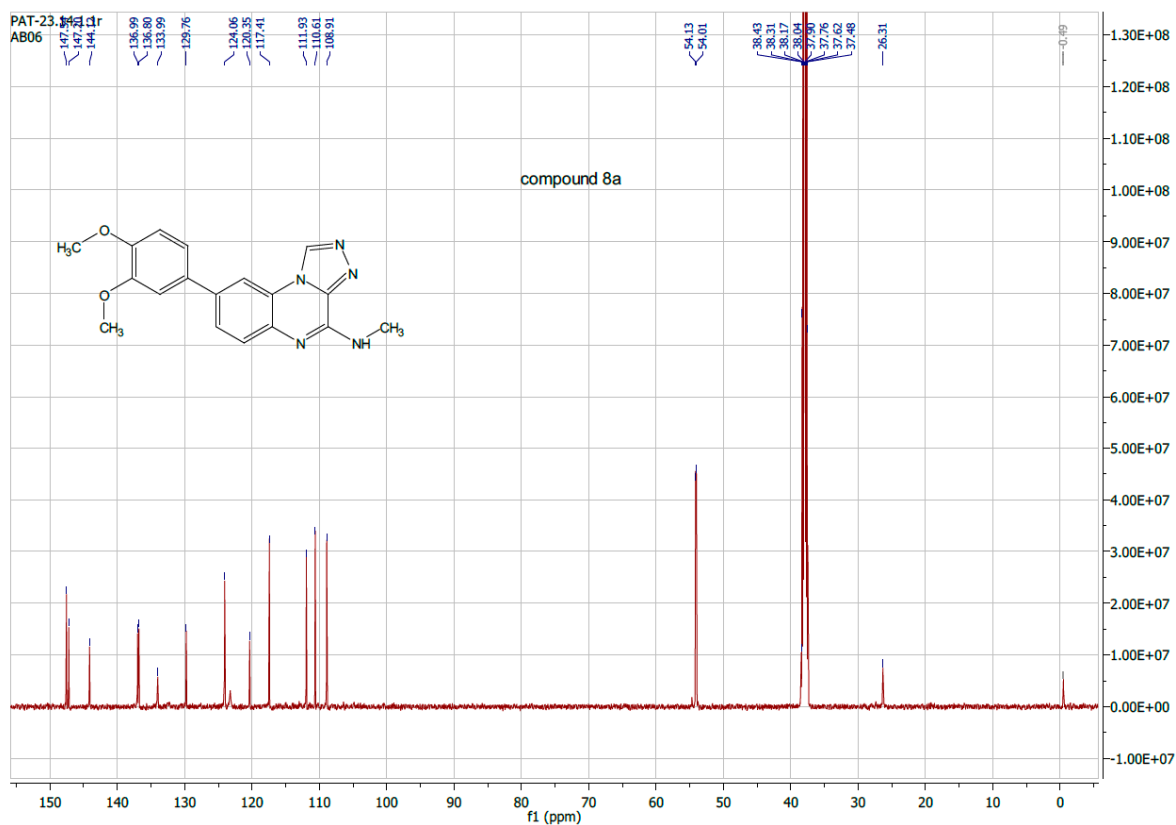

S4. [8-(3-Methoxy-phenyl)-[1,2,4]triazolo[4,3-a]quinoxalin-4-yl]-methyl-amine (**8b**).

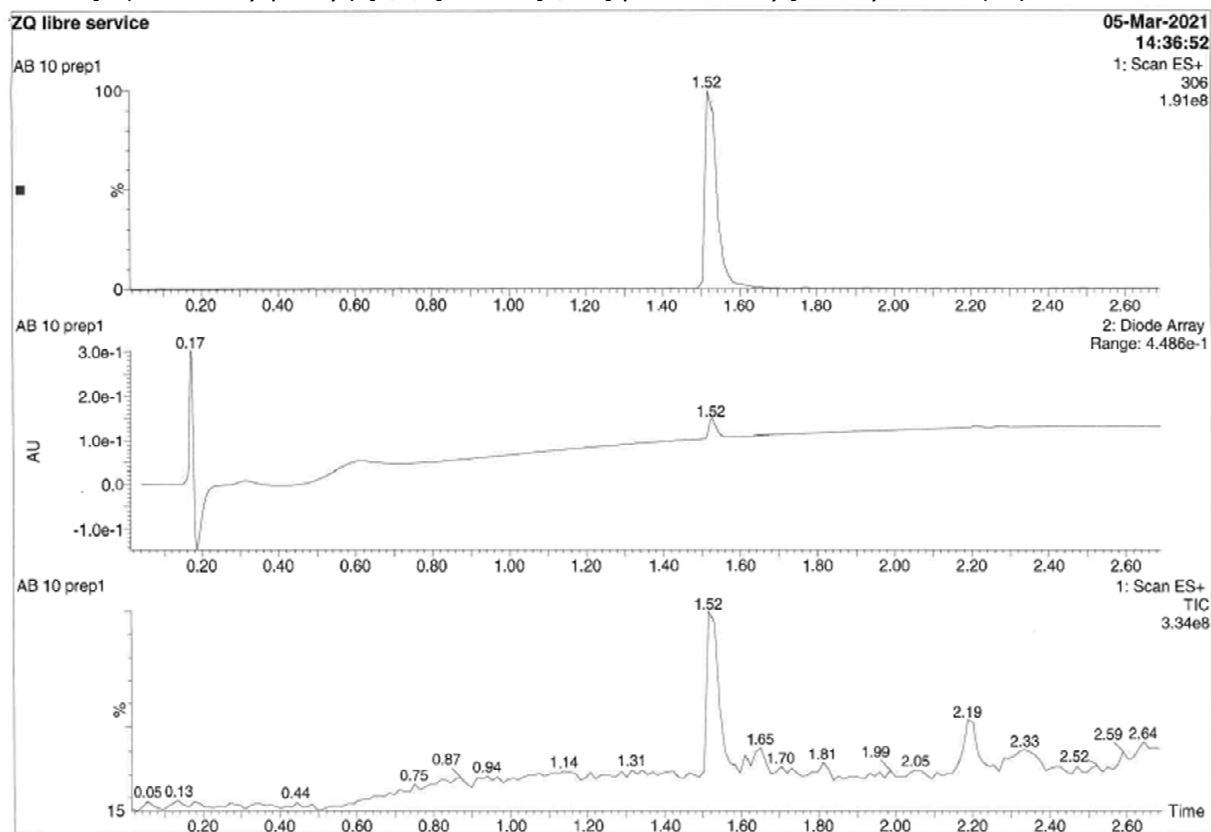



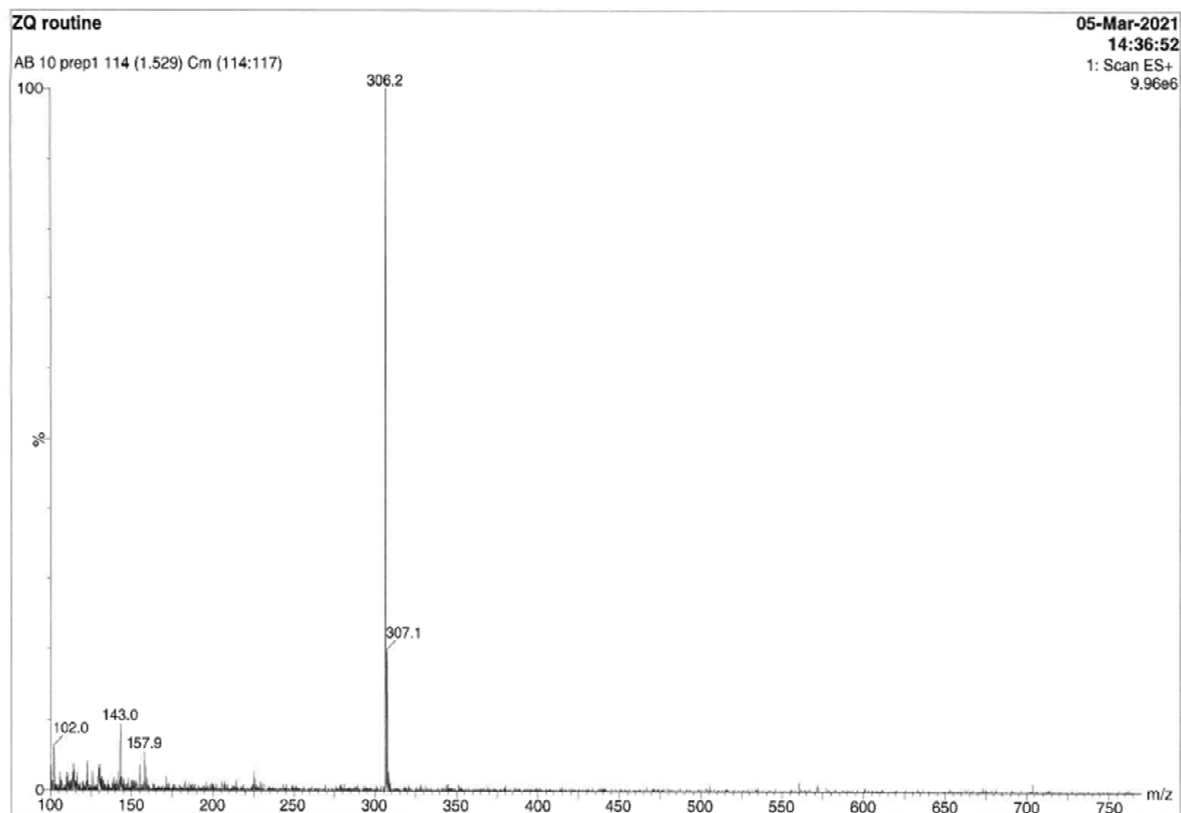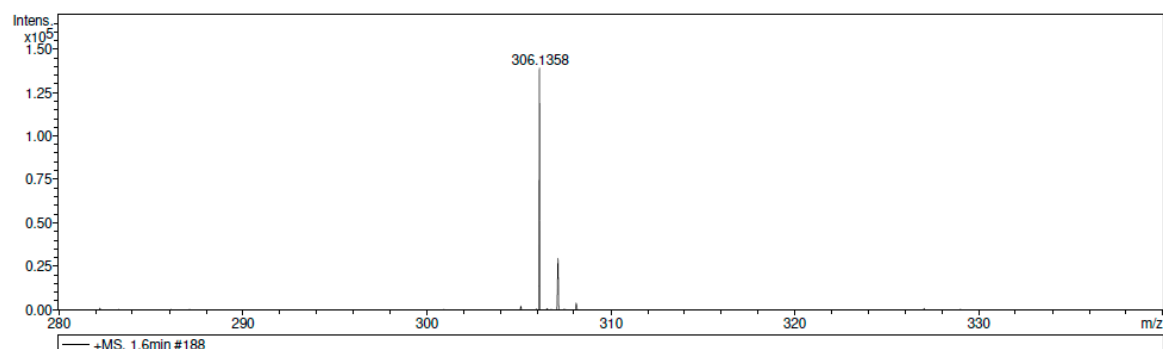

| Meas. m/z | # | Ion Formula | m/z      | err [ppm] | mSigma | # Sigma | Score  | rdb  | e <sup>-</sup> | Conf | N-Rule |
|-----------|---|-------------|----------|-----------|--------|---------|--------|------|----------------|------|--------|
| 306.1358  | 1 | C17H16N5O   | 306.1349 | -2.7      | 7.6    | 1       | 100.00 | 12.5 | even           |      | ok     |

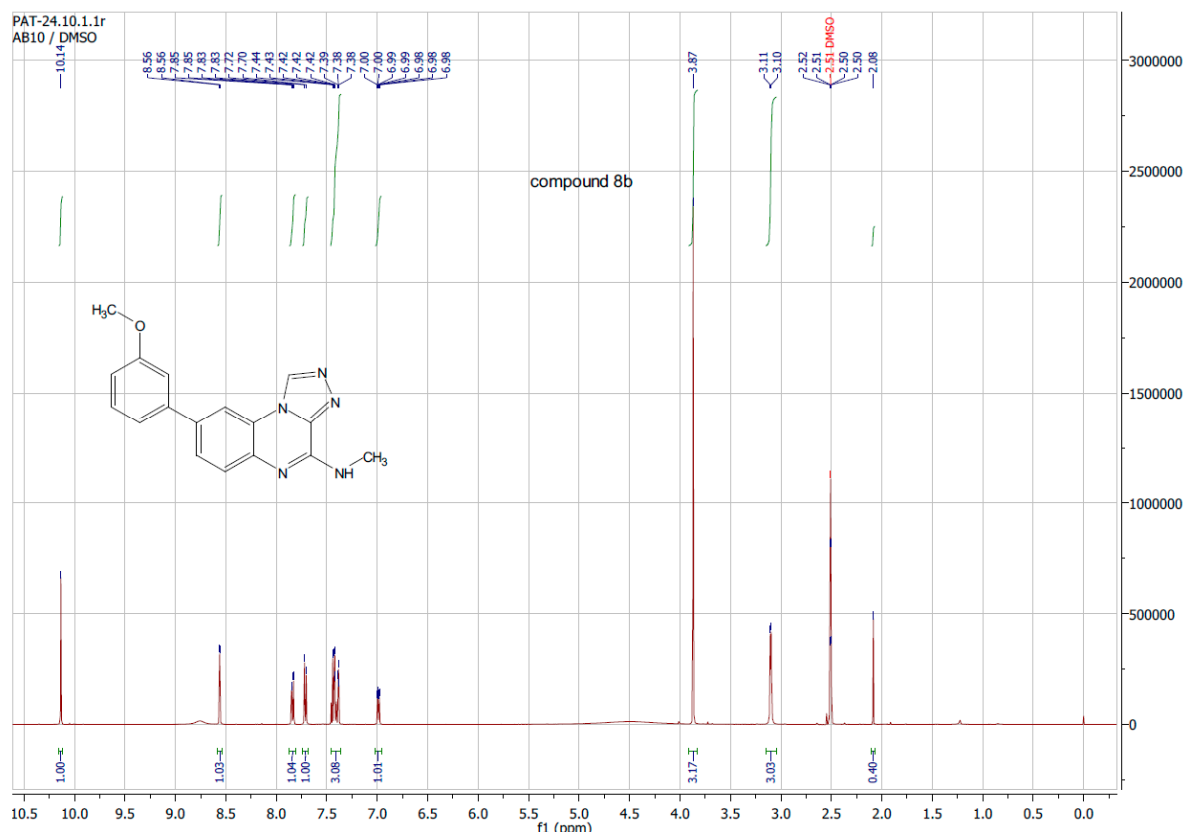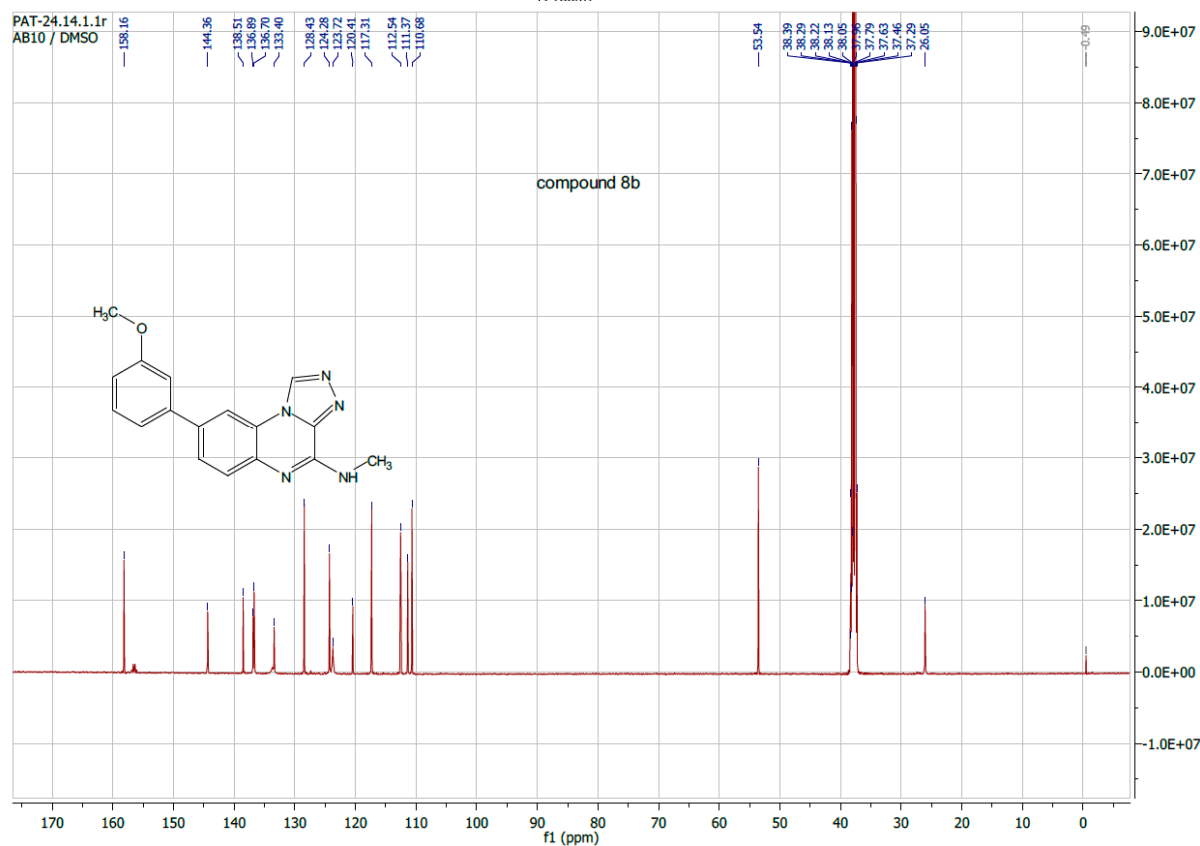



S5. Methyl-(8-phenyl-[1,2,4]triazolo[4,3-a]quinoxalin-4-yl)-amine (**8c**).

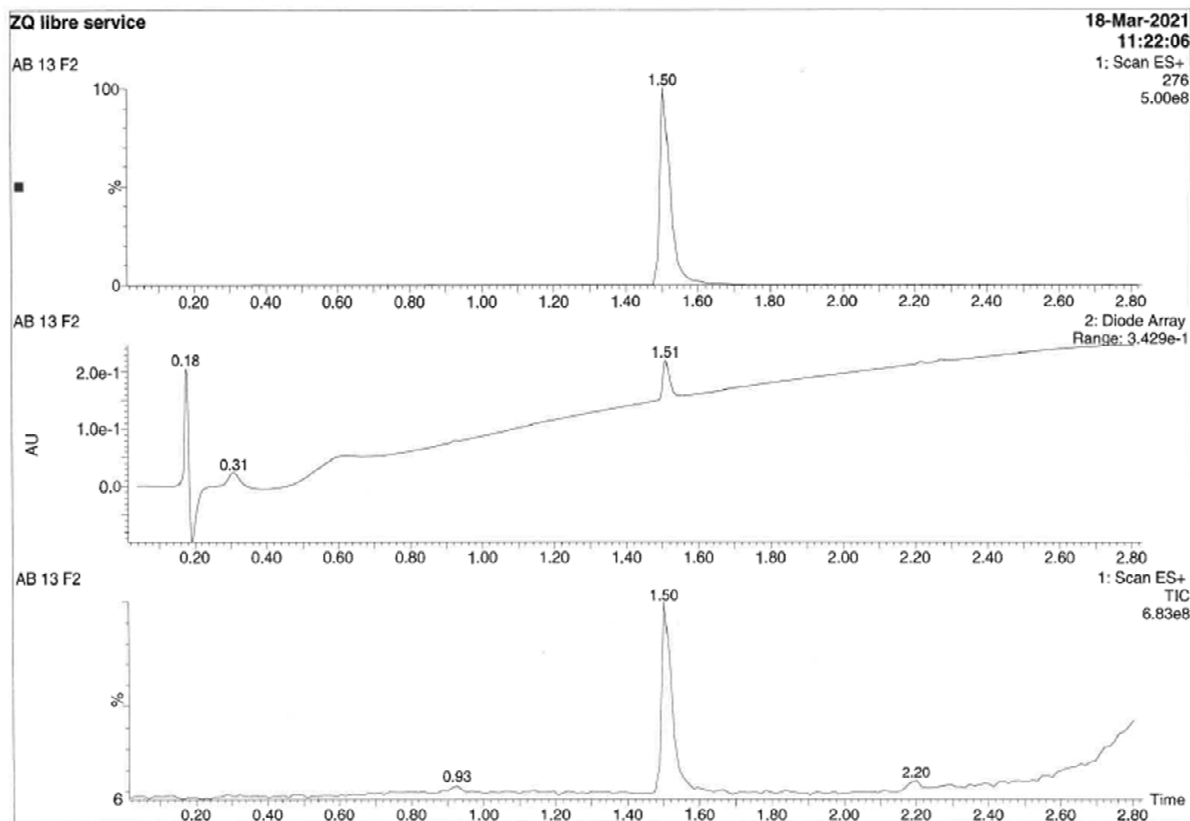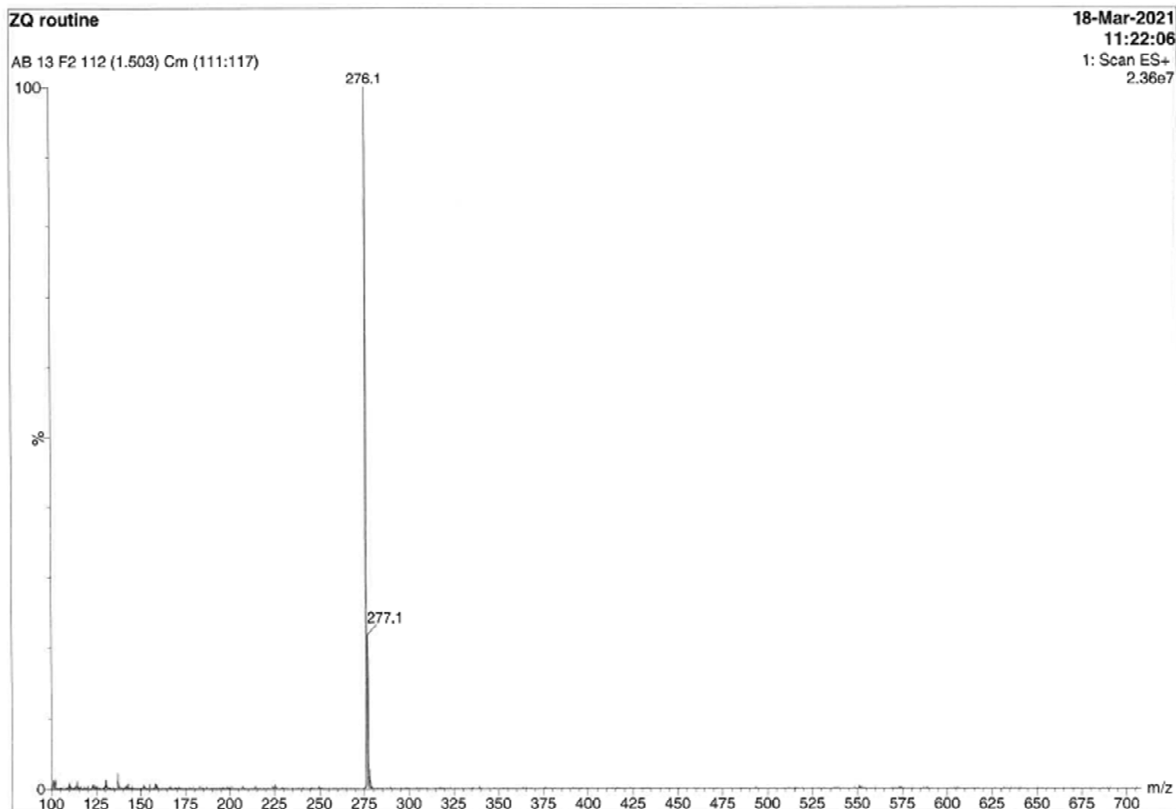

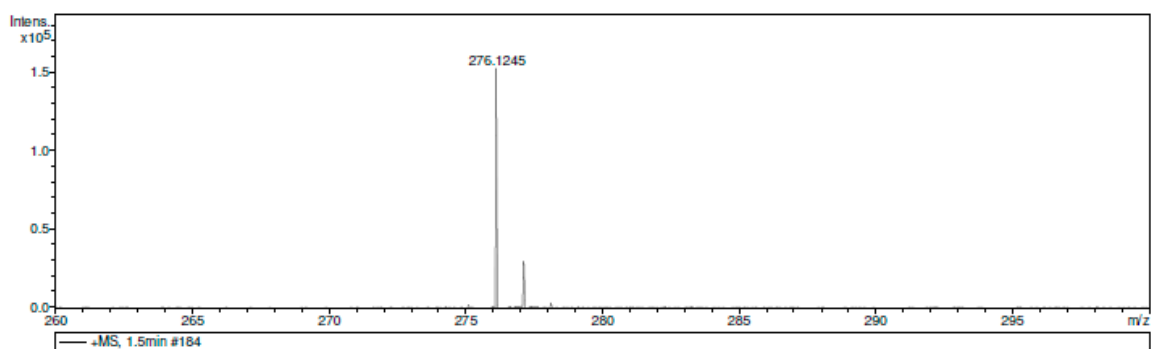

| Meas. m/z | # | Ion Formula                                    | m/z      | err [ppm] | mSigma | # Sigma | Score  | rdb  | e <sup>-</sup> | Conf | N-Rule |
|-----------|---|------------------------------------------------|----------|-----------|--------|---------|--------|------|----------------|------|--------|
| 276.1245  | 1 | C <sub>16</sub> H <sub>14</sub> N <sub>5</sub> | 276.1244 | -0.3      | 1.7    | 1       | 100.00 | 12.5 | even           | ok   |        |

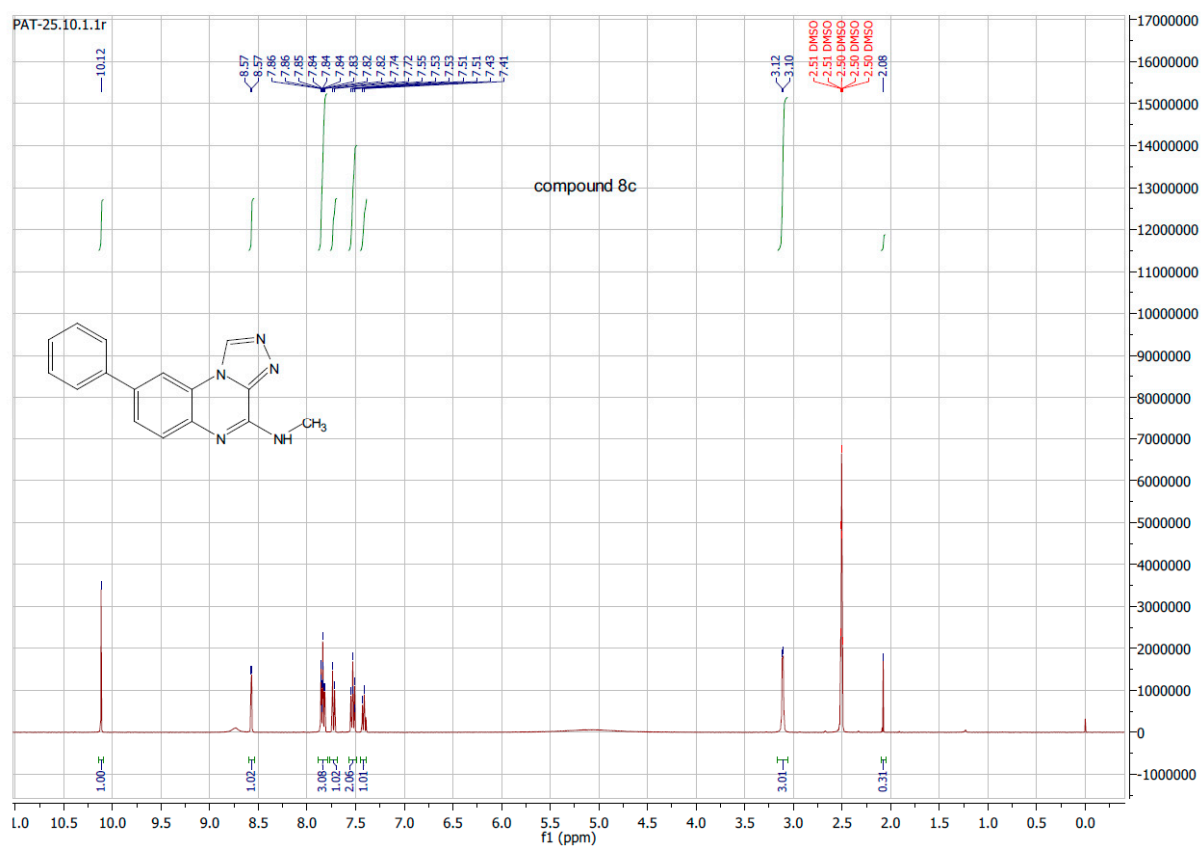

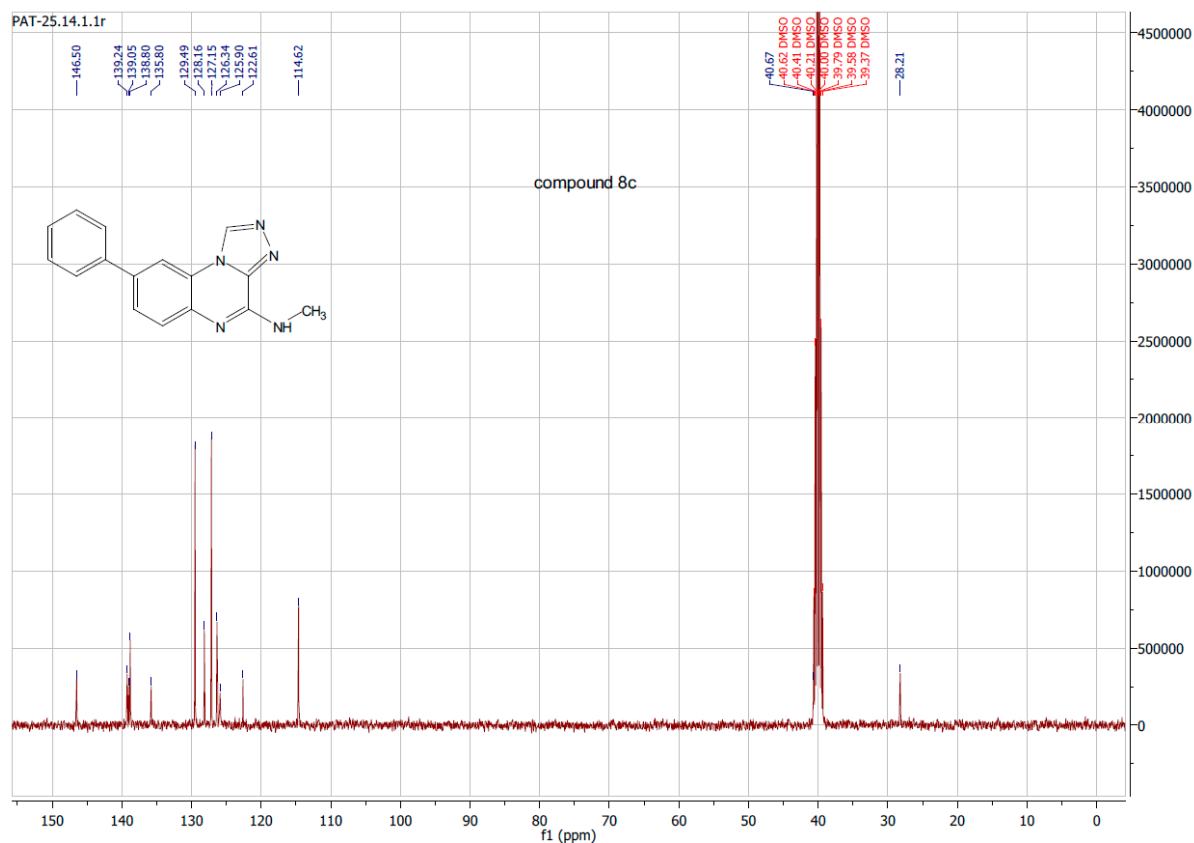

S6. Methyl-[8-(3,4,5-trimethoxy-phenyl)-[1,2,4]triazolo[4,3-a]quinoxalin-4-yl]-amine (**8d**).

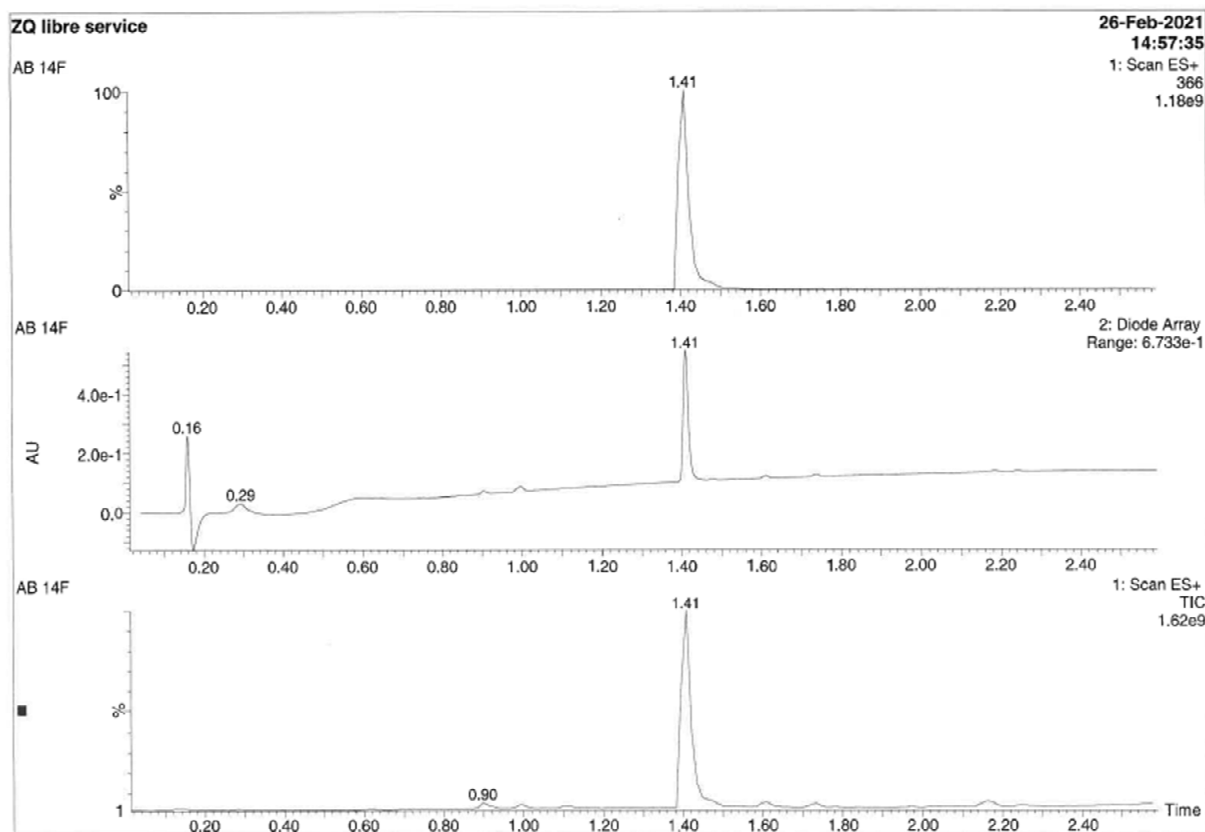

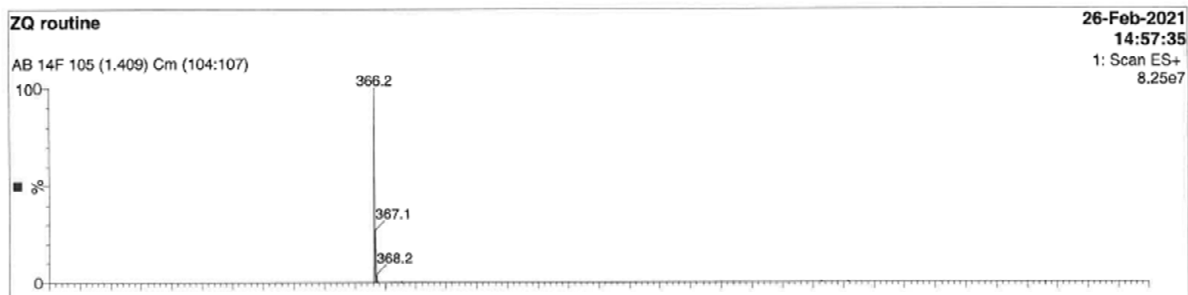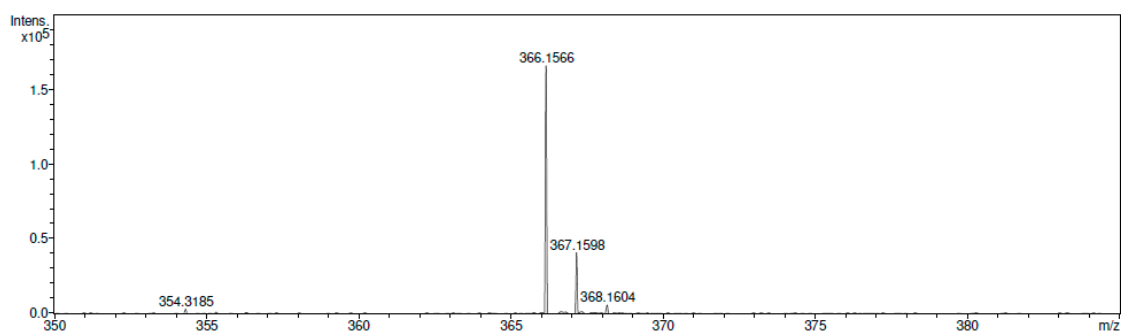

| Meas. m/z | # | Ion Formula                                                   | m/z      | err [ppm] | mSigma | # Sigma | Score  | rdB  | e <sup>-</sup> | Conf | N-Rule |
|-----------|---|---------------------------------------------------------------|----------|-----------|--------|---------|--------|------|----------------|------|--------|
| 366.1566  | 1 | C <sub>19</sub> H <sub>20</sub> N <sub>5</sub> O <sub>3</sub> | 366.1561 | -1.4      | 10.4   | 1       | 100.00 | 12.5 | even           |      | ok     |

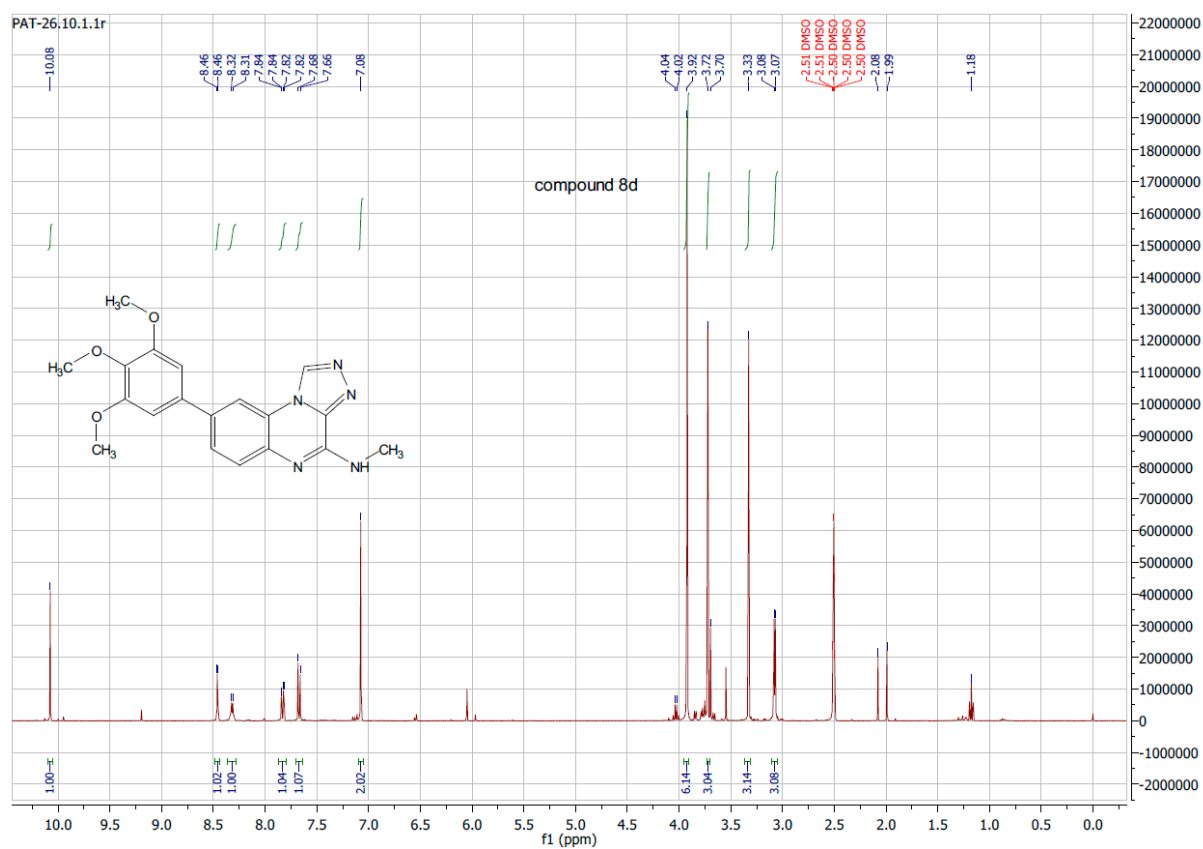

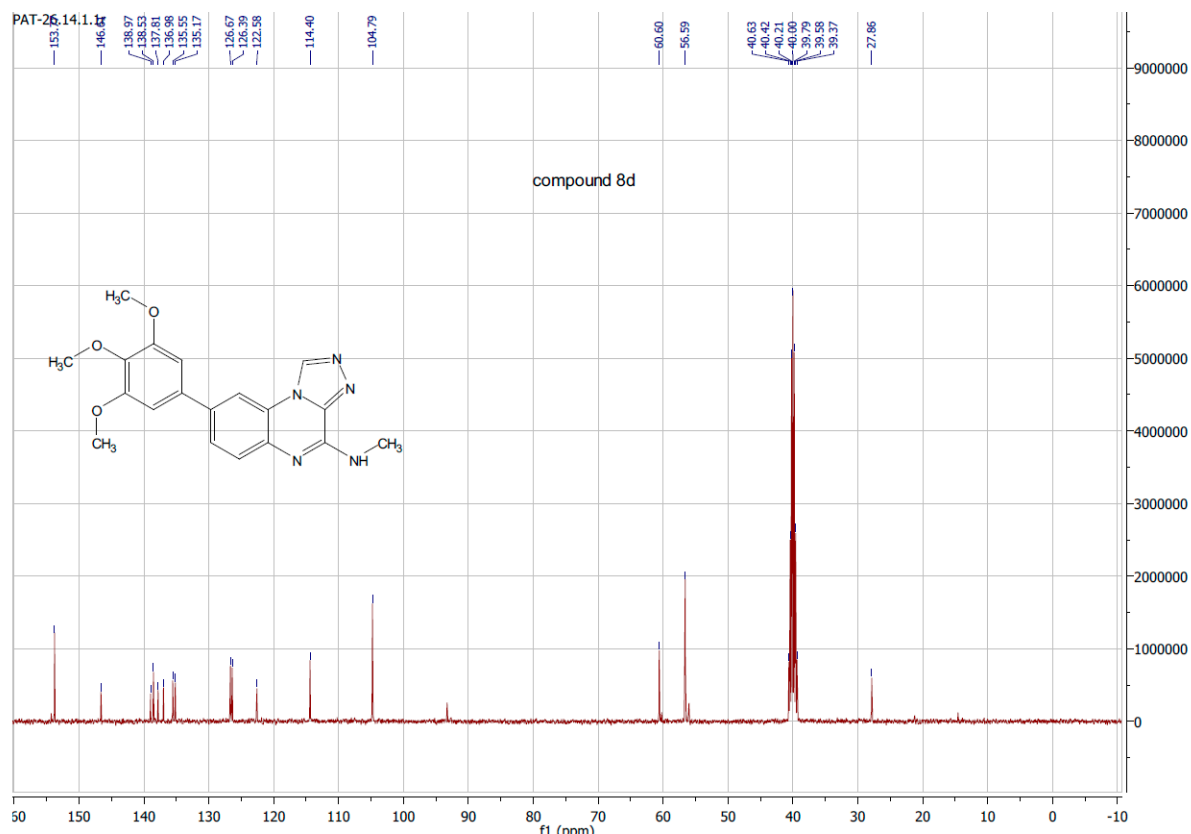

S7. 2-chloro-3-(2-(3,4-dimethoxybenzylidene)hydrazinyl)quinoxaline (**14a**).

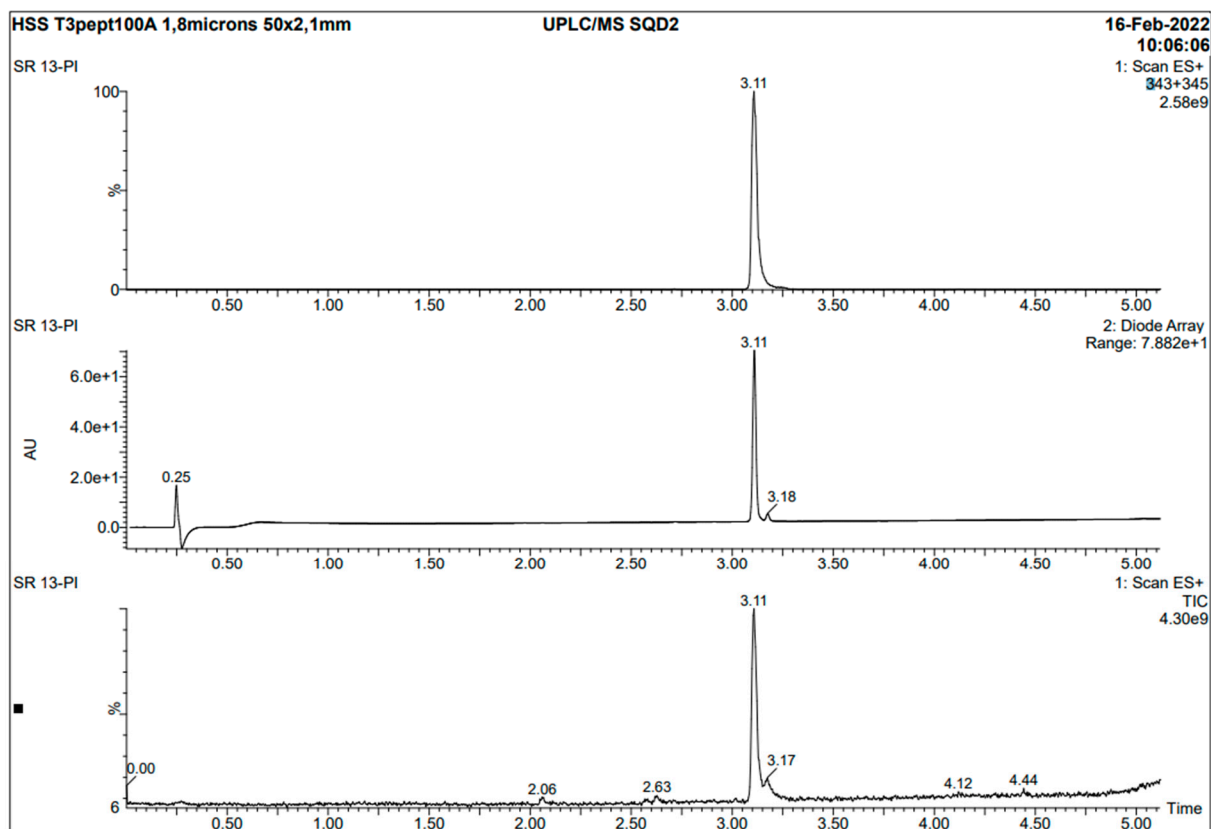

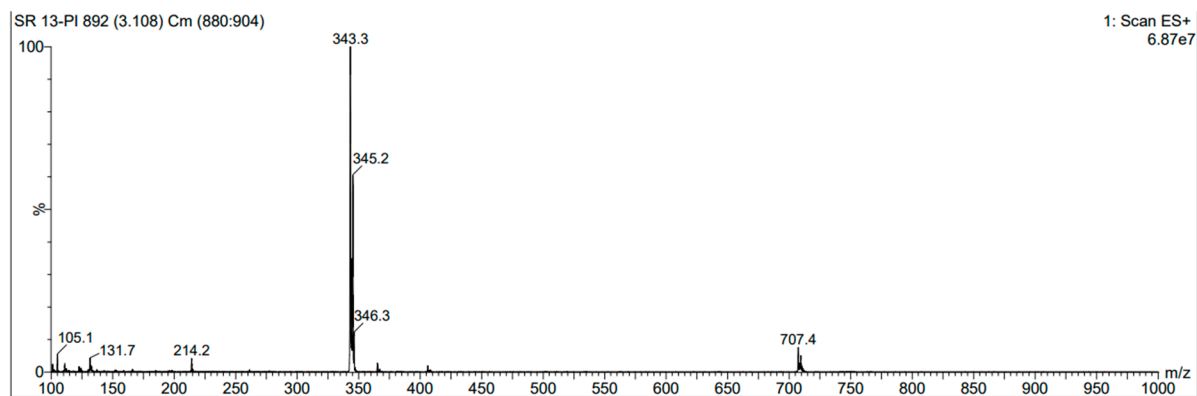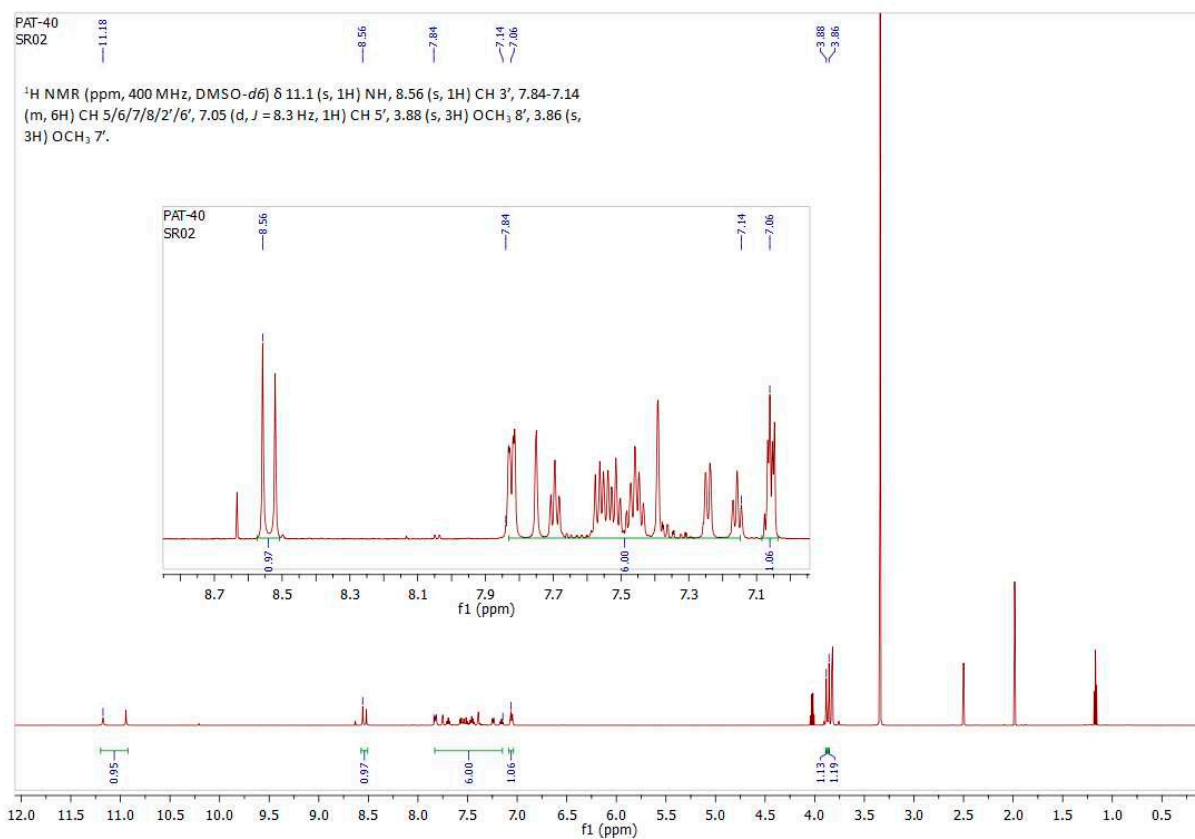



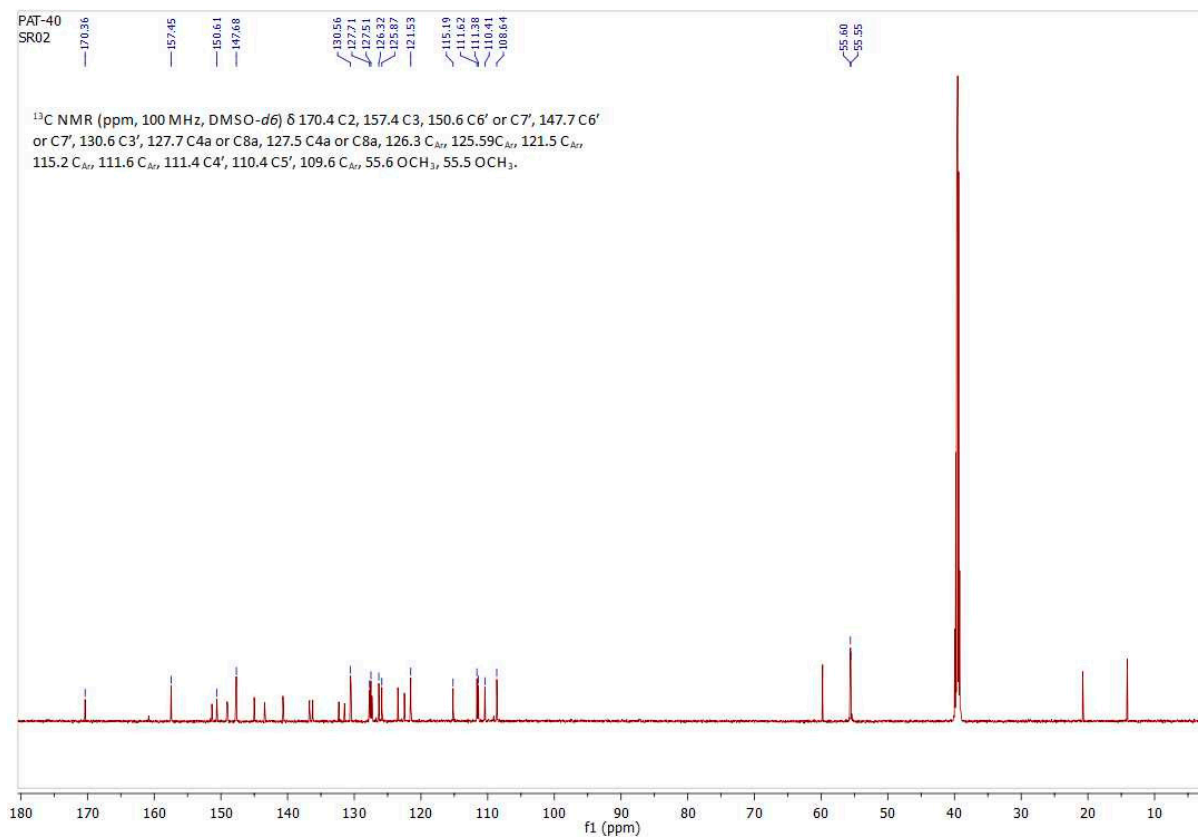

S8. 2-chloro-3-(2-(3-methoxybenzylidene)hydrazinyl)quinoxaline (**14b**).

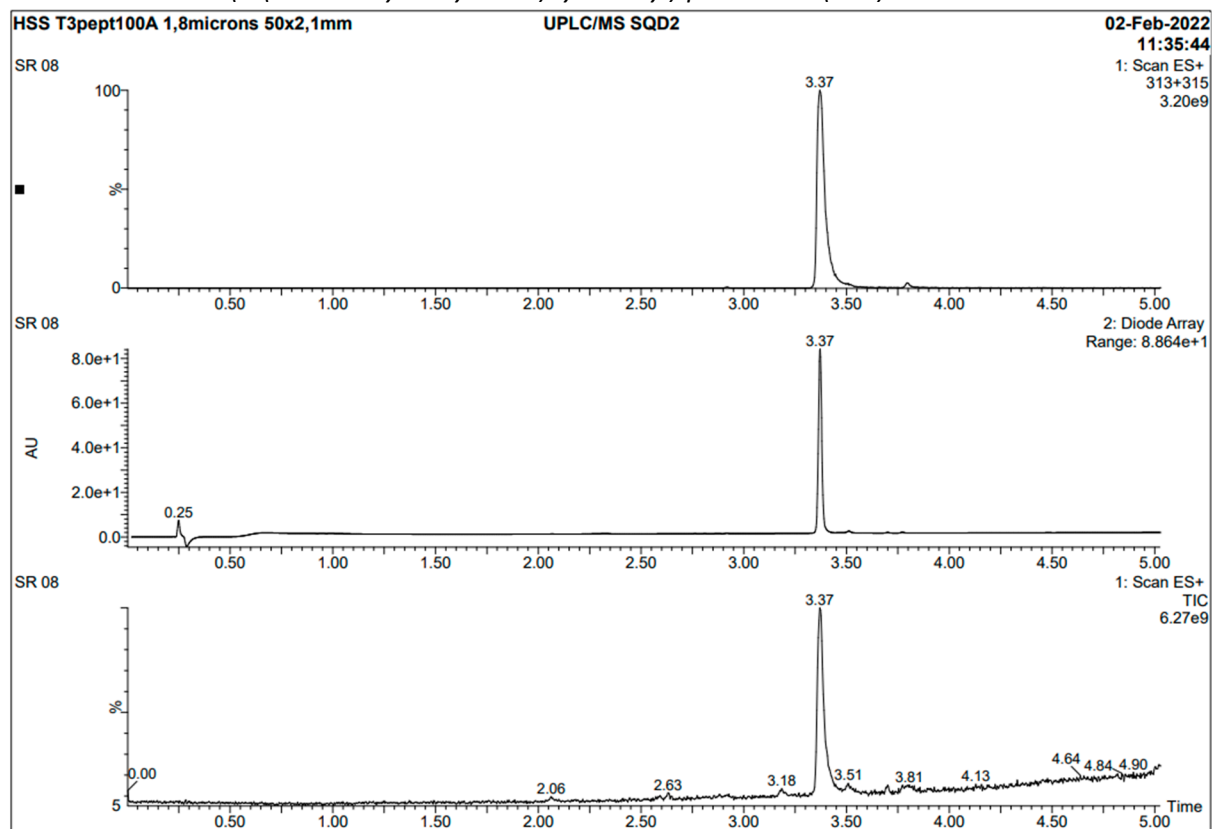

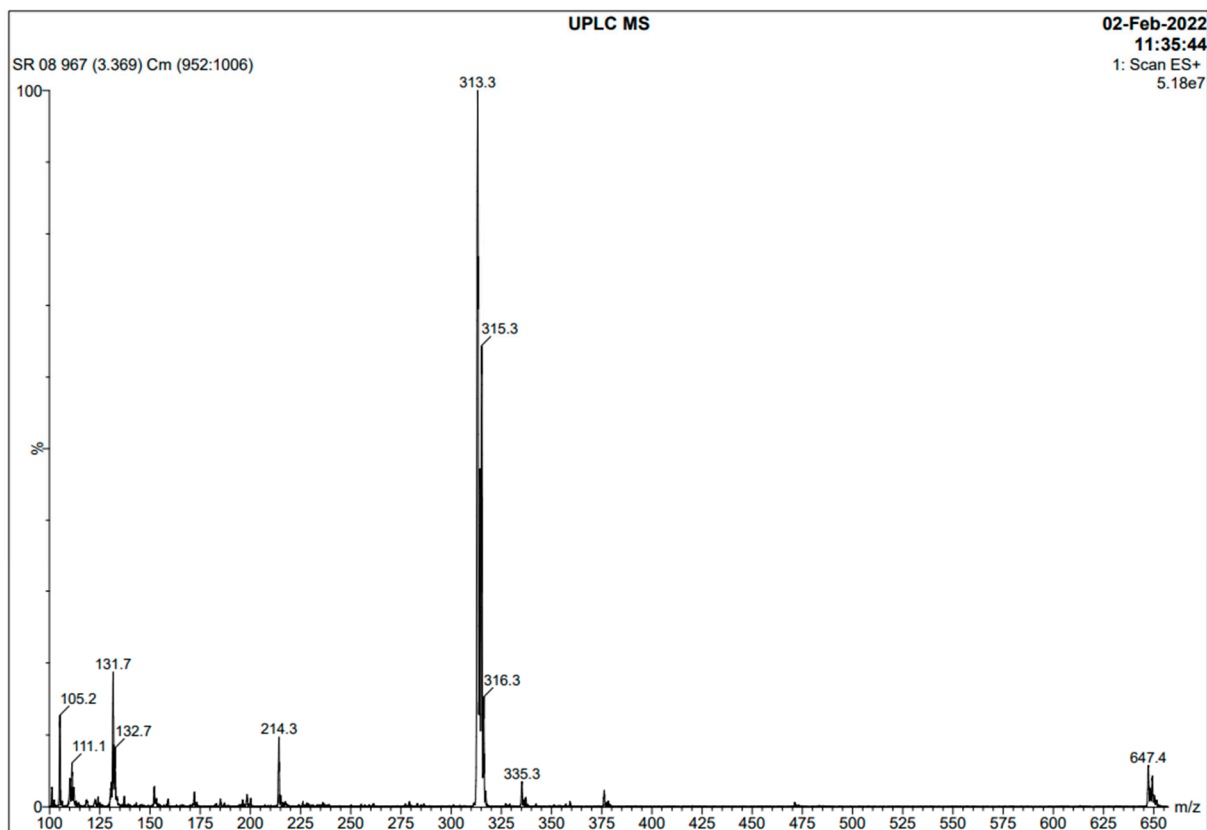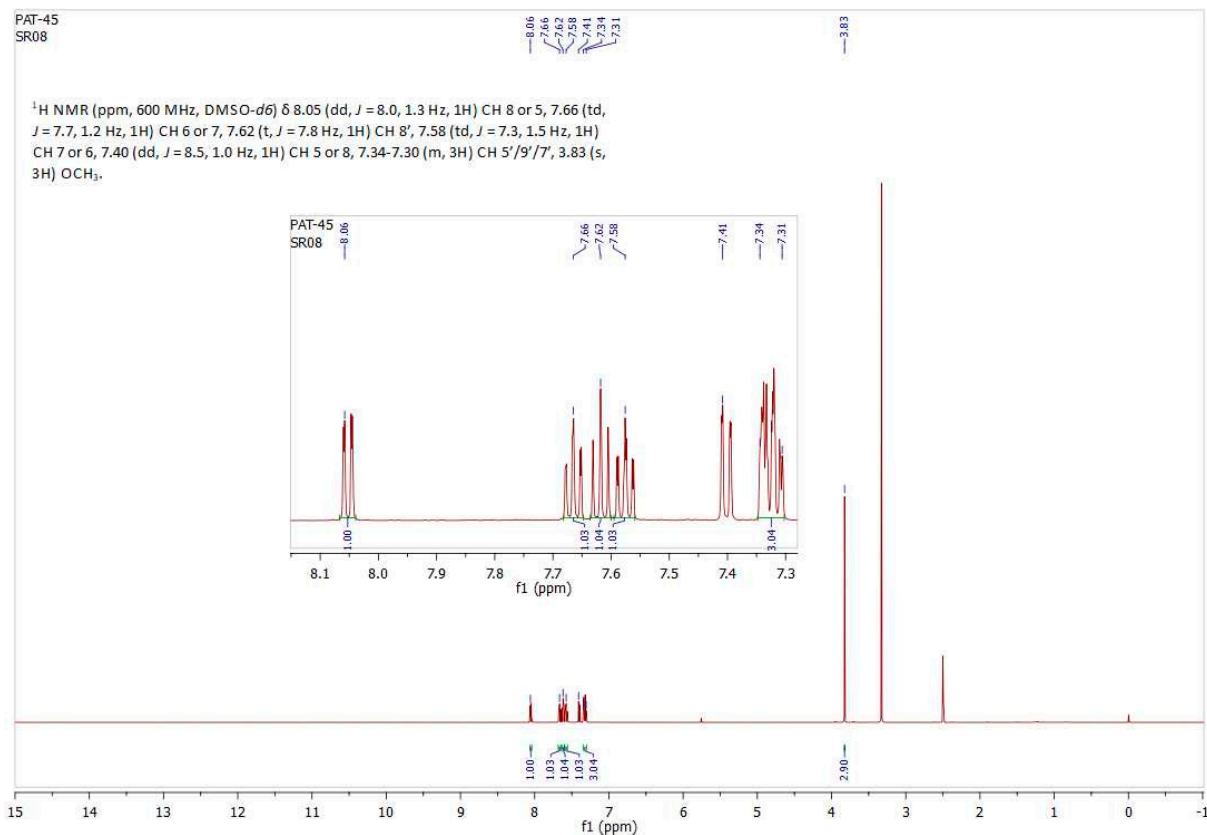

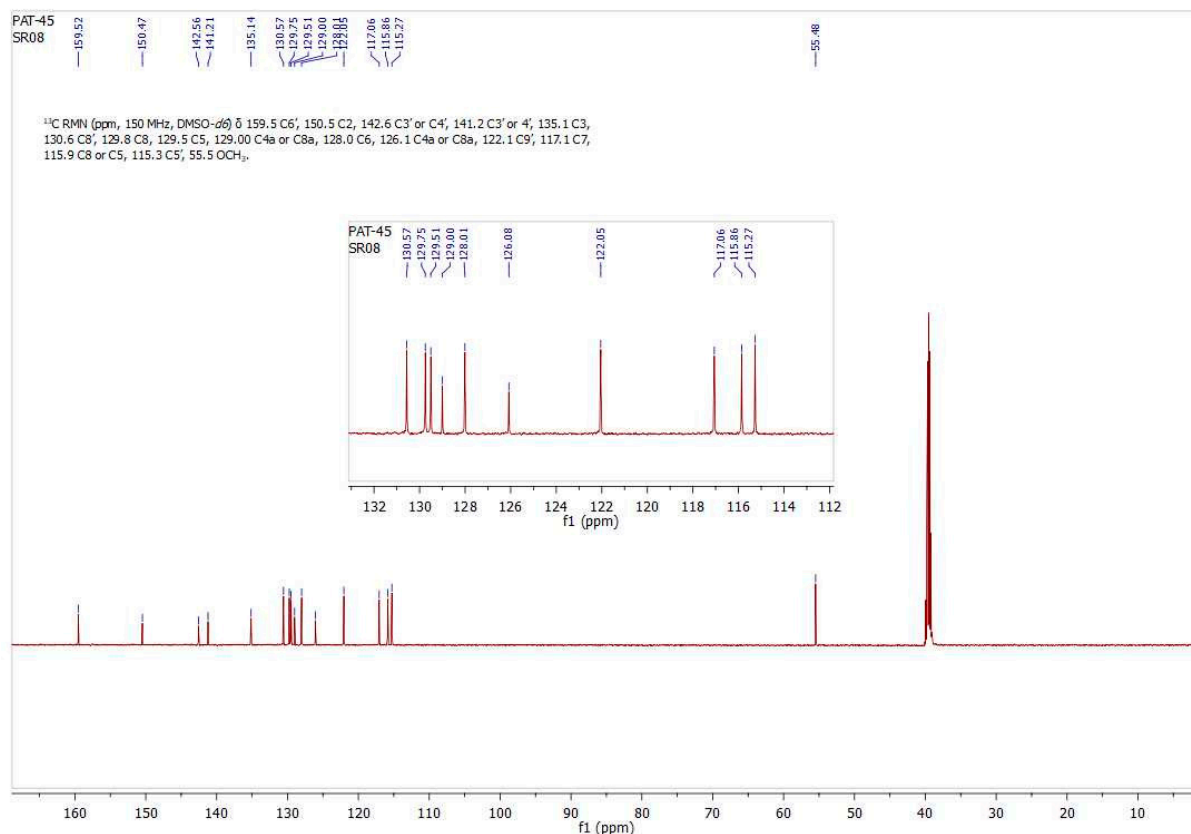

S9. 2-(2-benzylidenehydrazinyl)-3-chloroquinoxaline (**14c**).

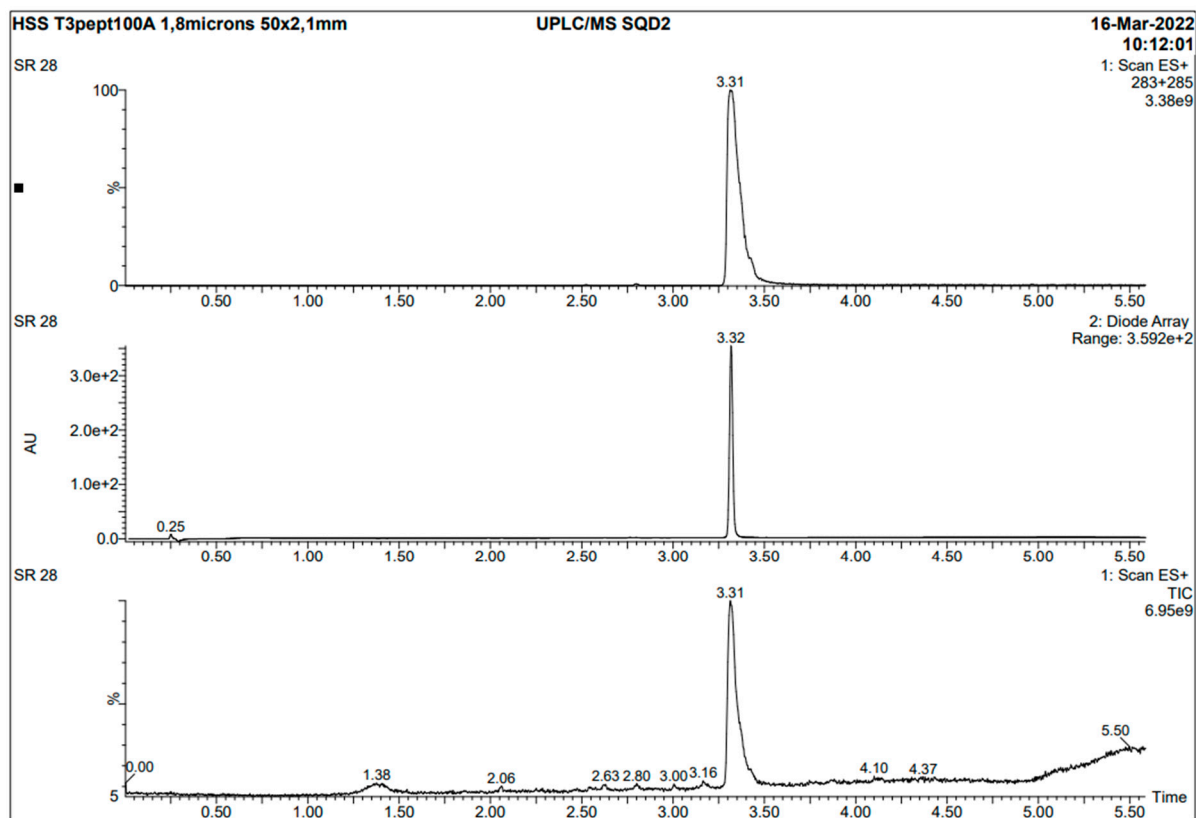

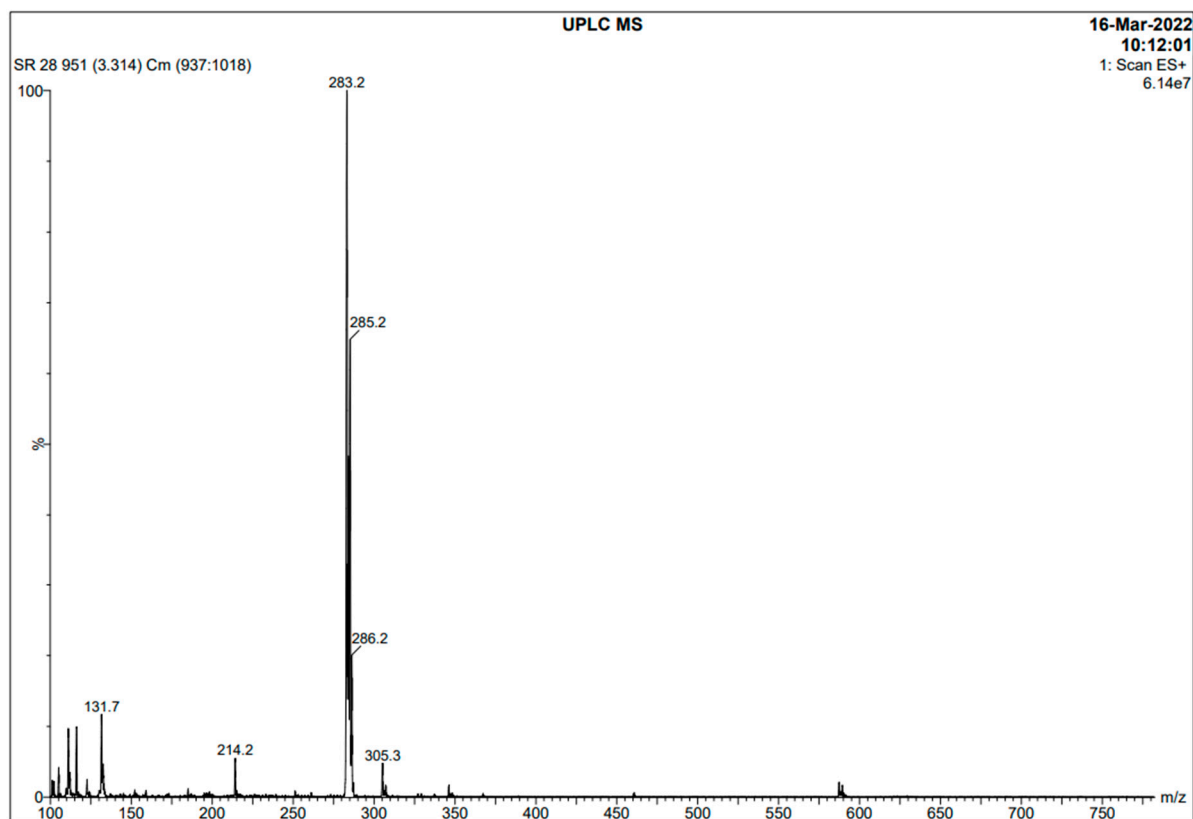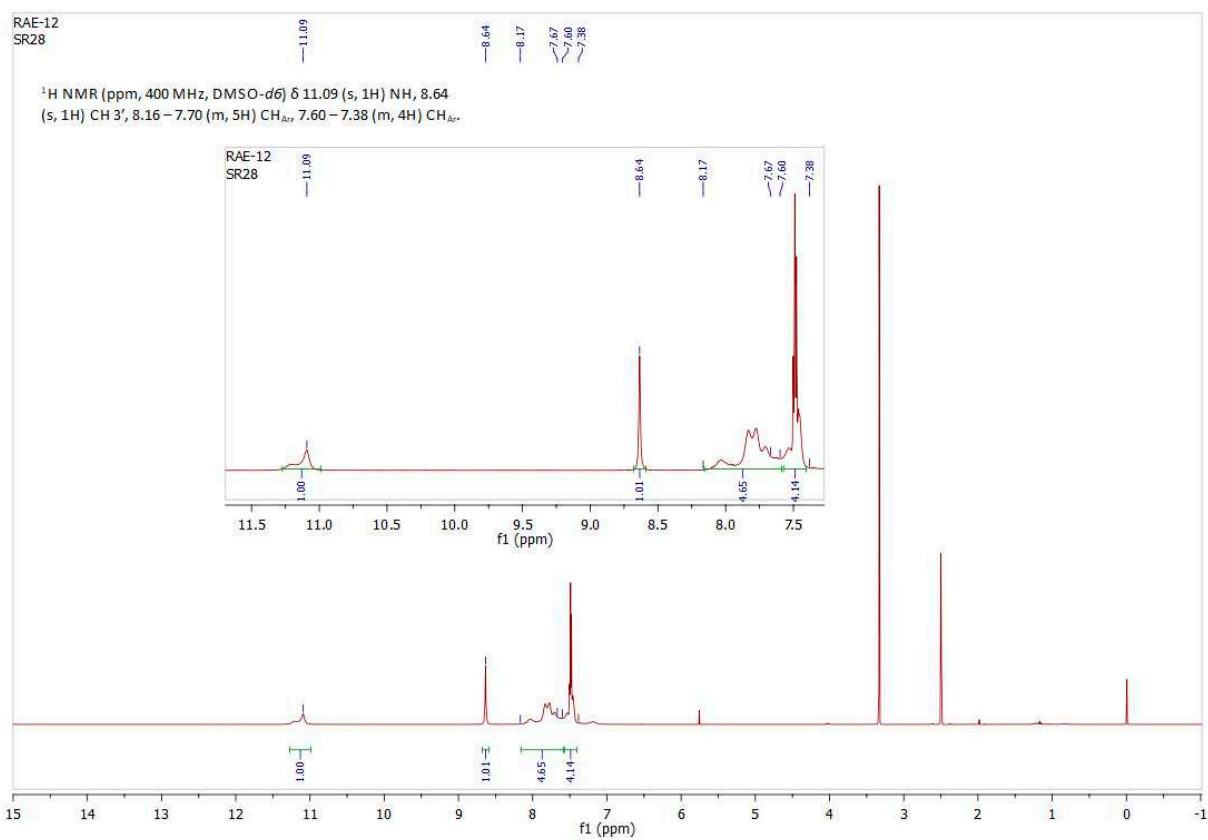

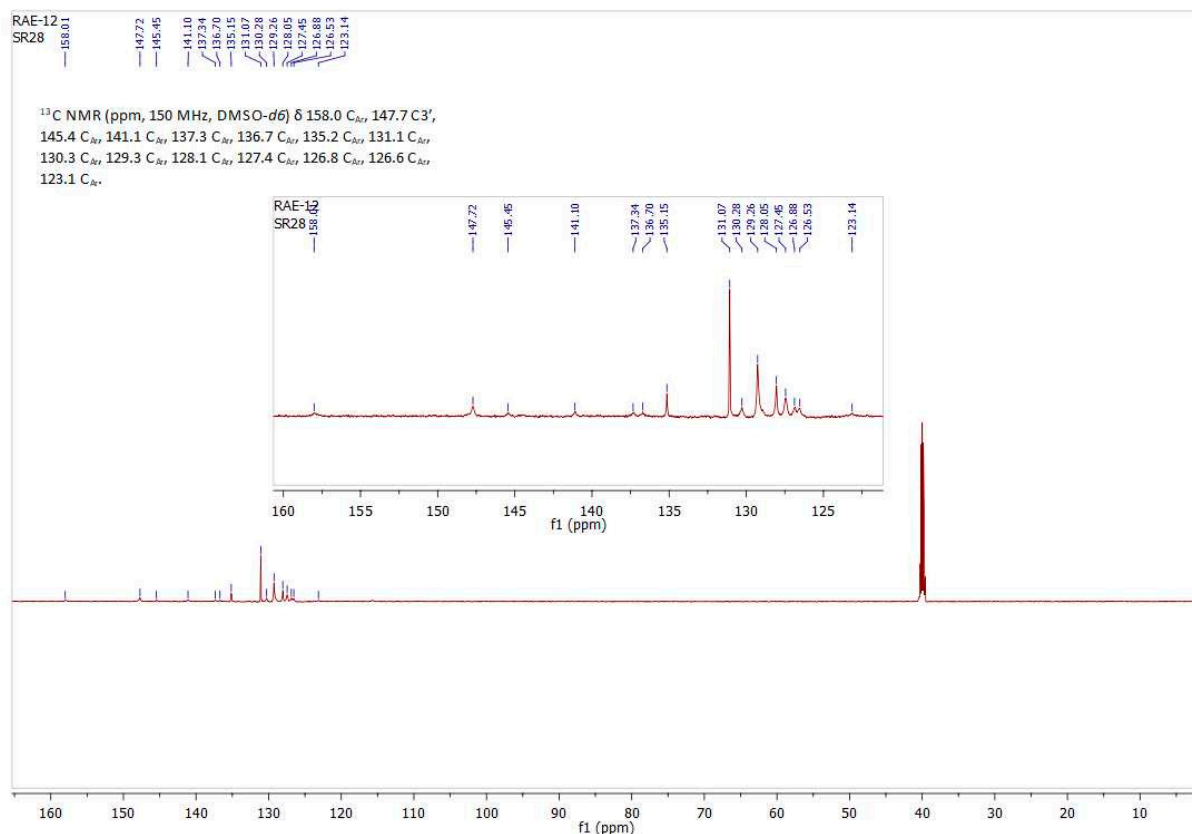

S10. 2-chloro-3-(2-(3,4,5-trimethoxybenzylidene)hydrazinyl)quinoxaline (**14d**).

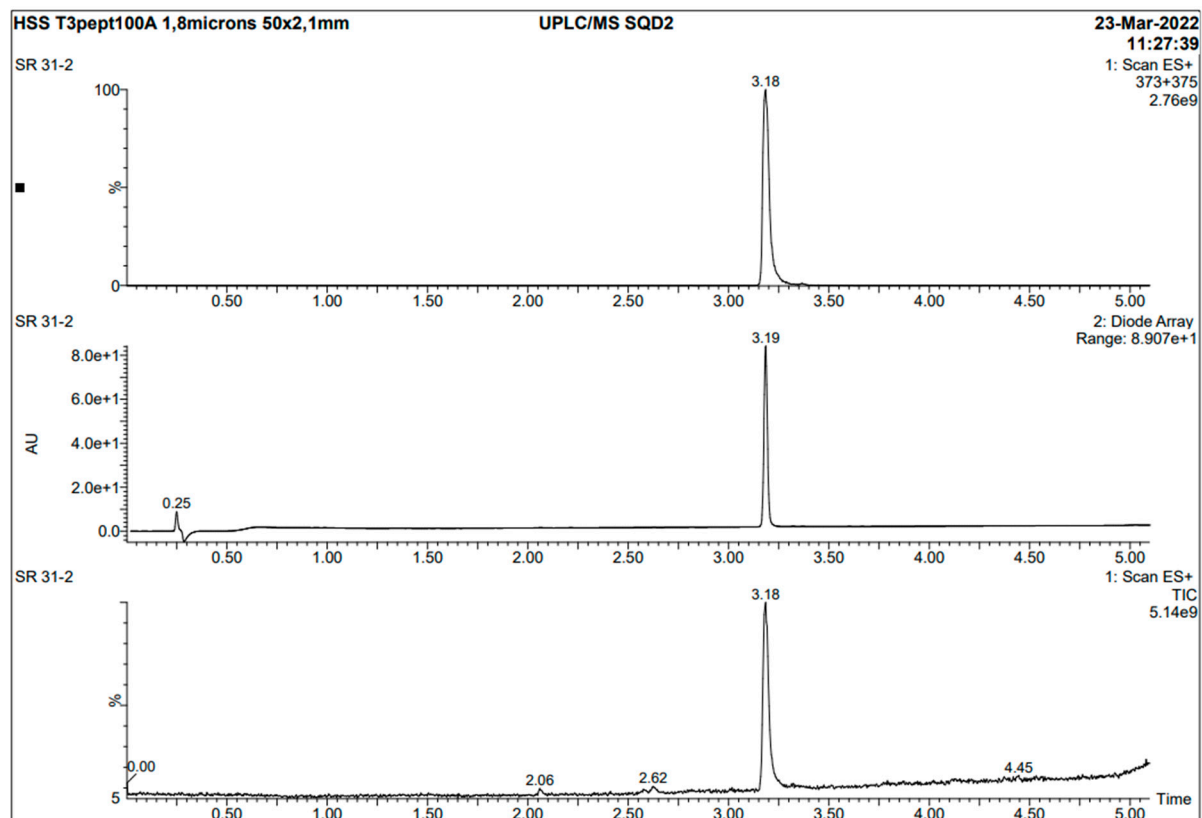

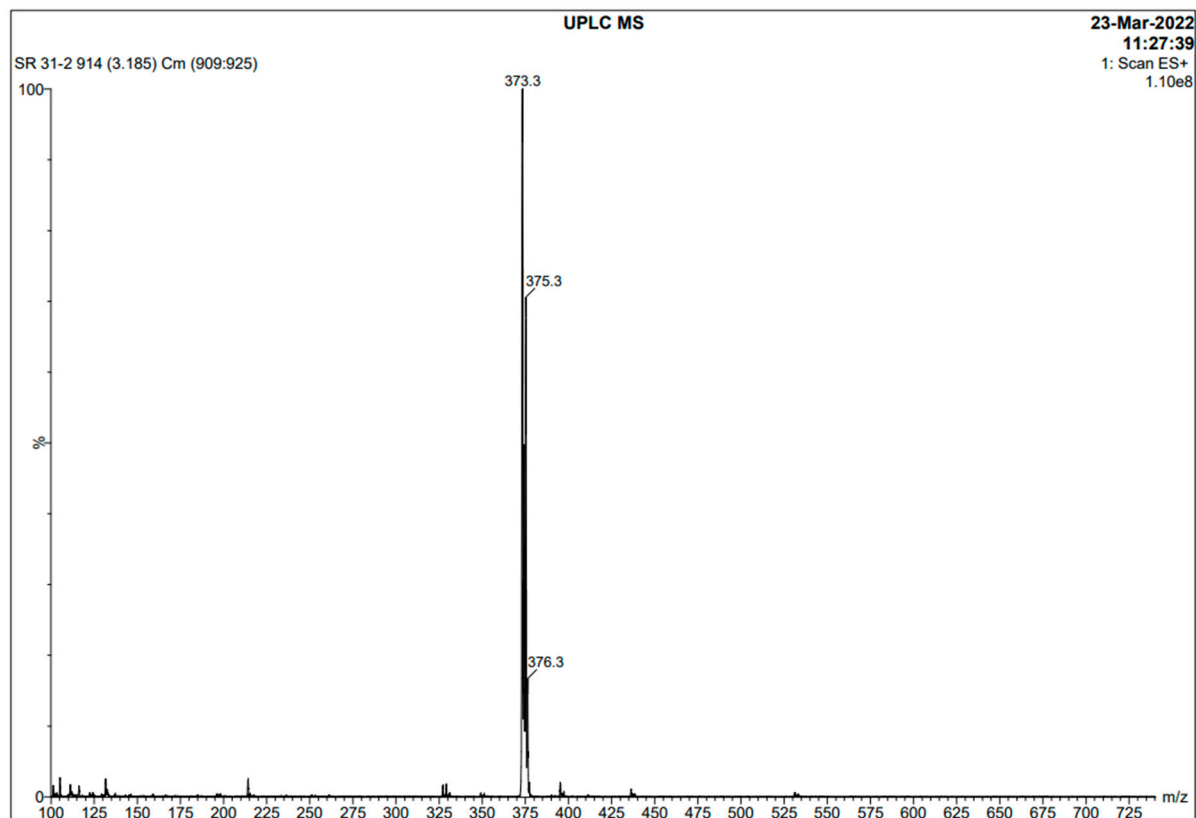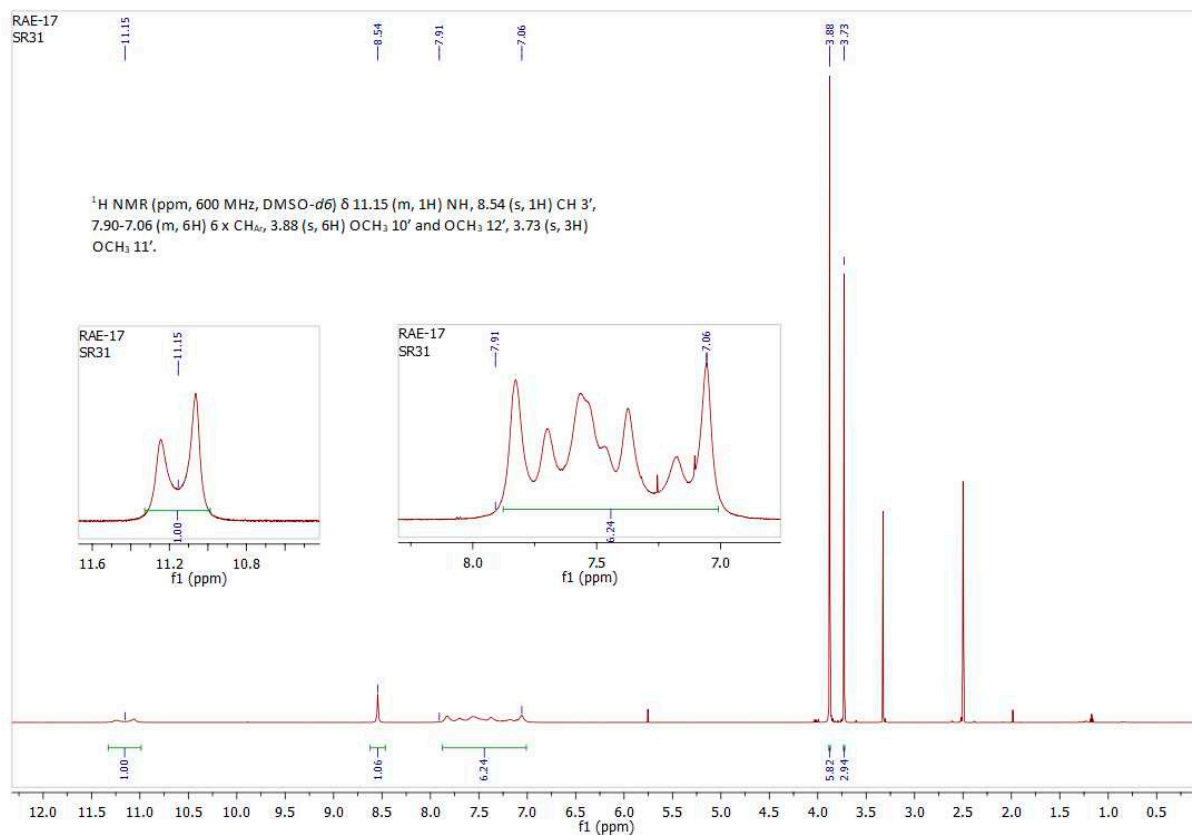

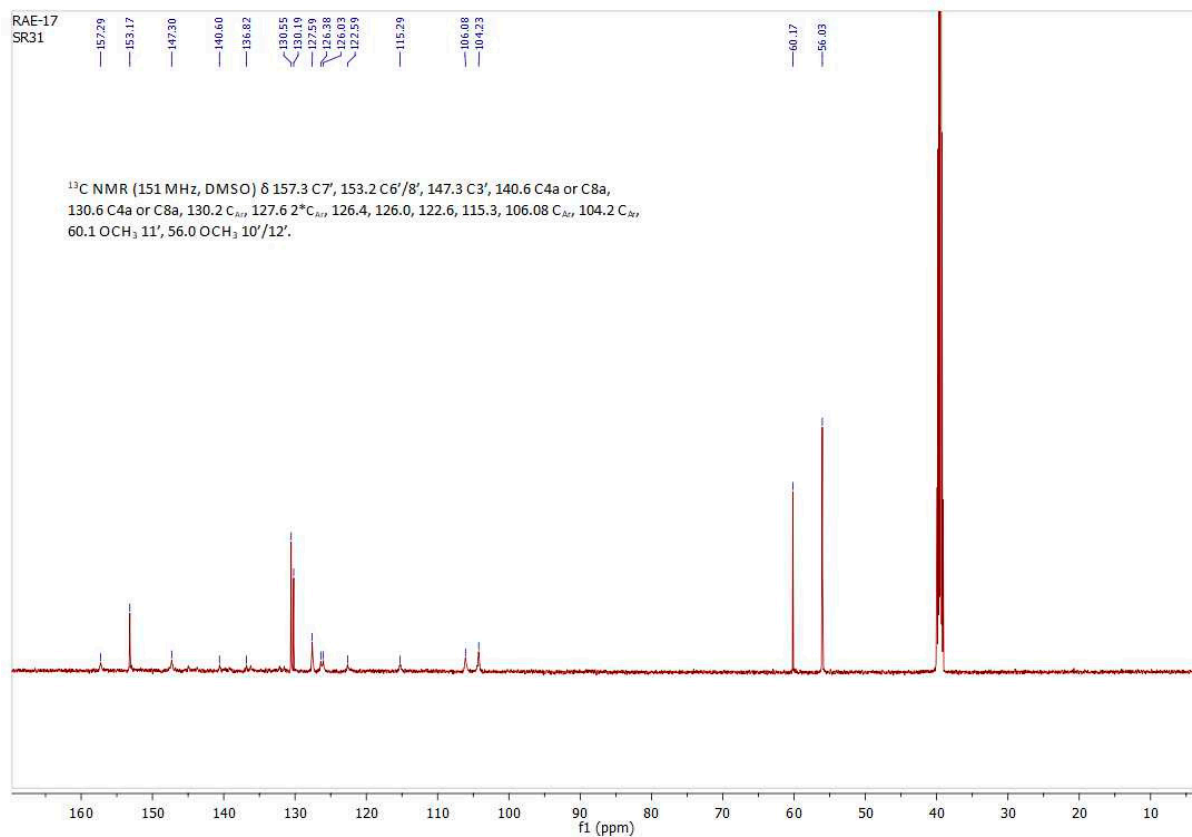

S11. 2-chloro-3-(2-(pyridin-3-ylmethylene)hydrazinyl)quinoxaline (**14e**).

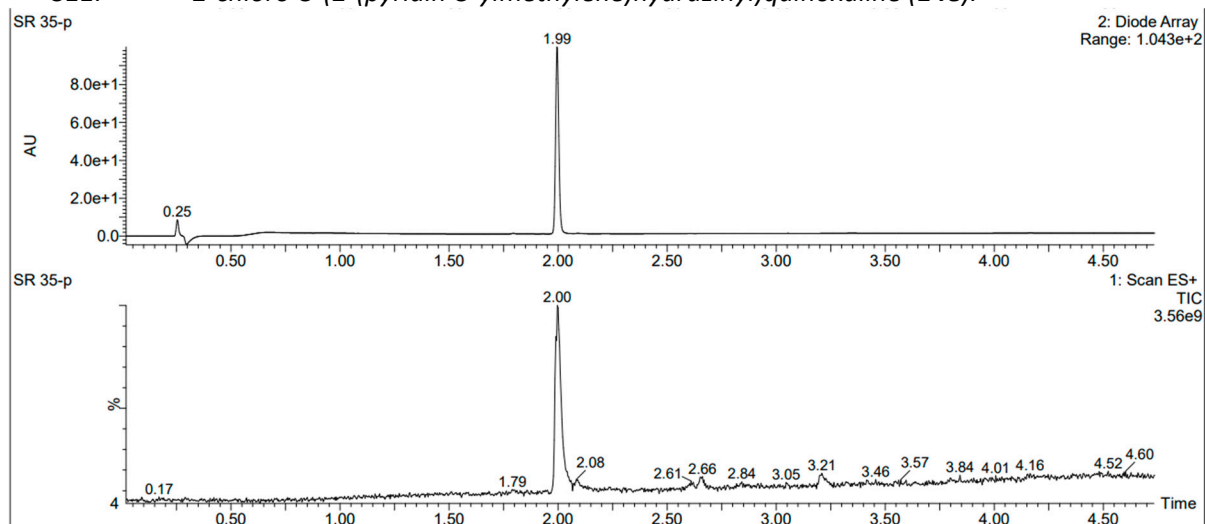

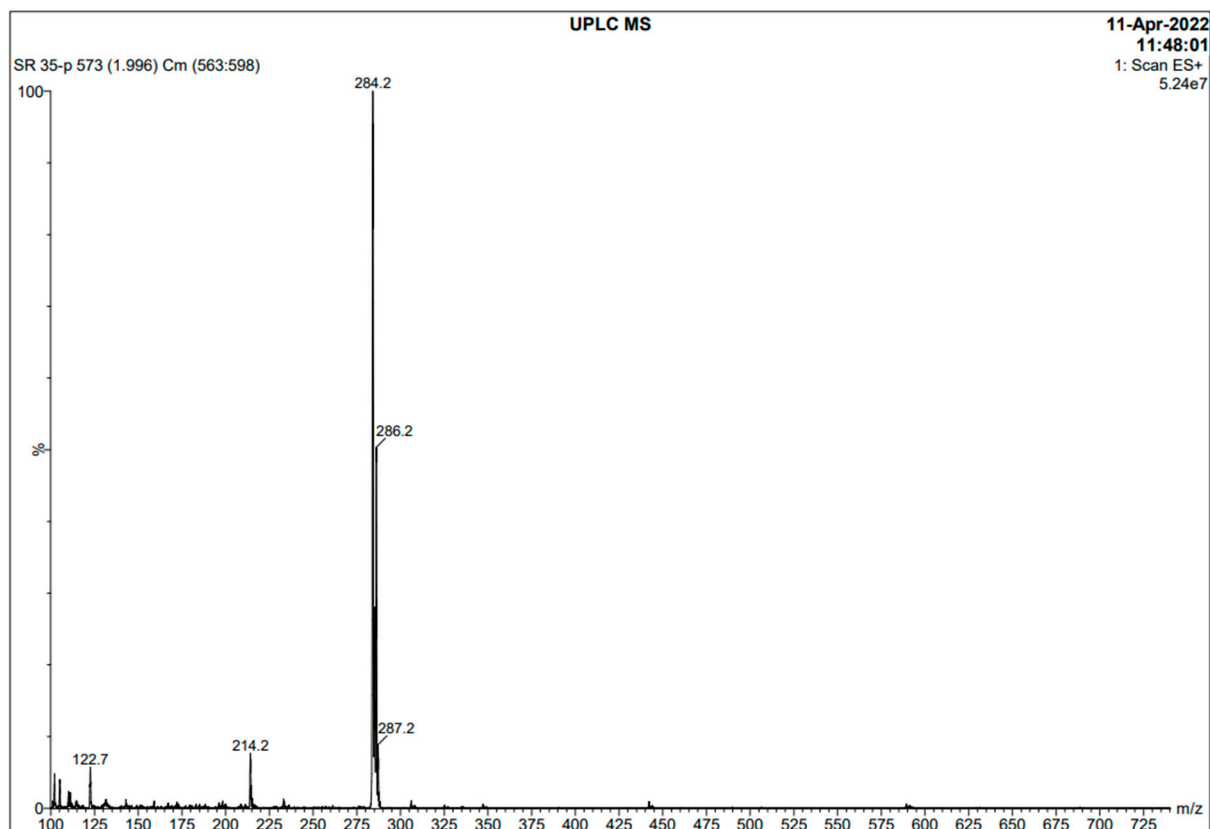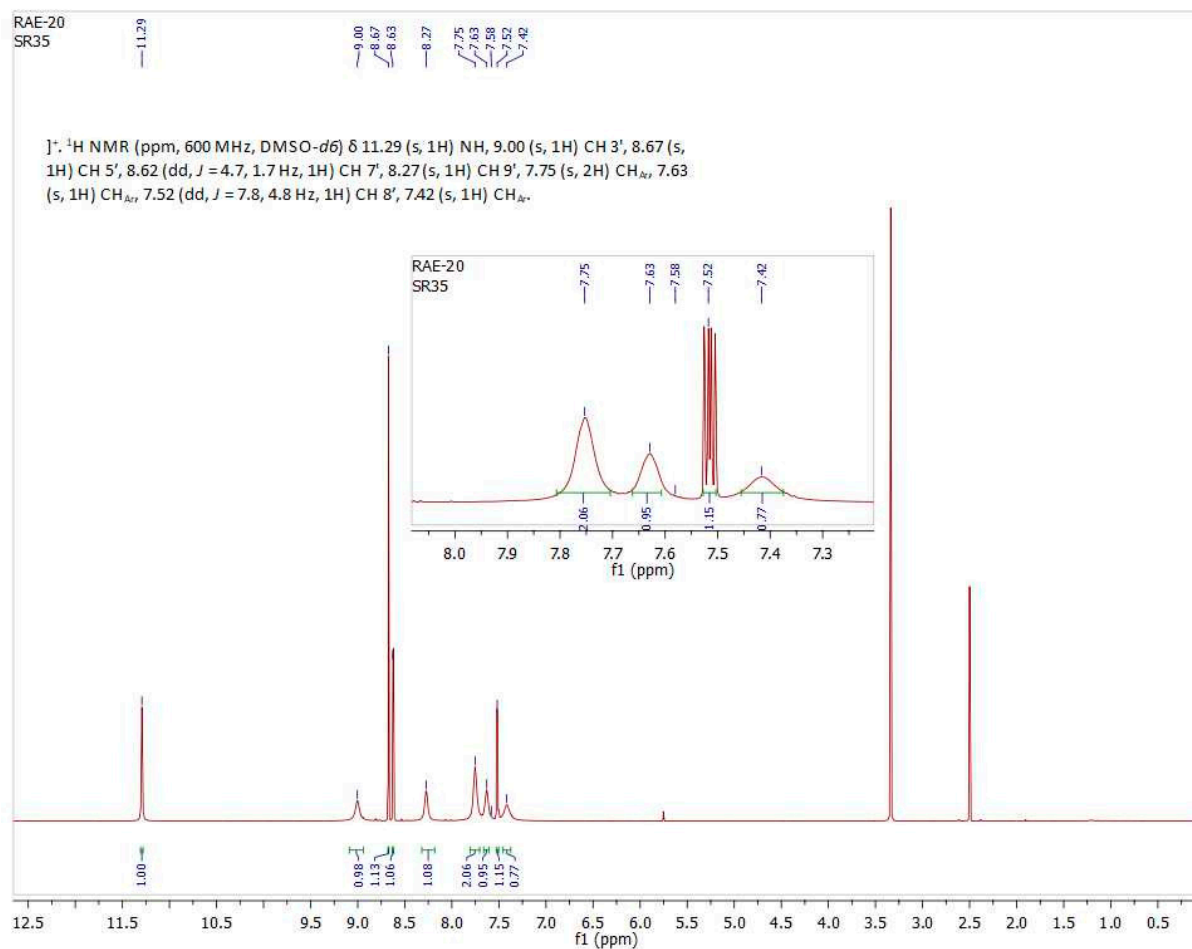



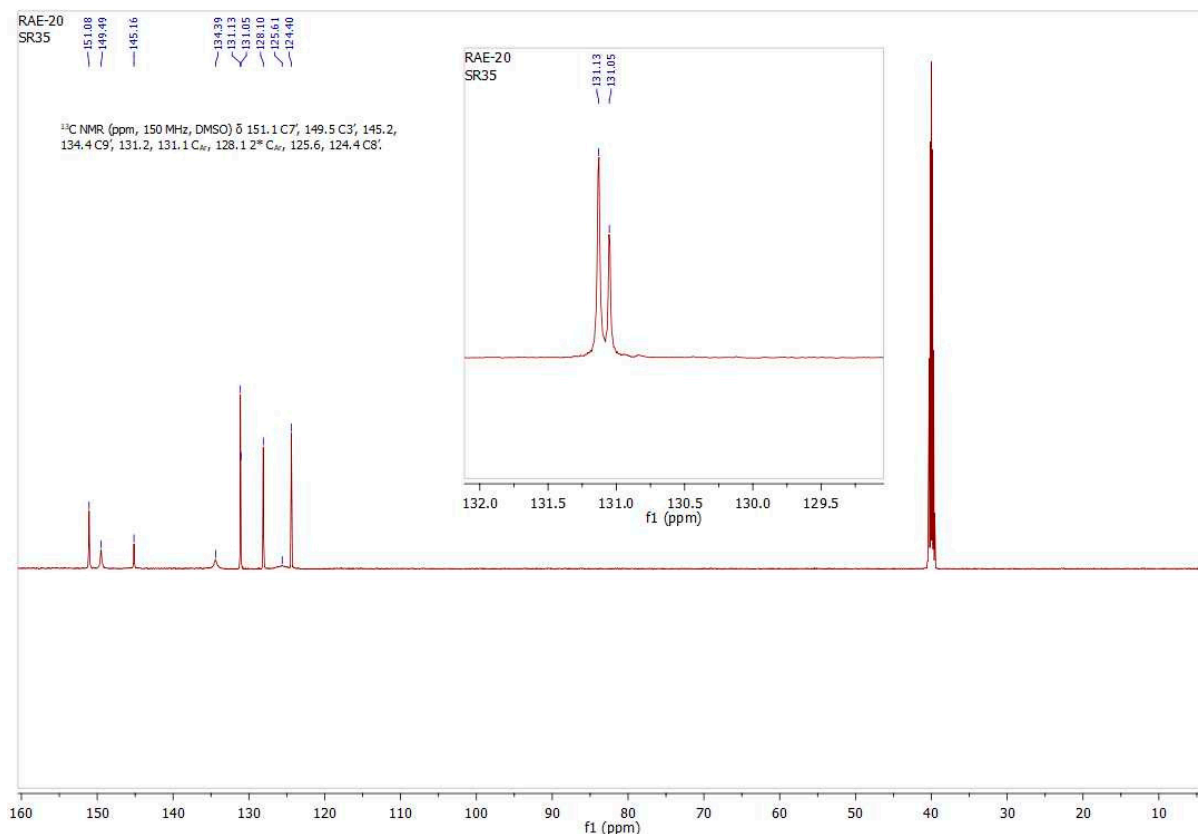

S12. 2-chloro-3-(2-(3-phenylpropylidene)hydrazinyl)quinoxaline (**14f**).

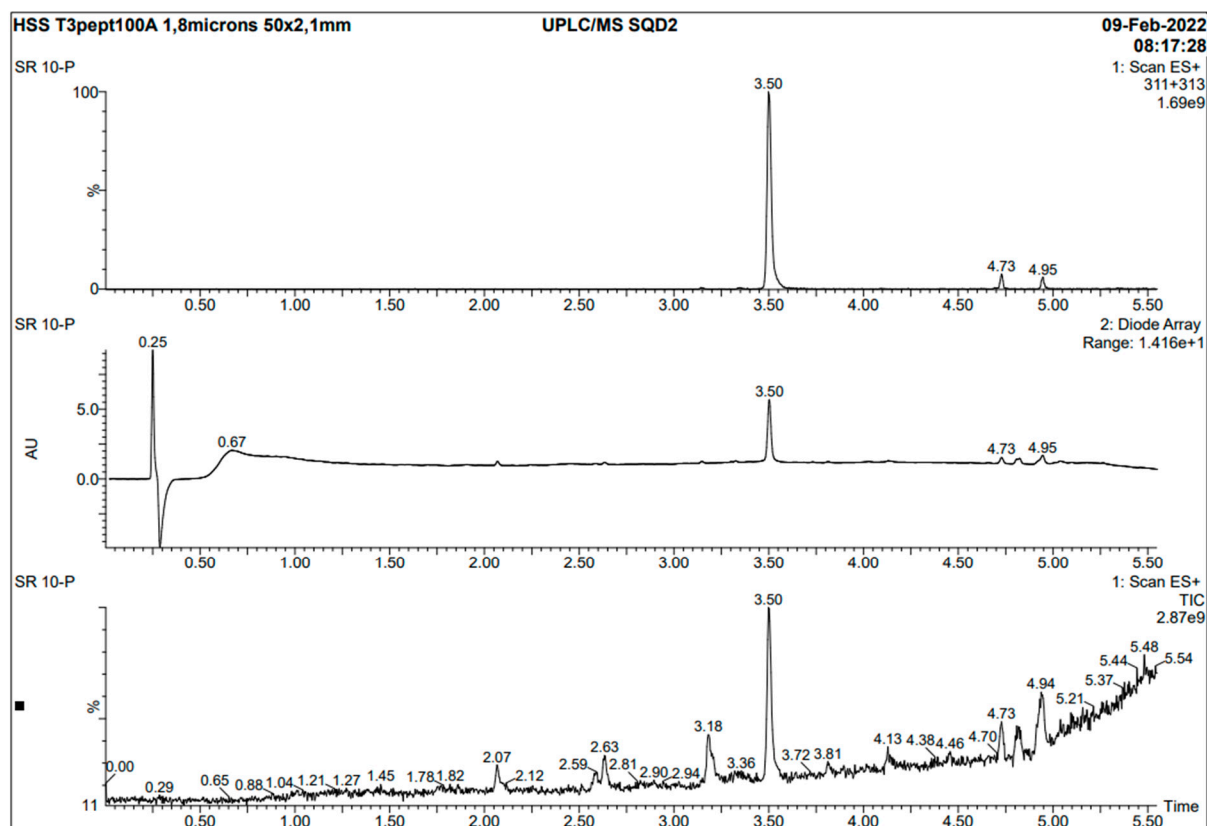

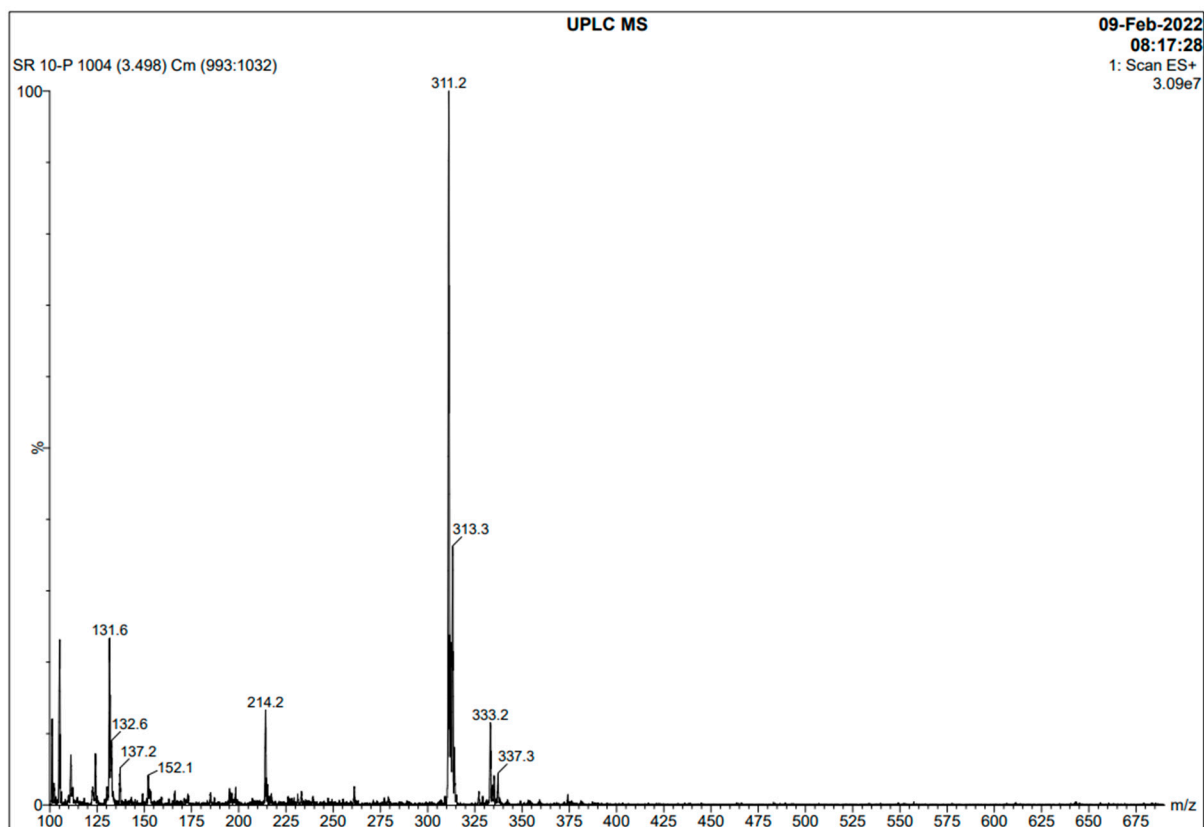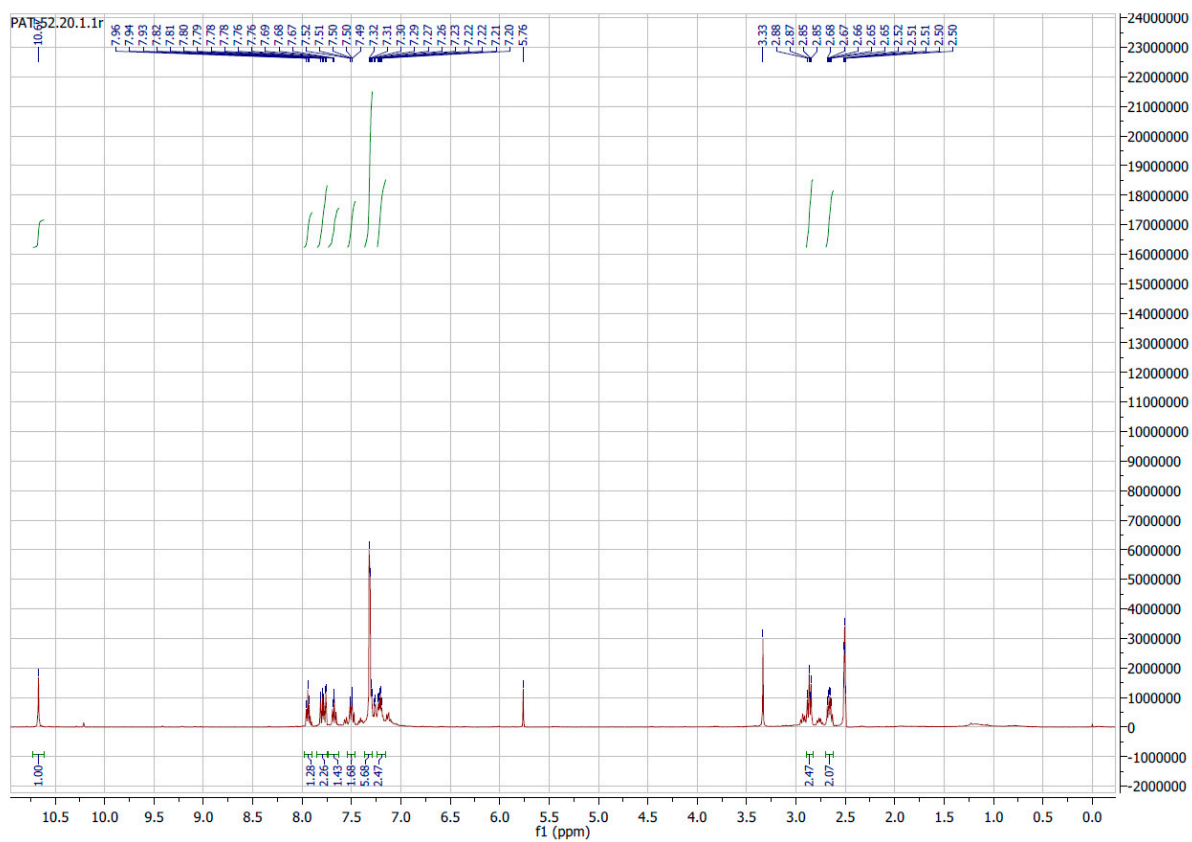

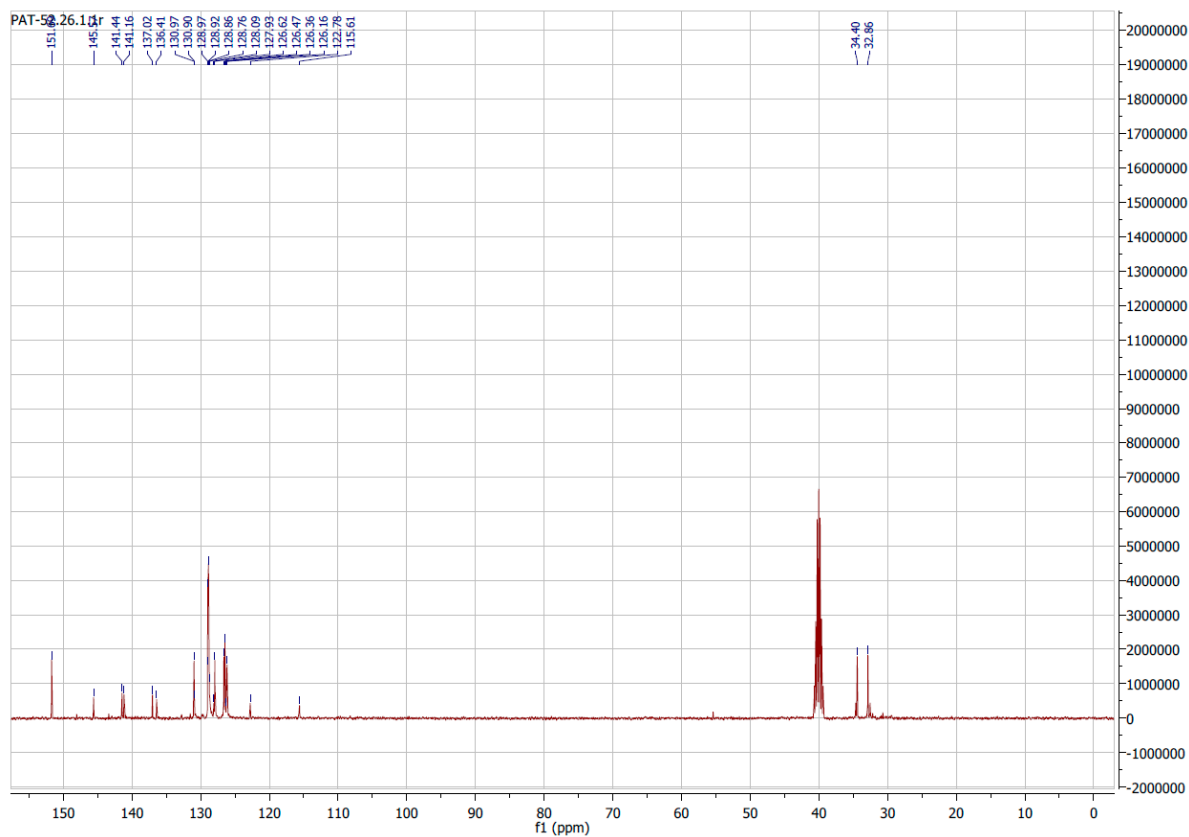

S13. 2-chloro-3-(2-pentylidenehydrazinyl)quinoxaline (14g).

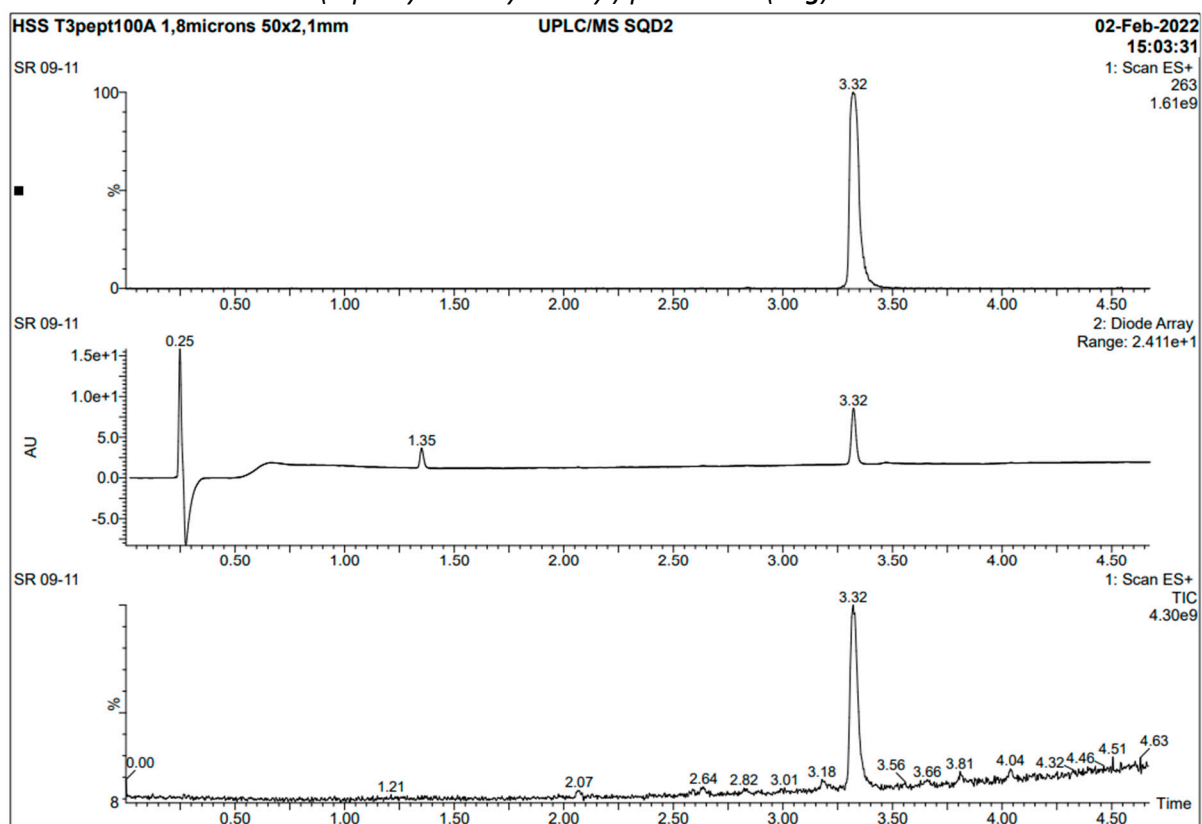

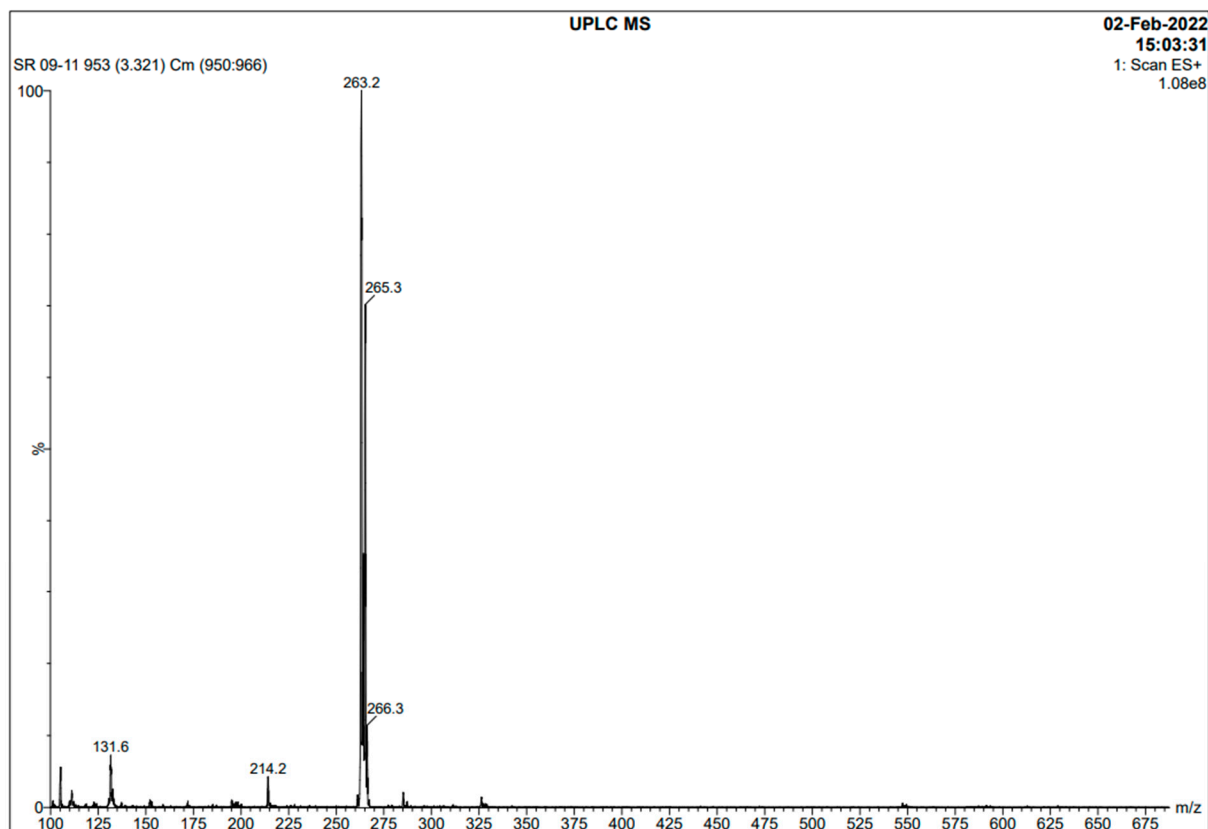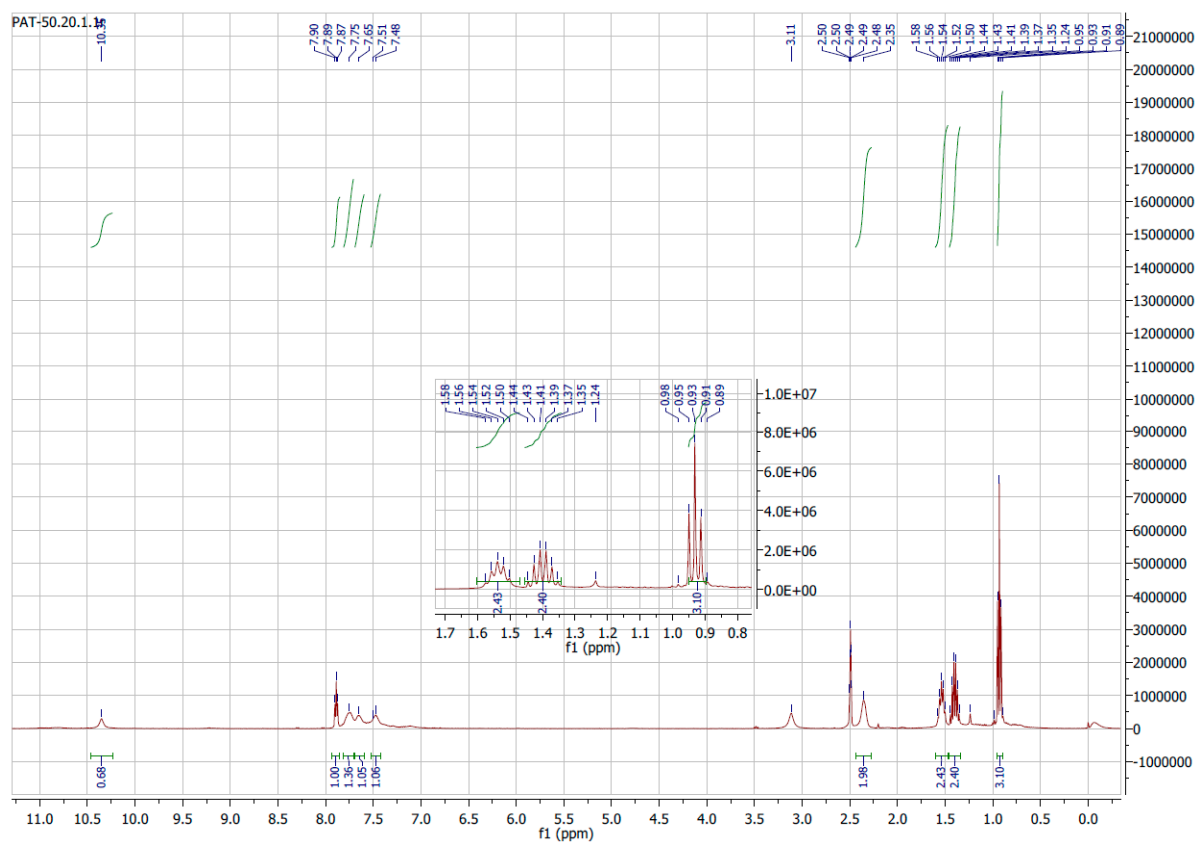

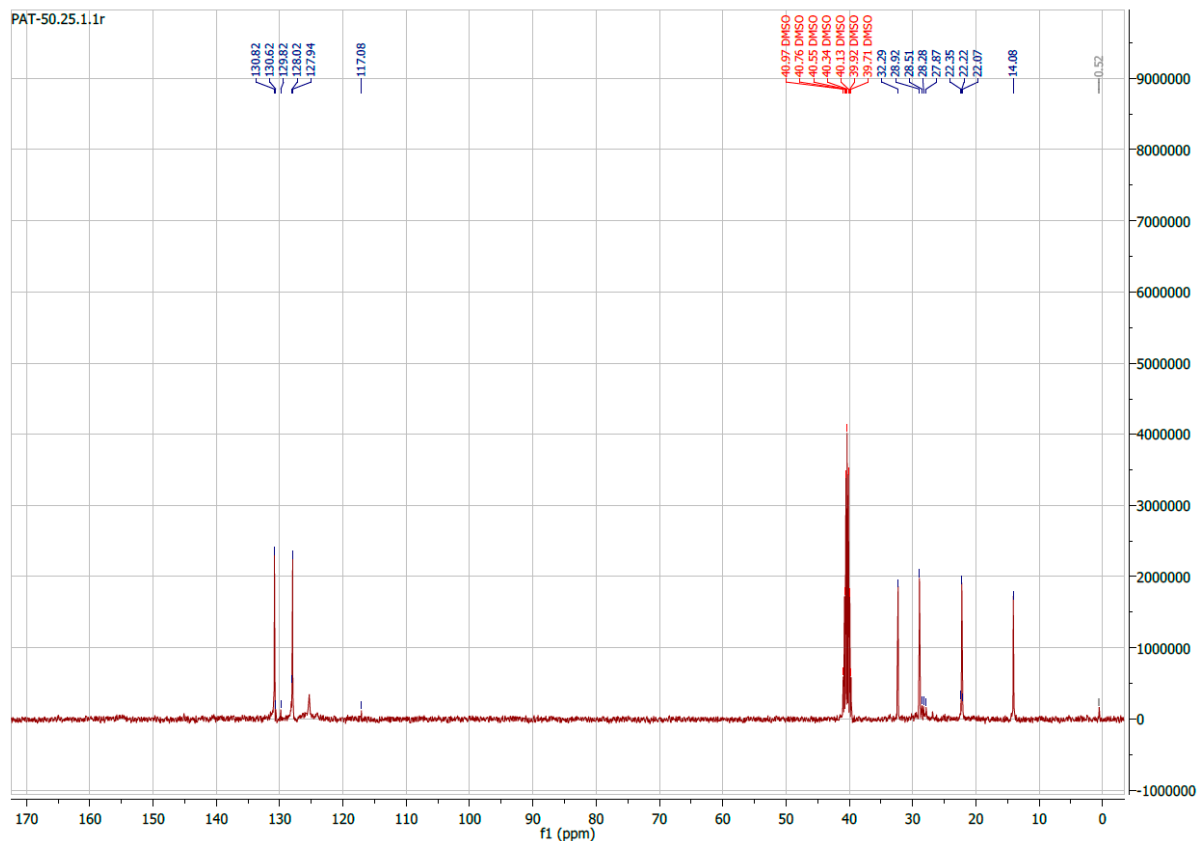

S14. 2-chloro-3-(2-(3-methylbutylidene)hydrazinyl)quinoxaline (**14h**).

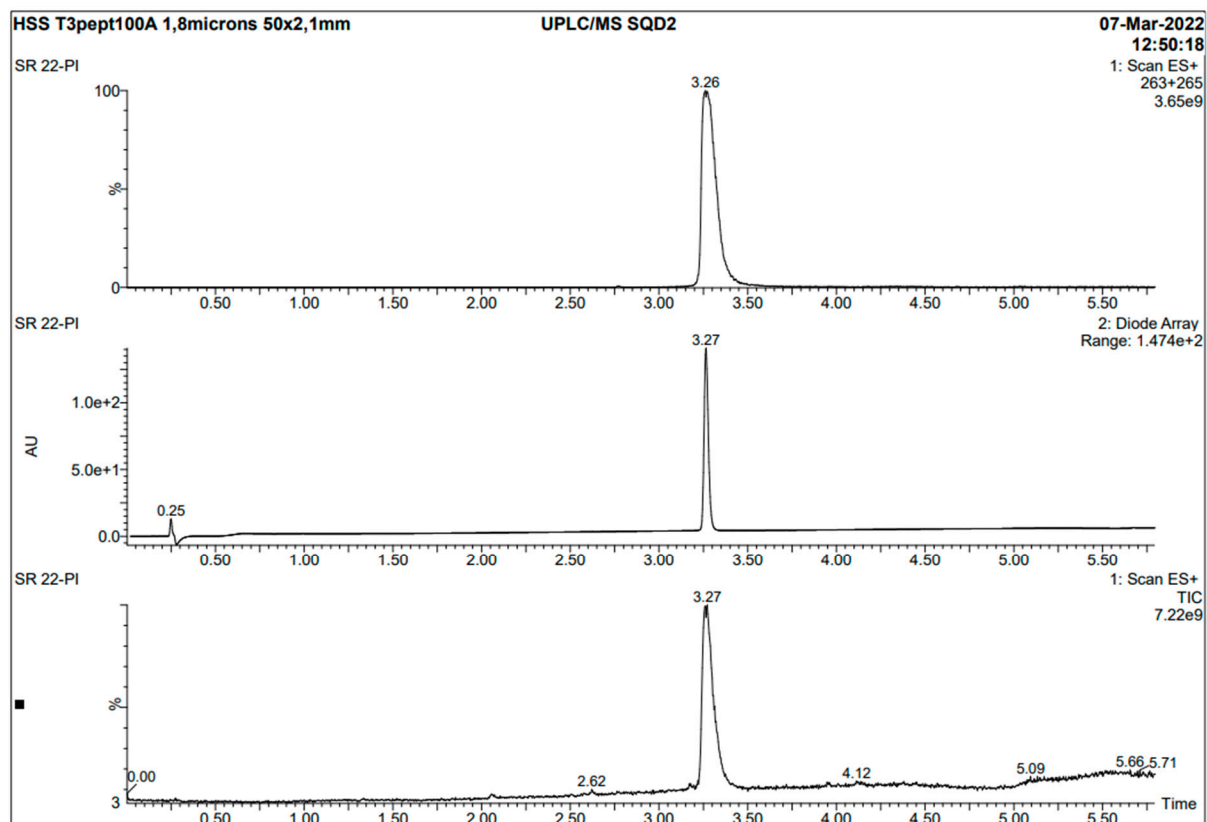

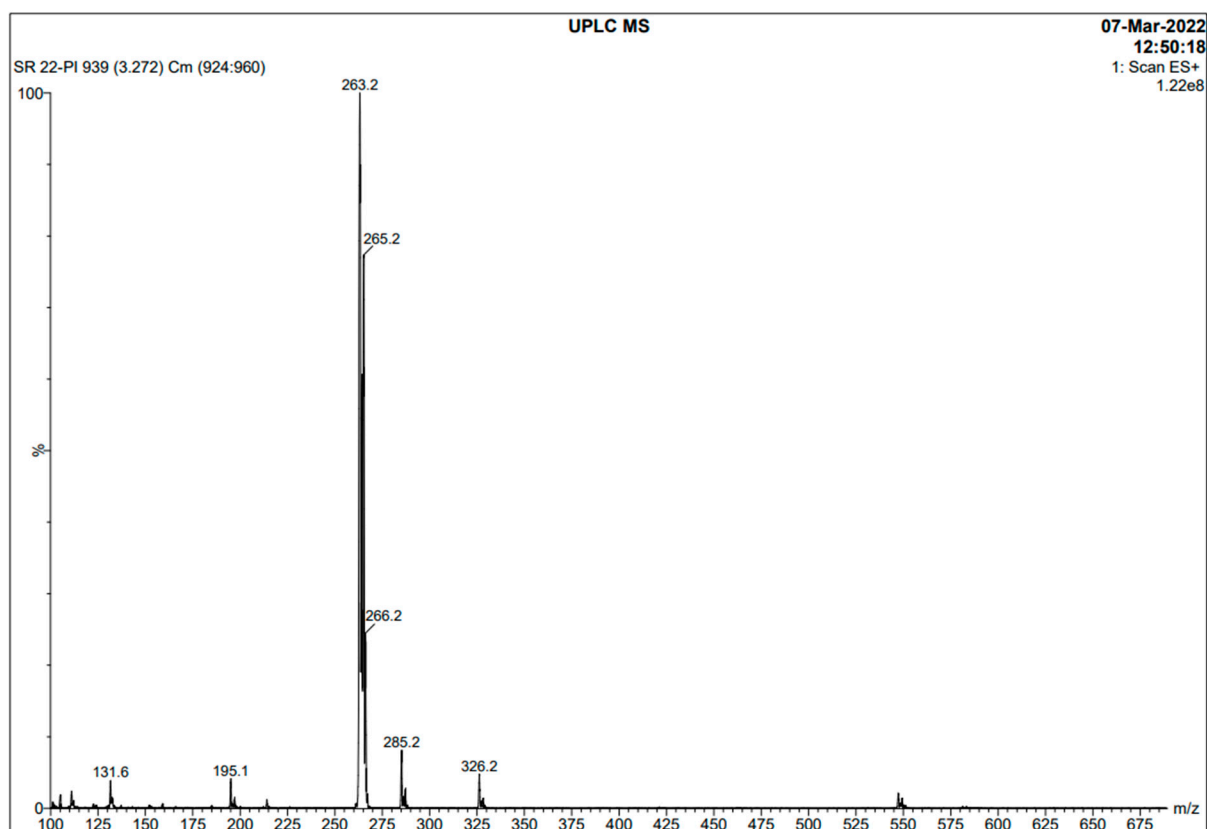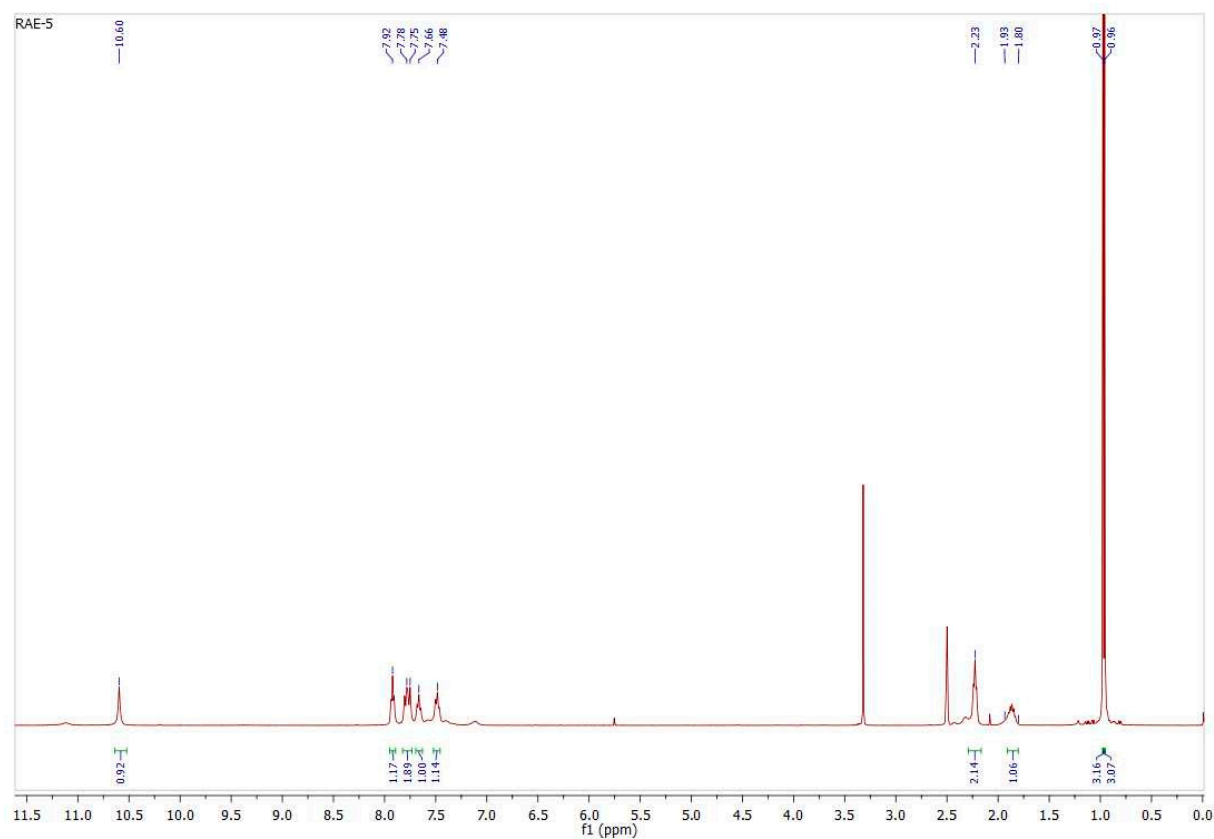

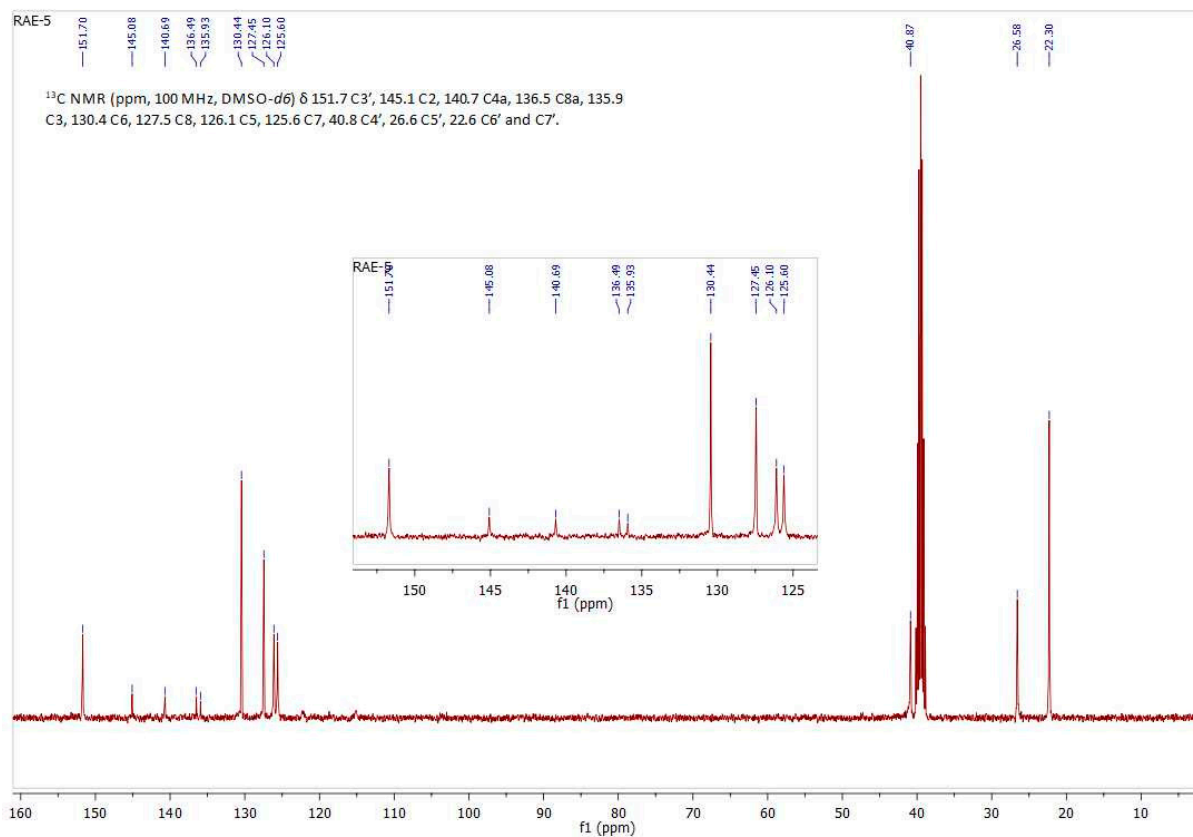

S15. 2-chloro-3-(2-ethylidenehydrazinyl)quinoxaline (**14i**).

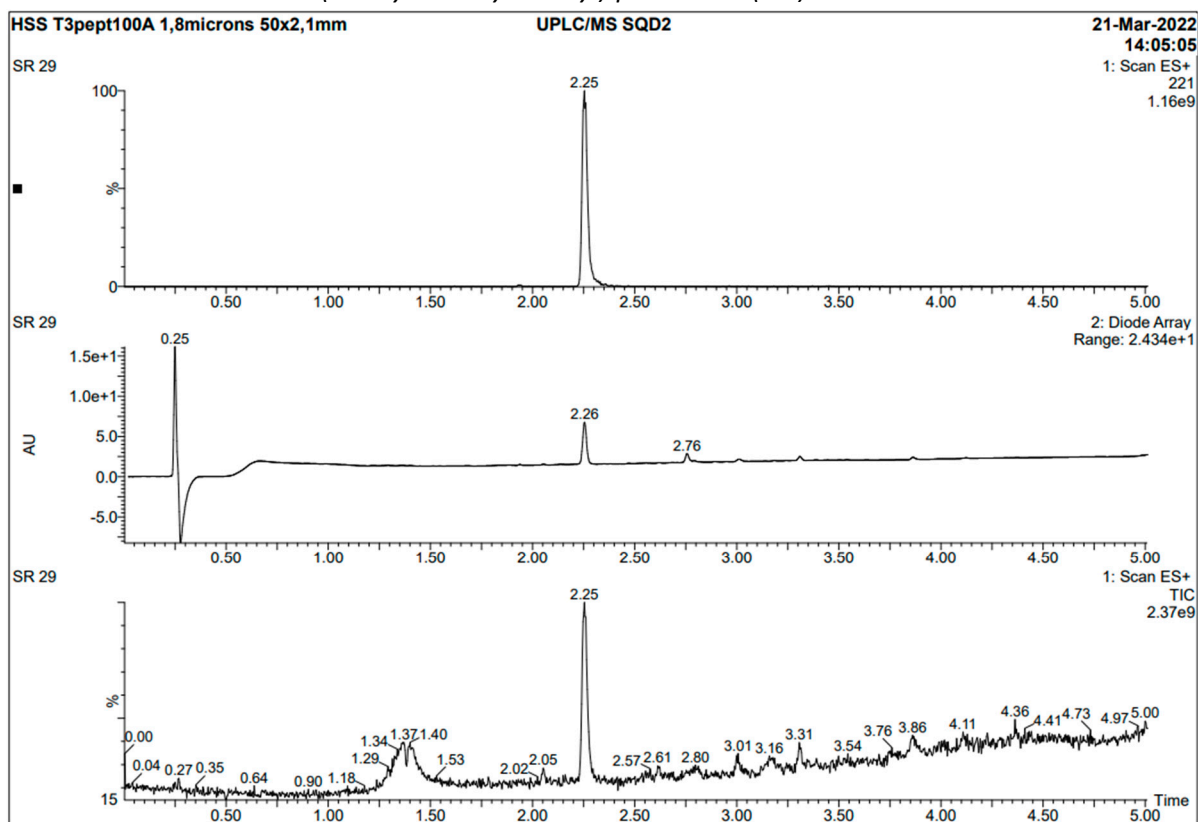

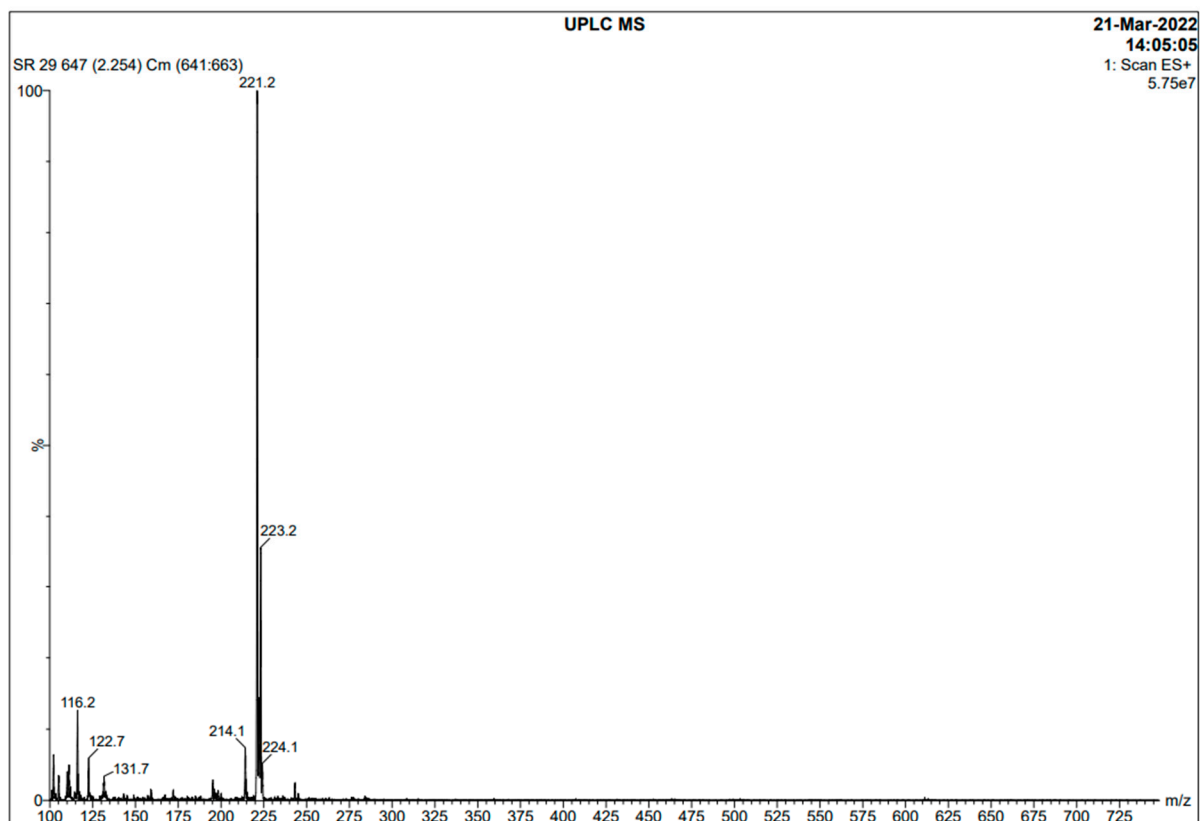

S16. 4-chloro-1-(3,4-dimethoxyphenyl)-[1,2,4]triazolo[4,3-a]quinoxaline (**15a**).

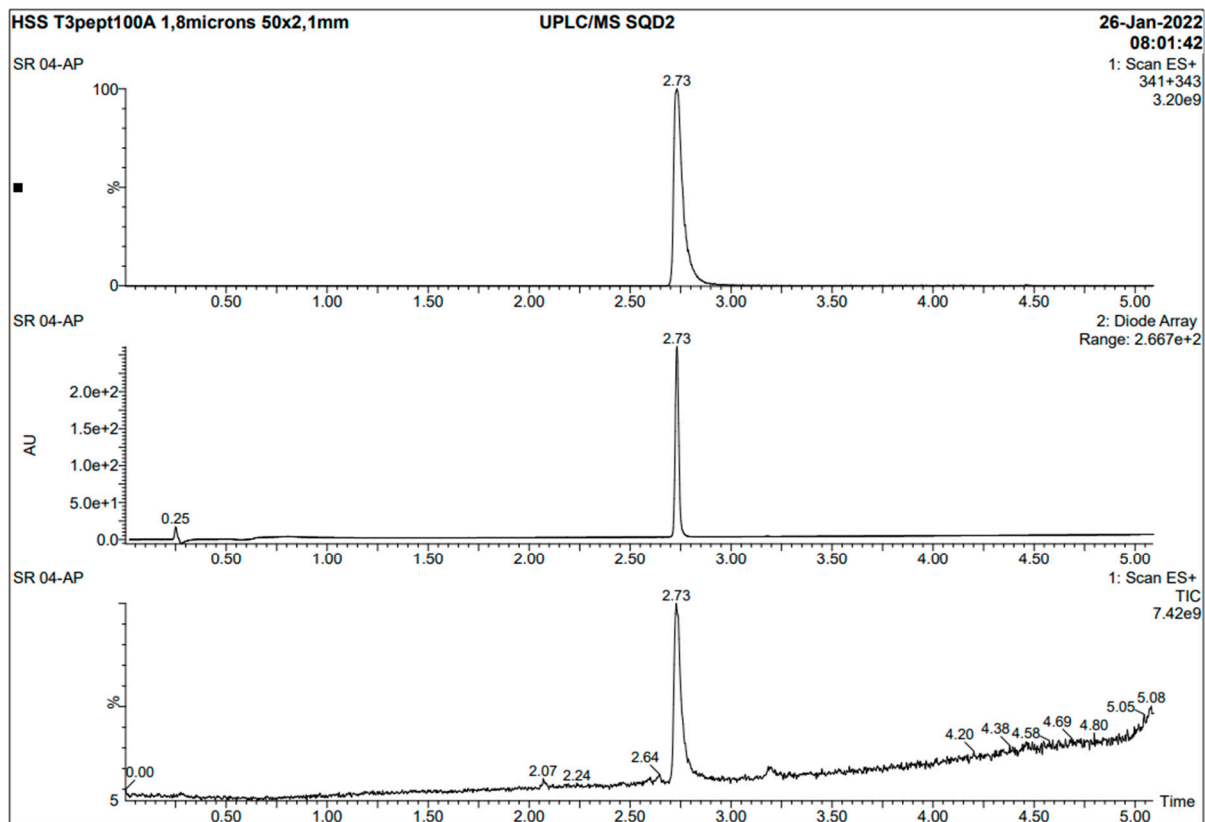



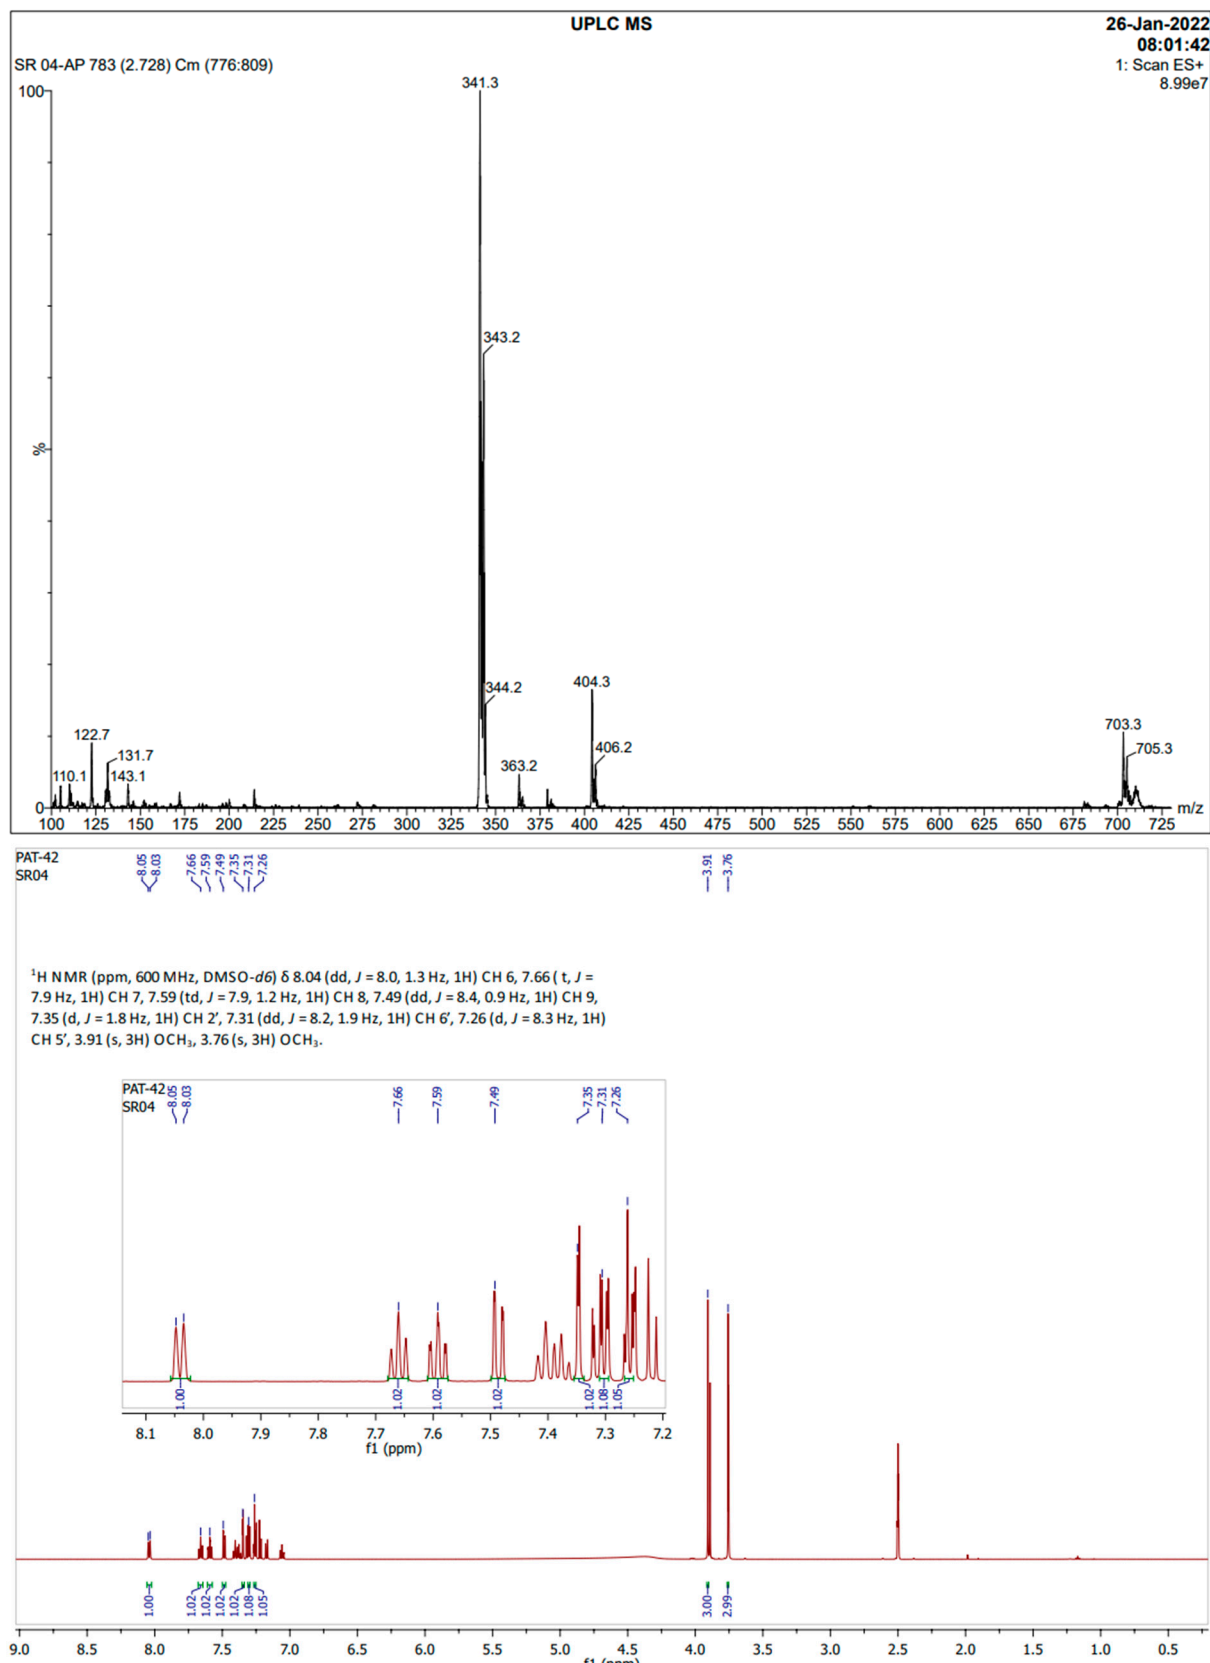

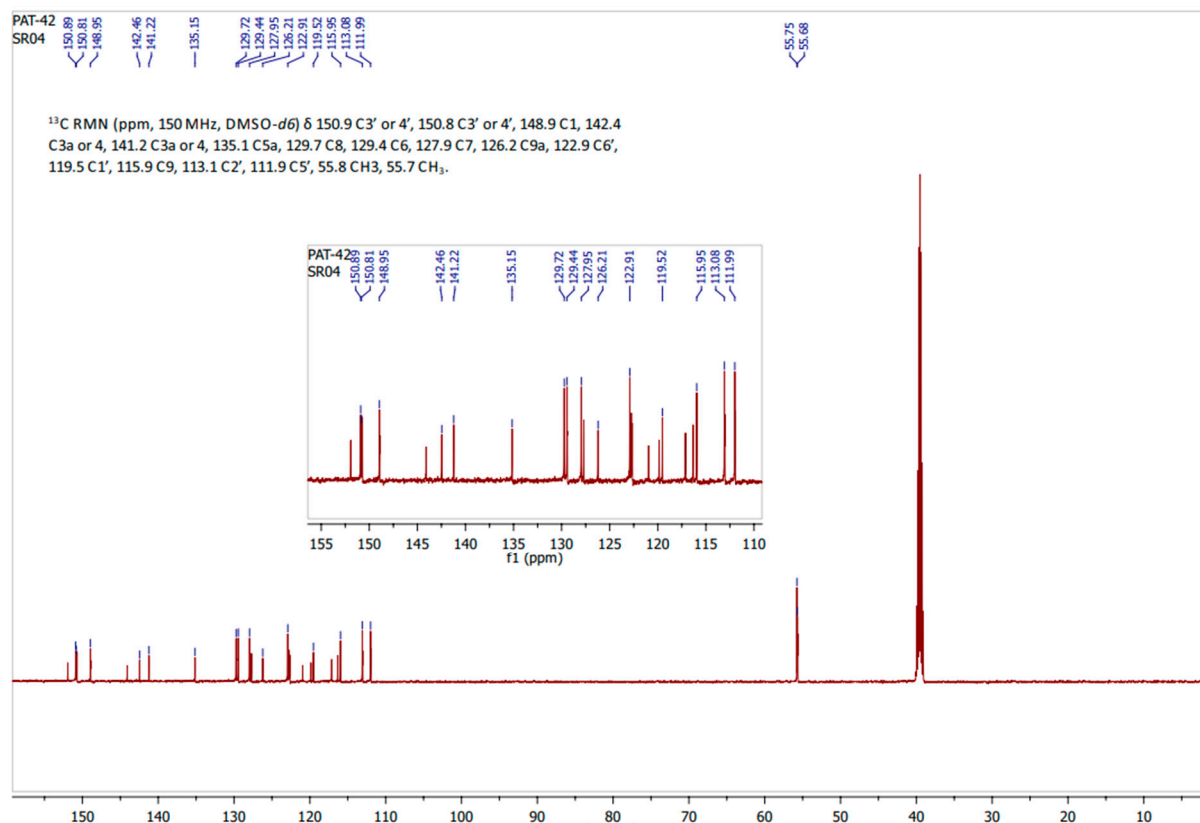

S17. 4-chloro-1-(3-methoxyphenyl)-[1,2,4]triazolo[4,3-a]quinoxaline (**15b**).

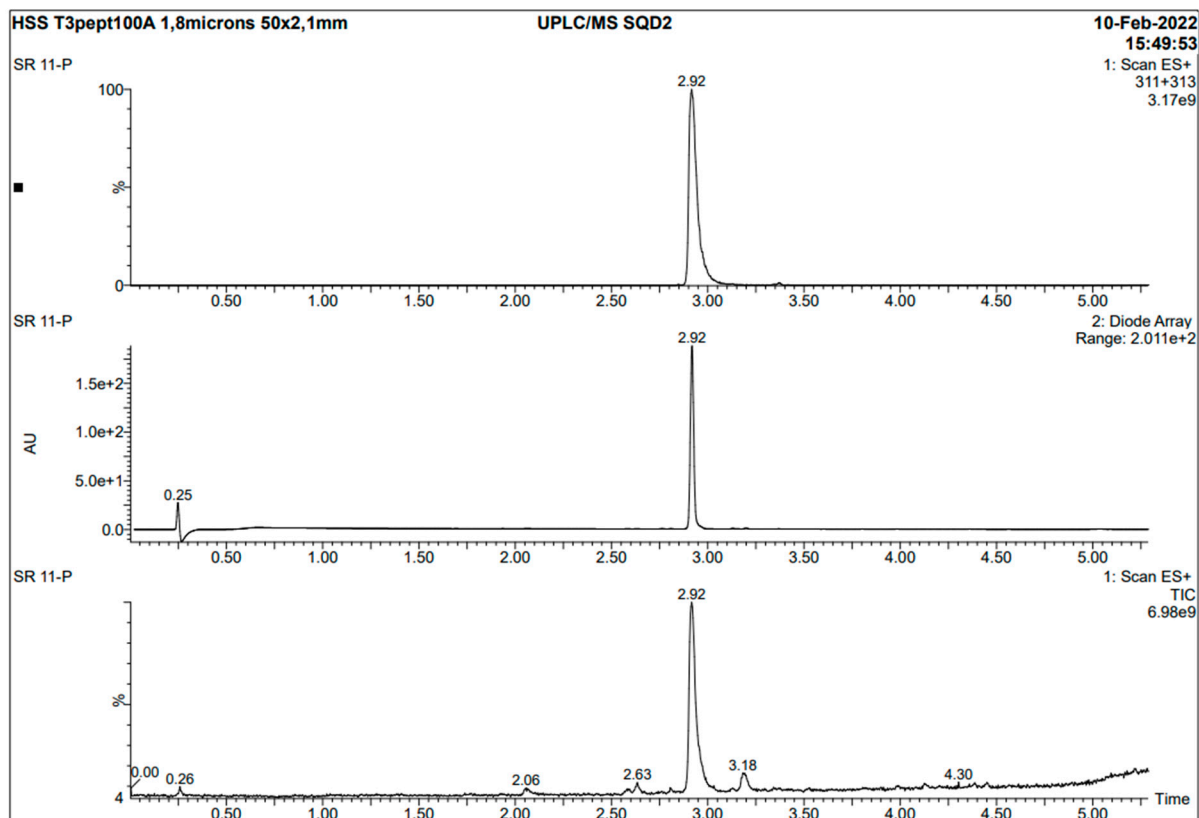

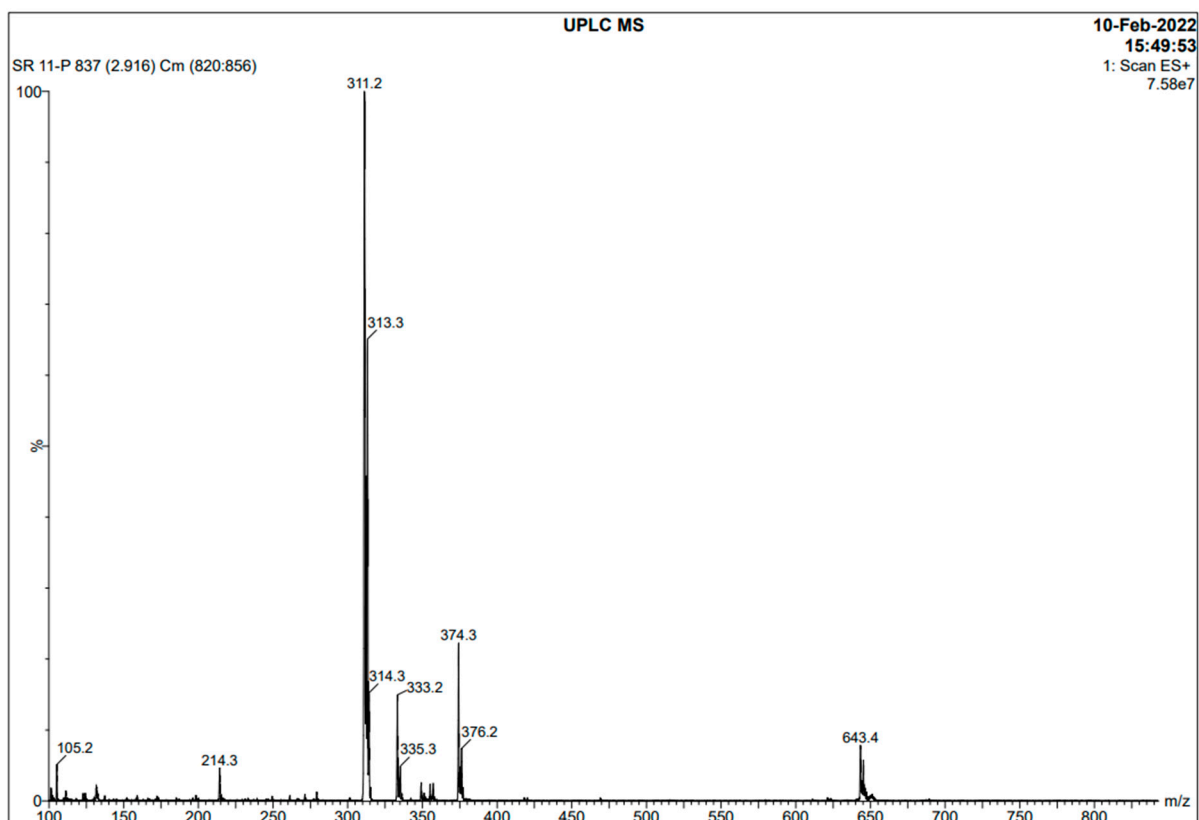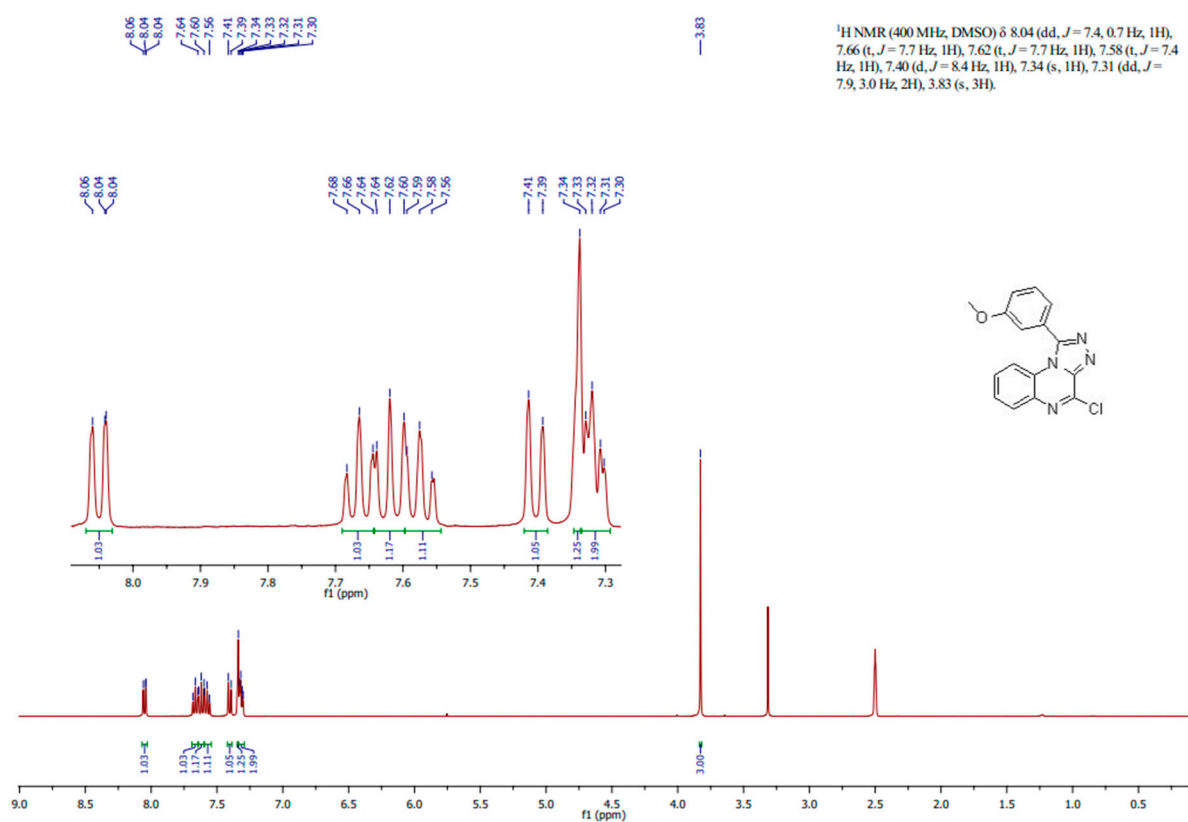

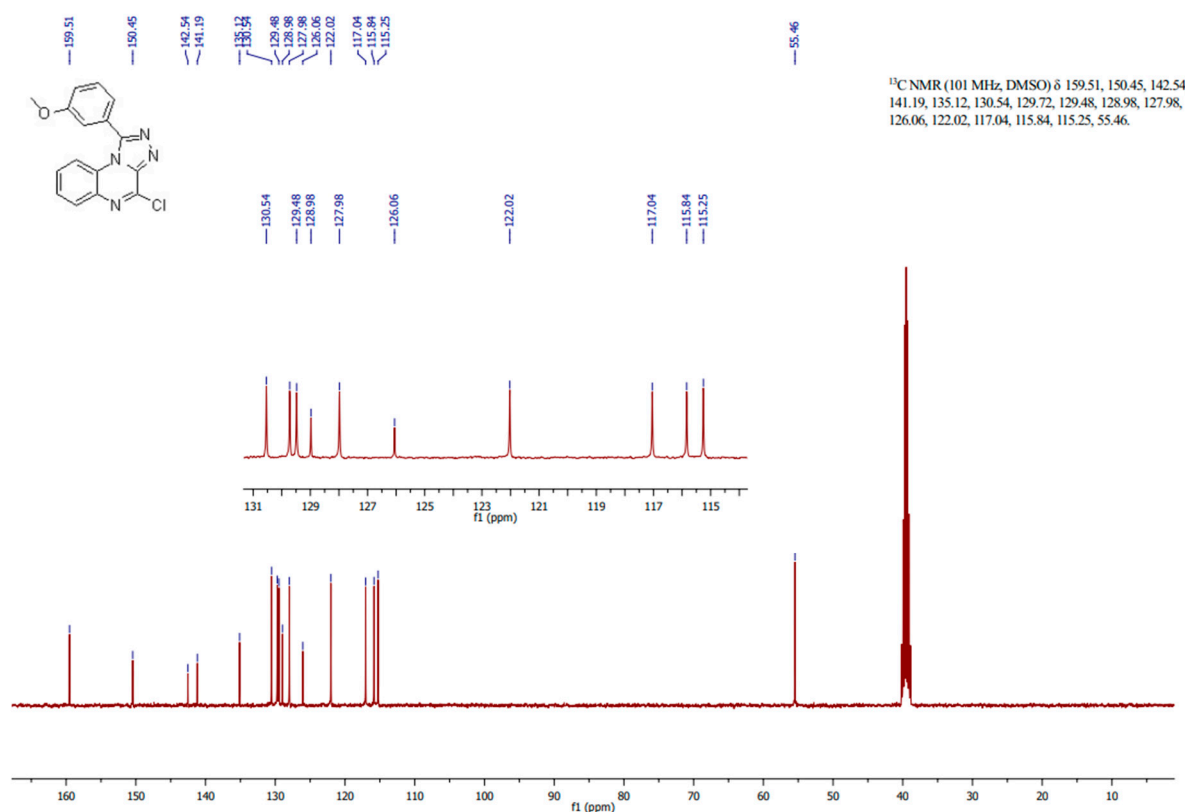

S18. 4-chloro-1-phenyl-[1,2,4]triazolo[4,3-a]quinoxaline (15c).

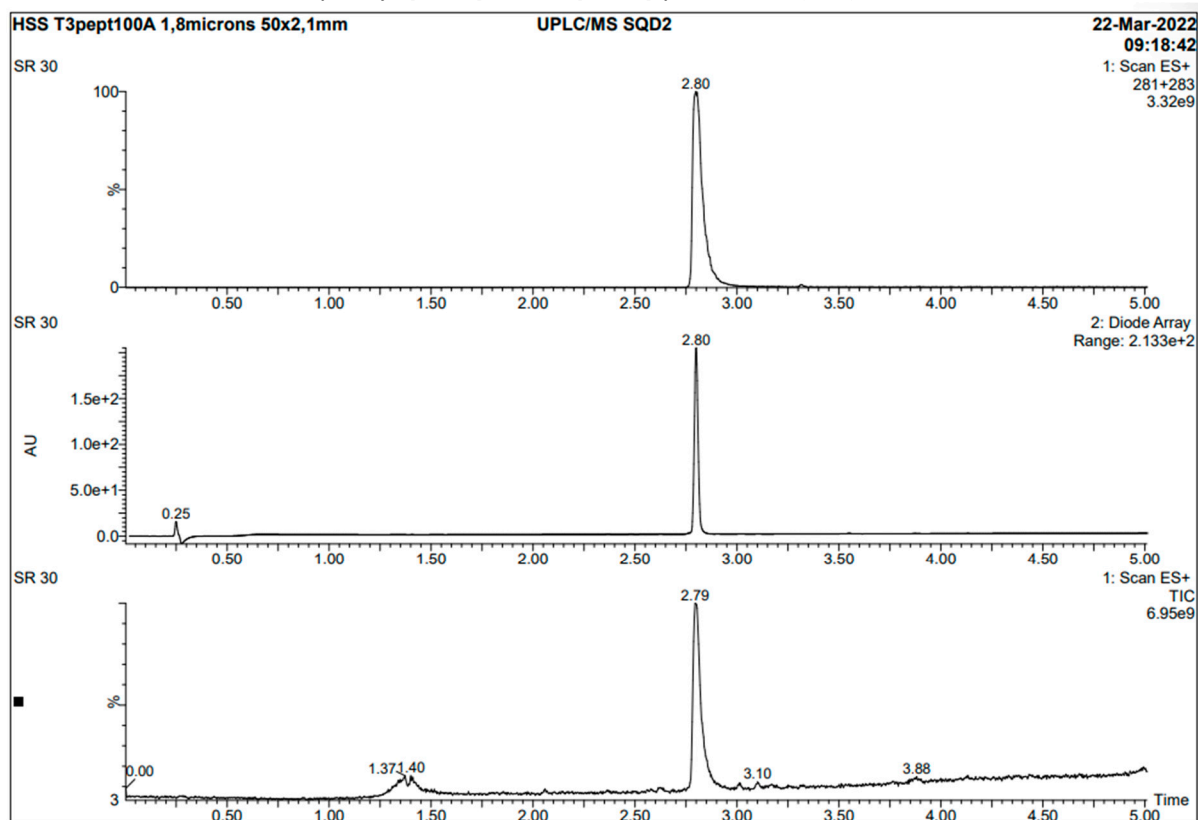

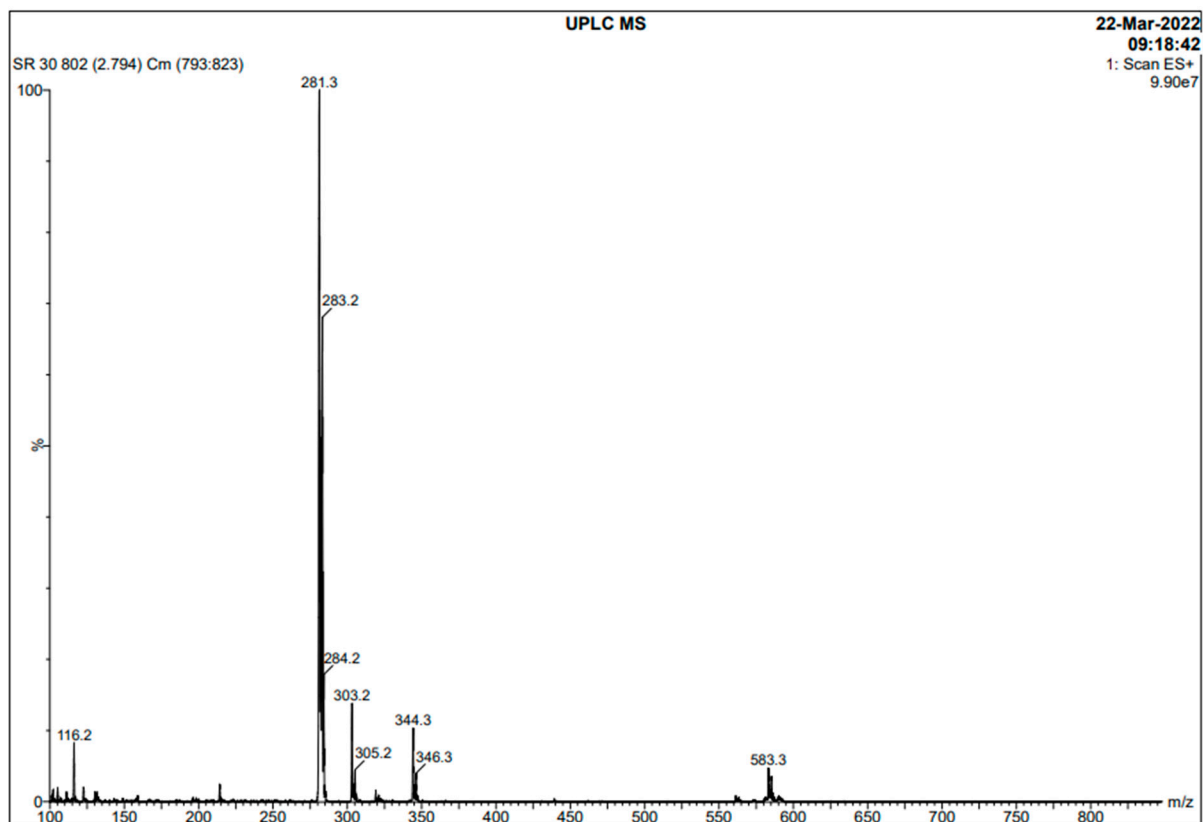

RAE-14

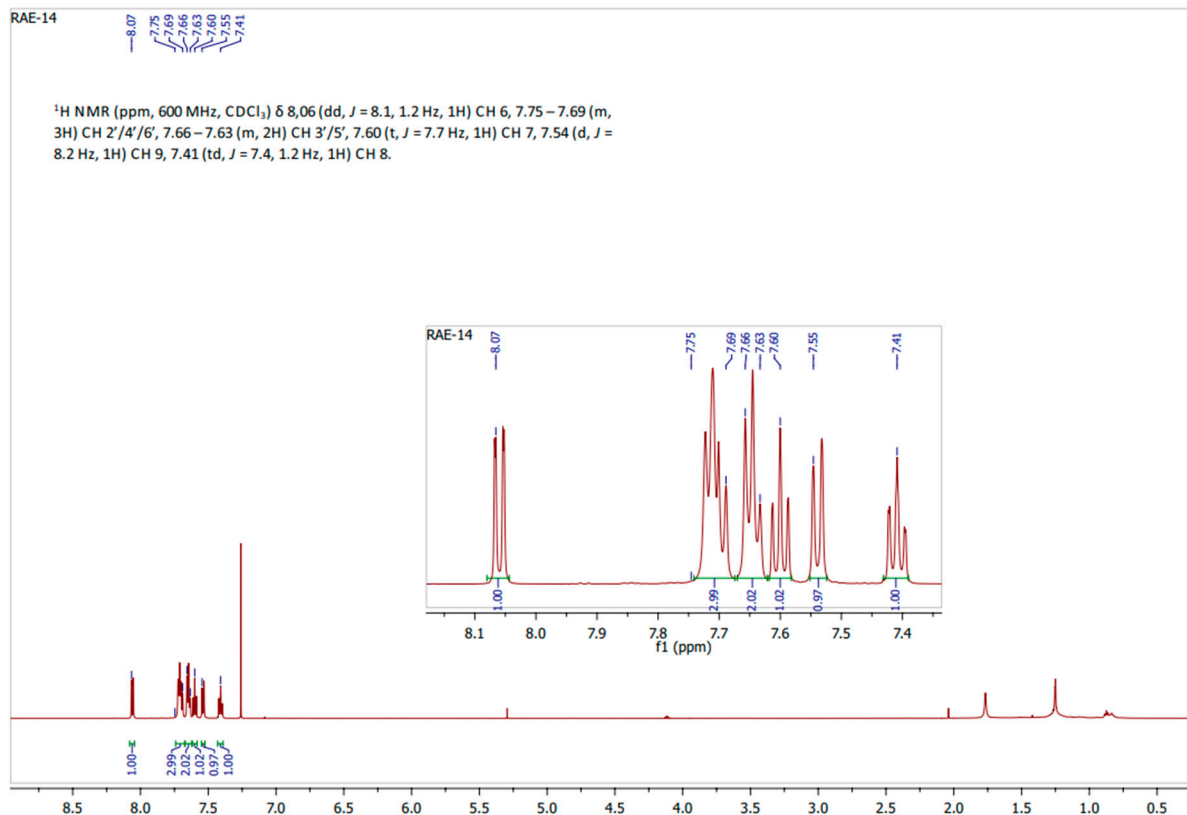

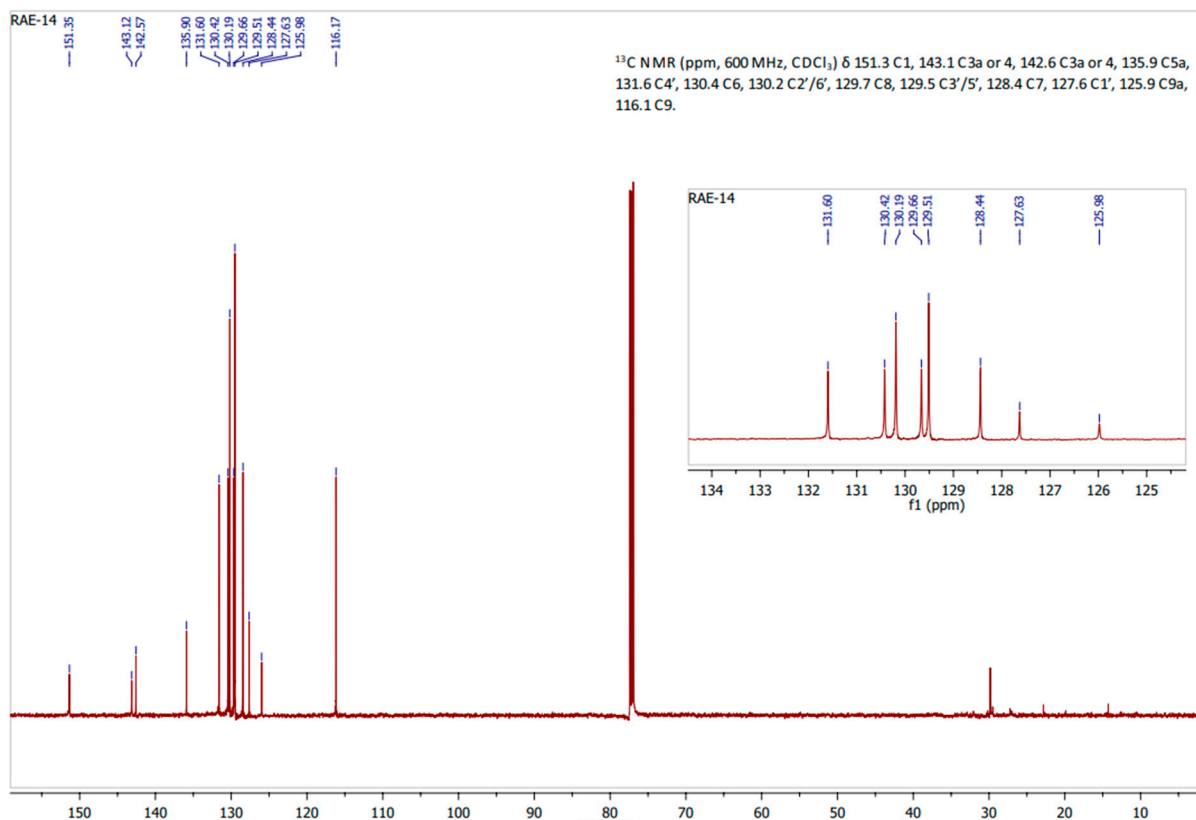

S19. 4-chloro-1-(3,4,5-trimethoxyphenyl)-[1,2,4]triazolo[4,3-a]quinoxaline (**15d**).

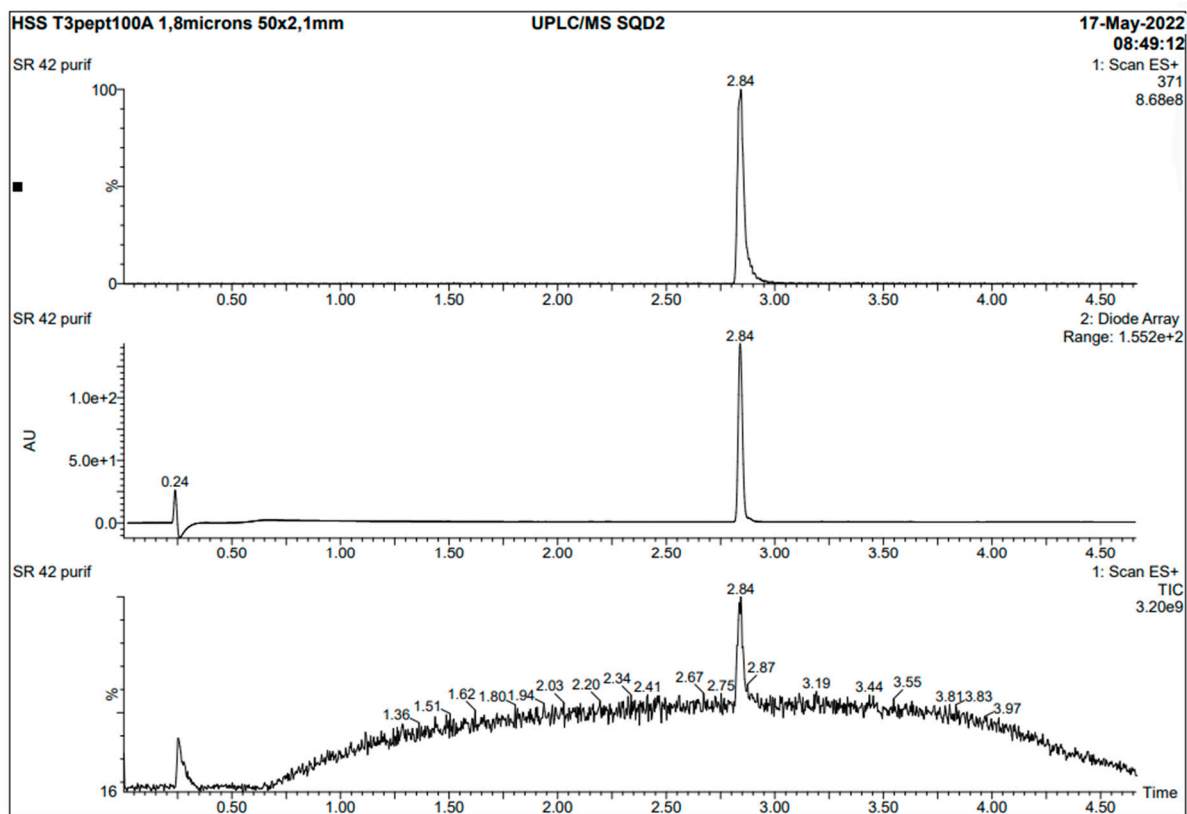

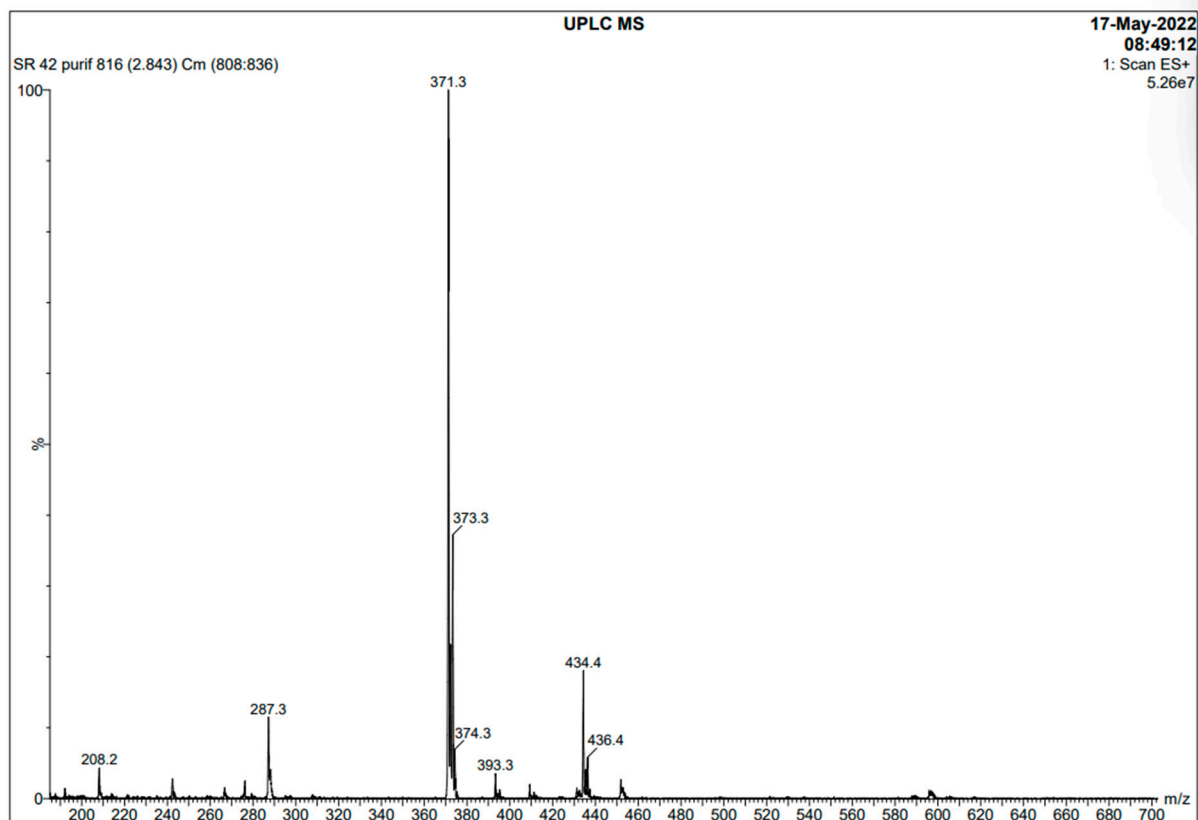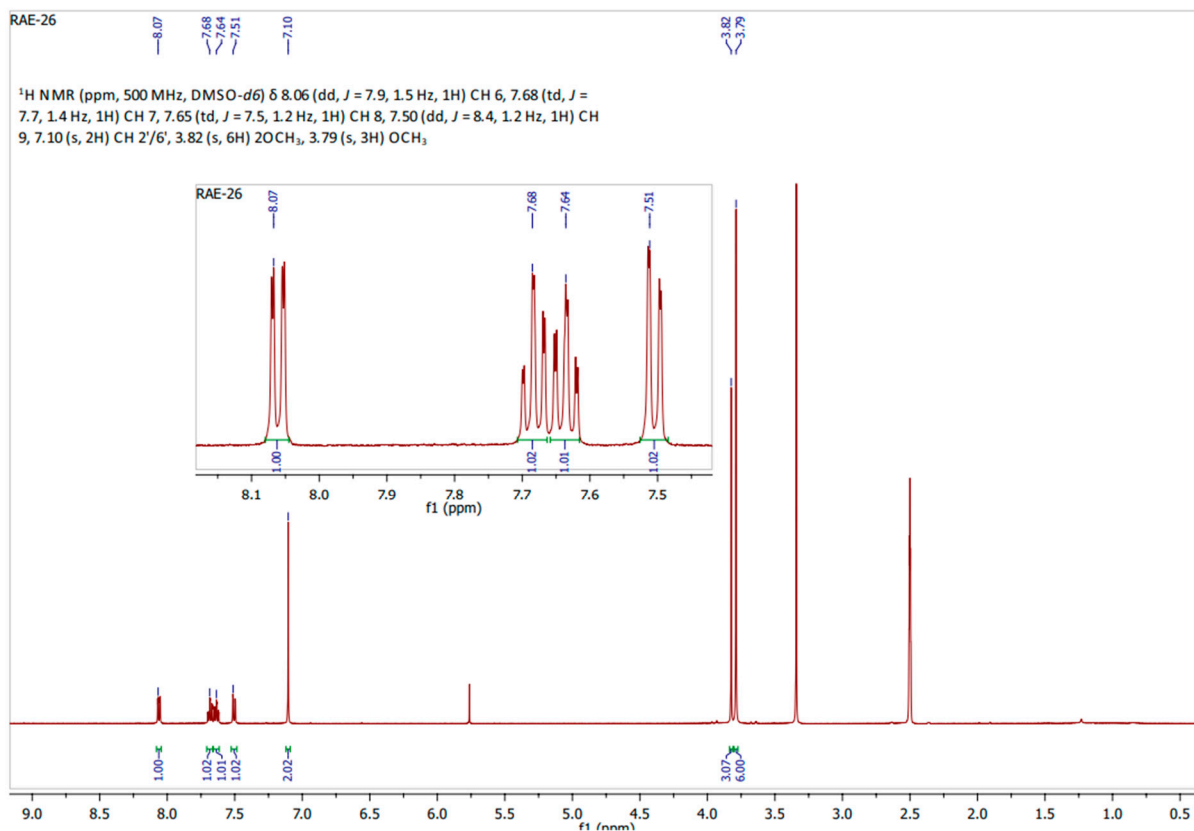

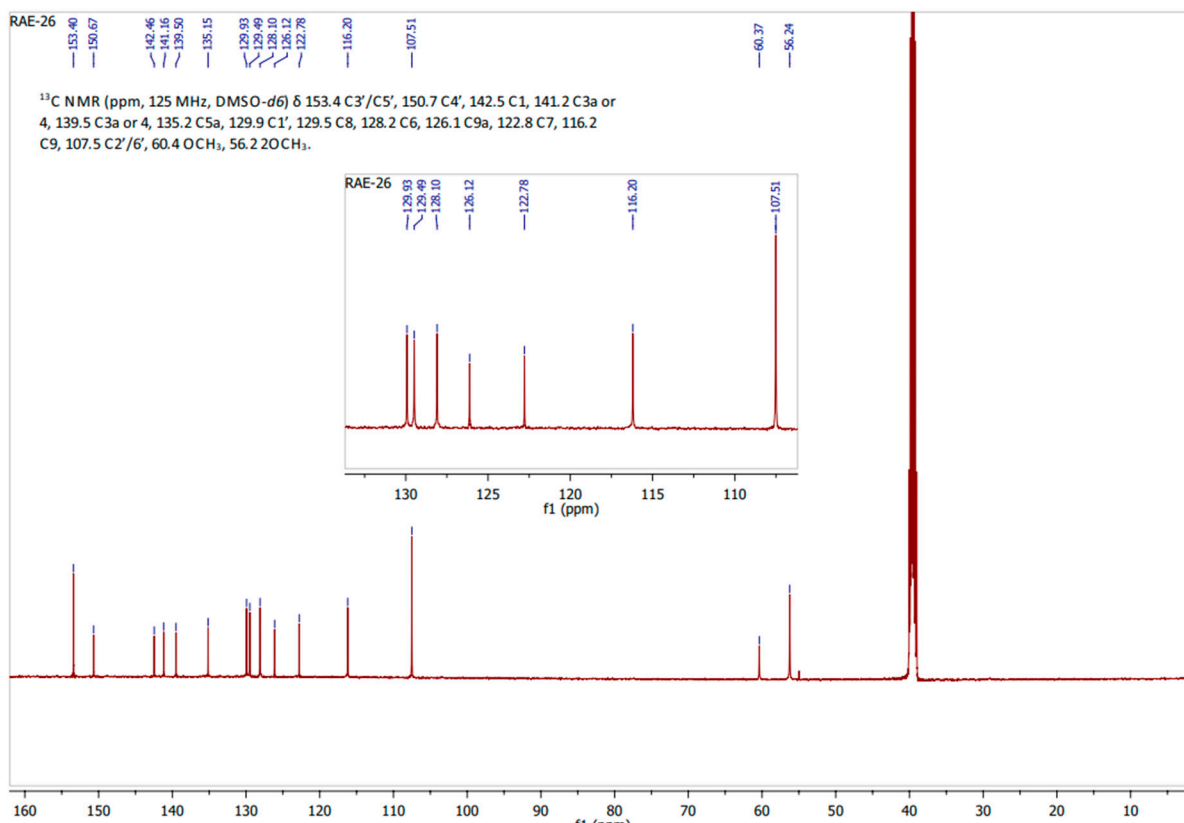

S20. 4-chloro-1-(pyridin-3-yl)-[1,2,4]triazolo[4,3-a]quinoxaline (15e).

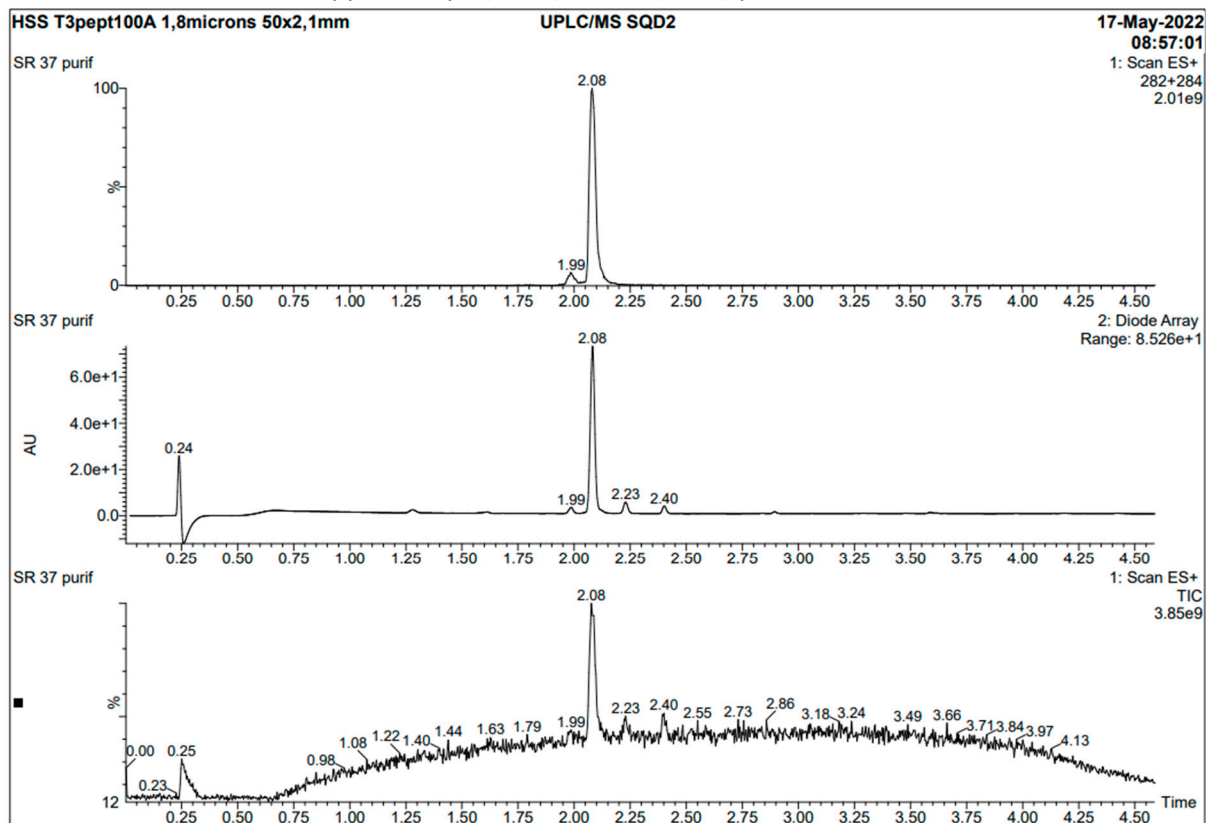



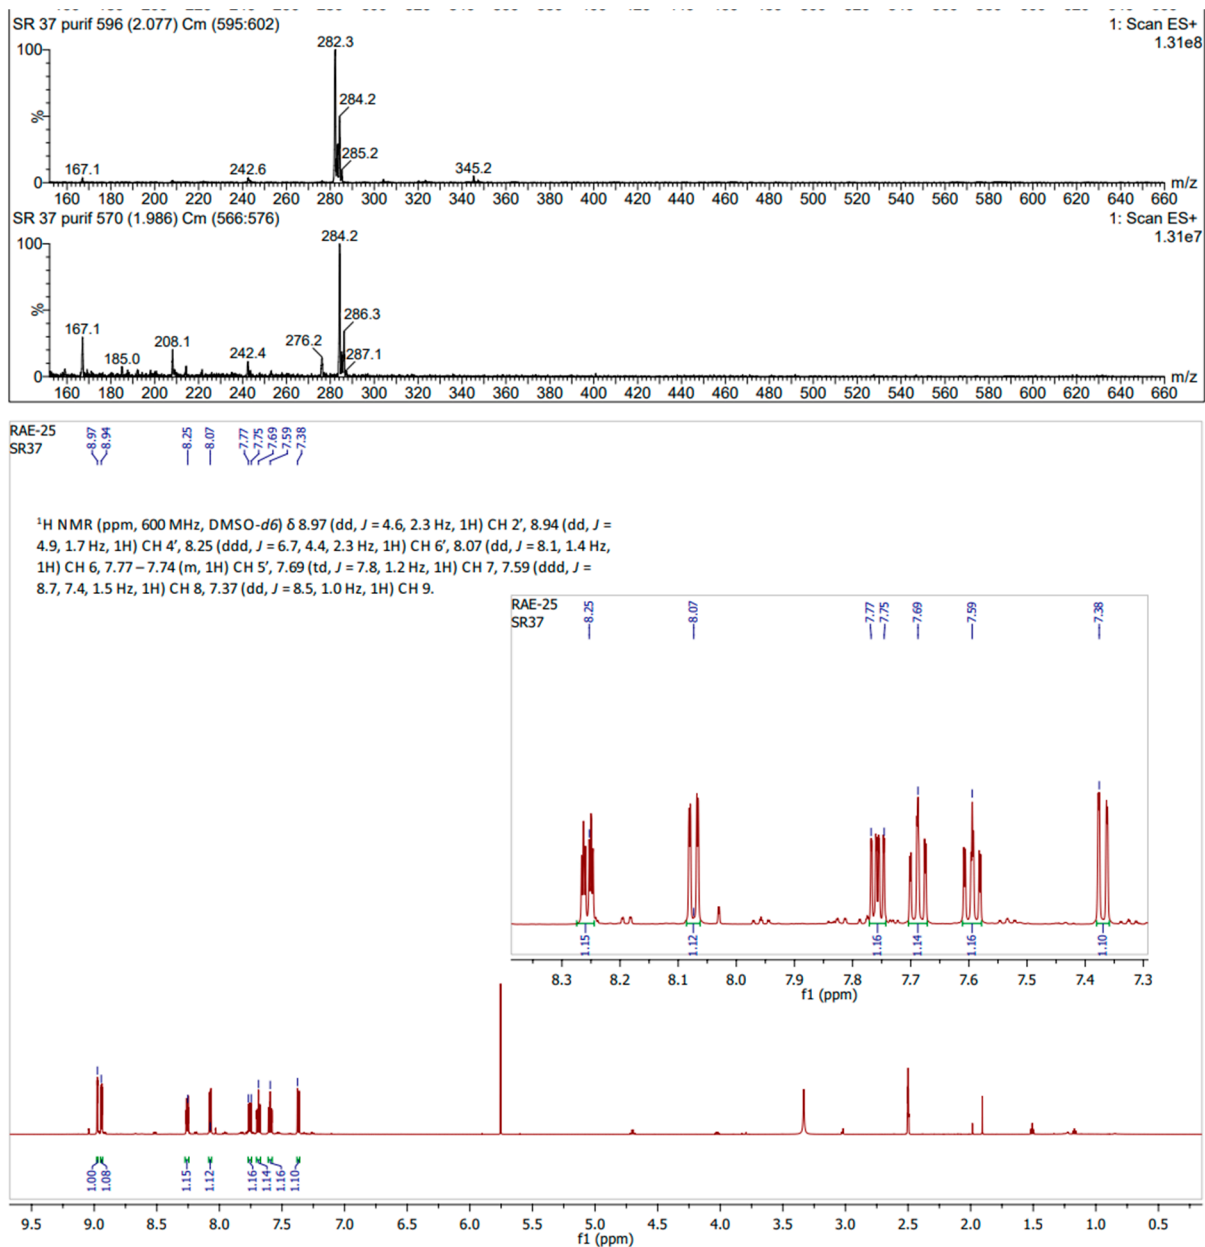

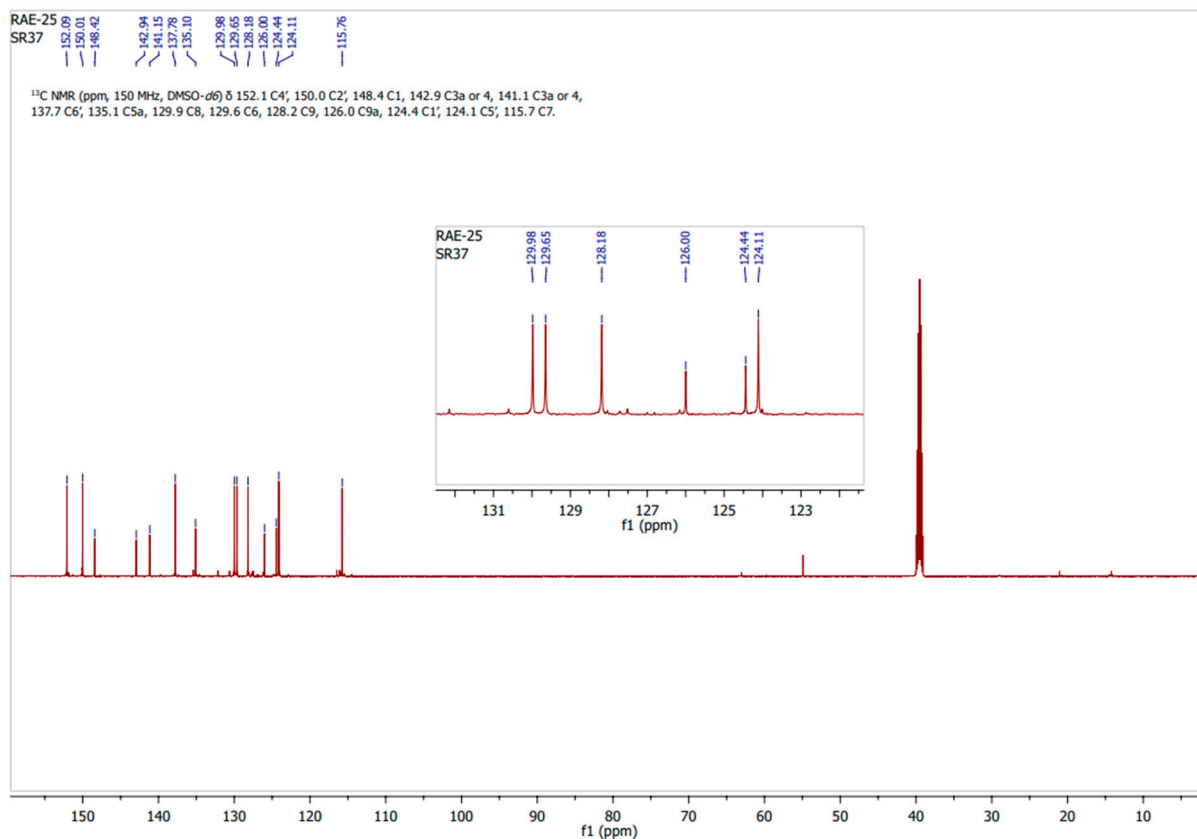

S21. 4-chloro-1-phenethyl-[1,2,4]triazolo[4,3-a]quinoxaline (**15f**).

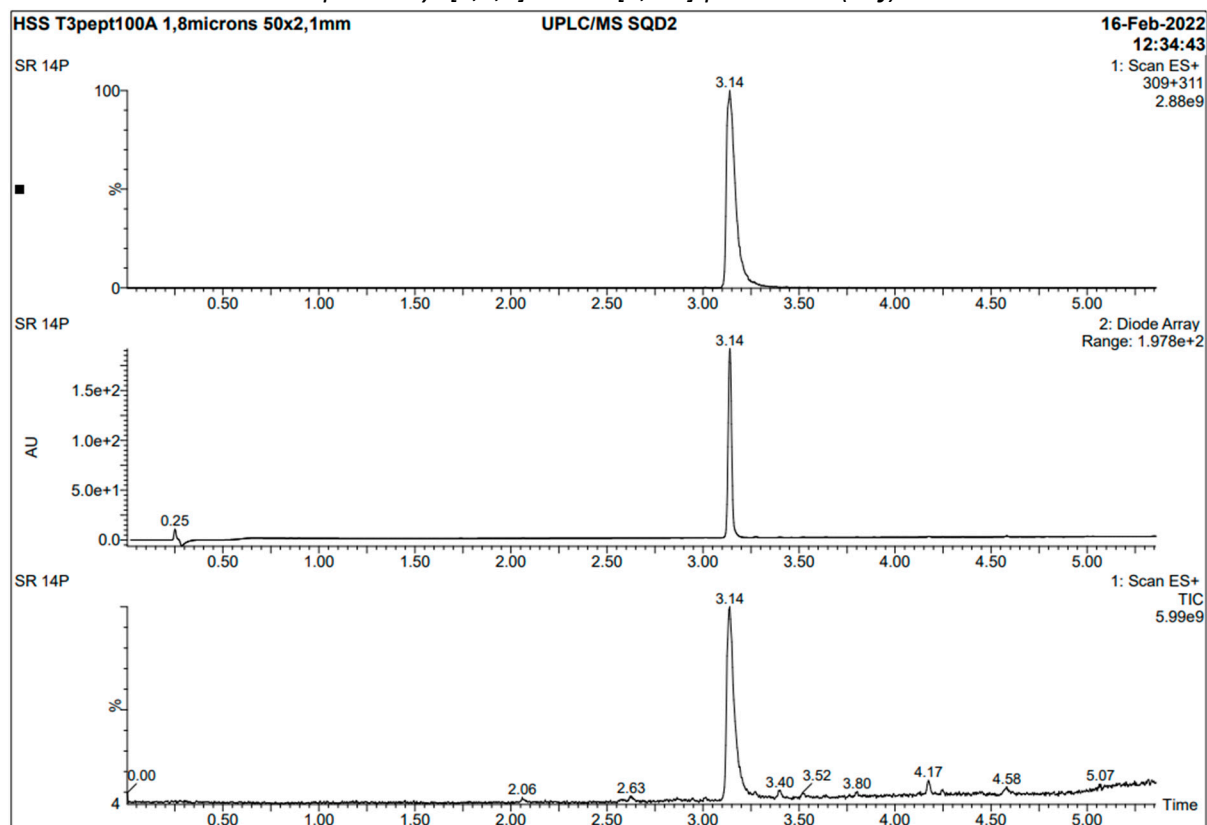

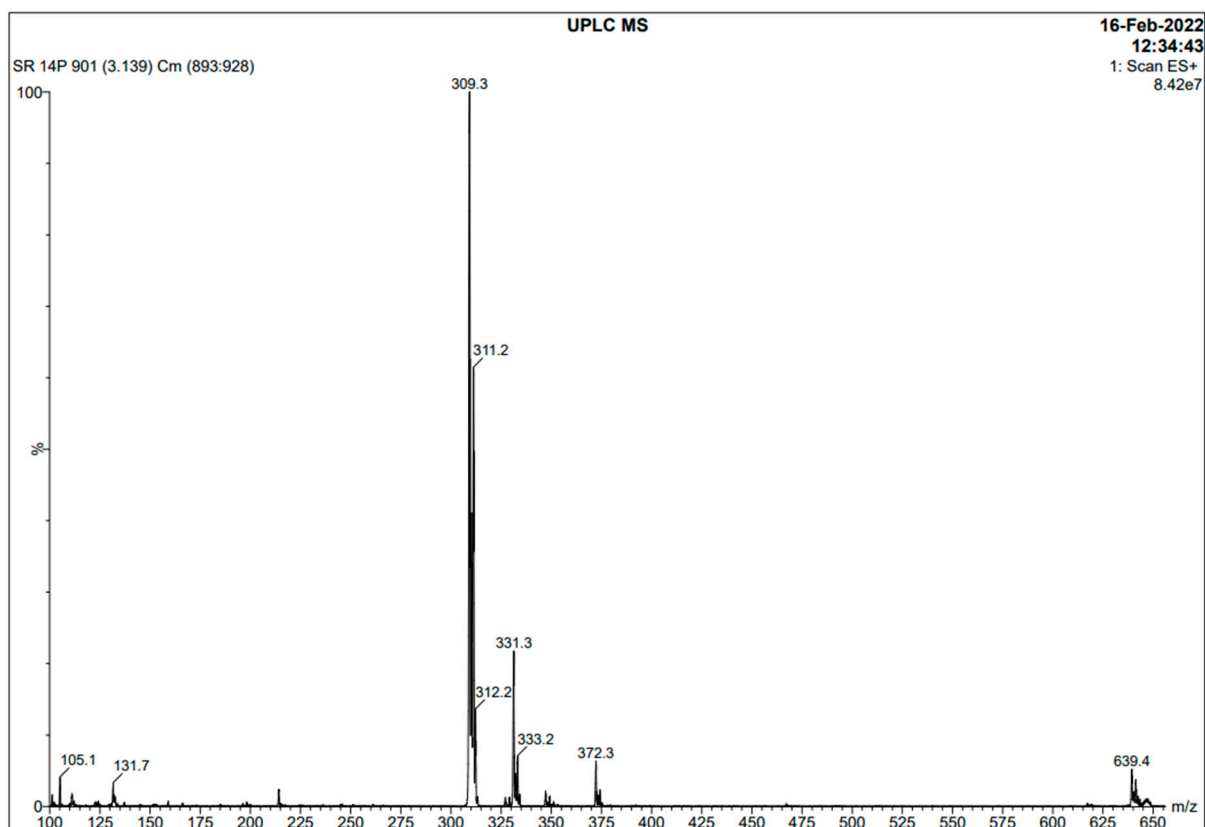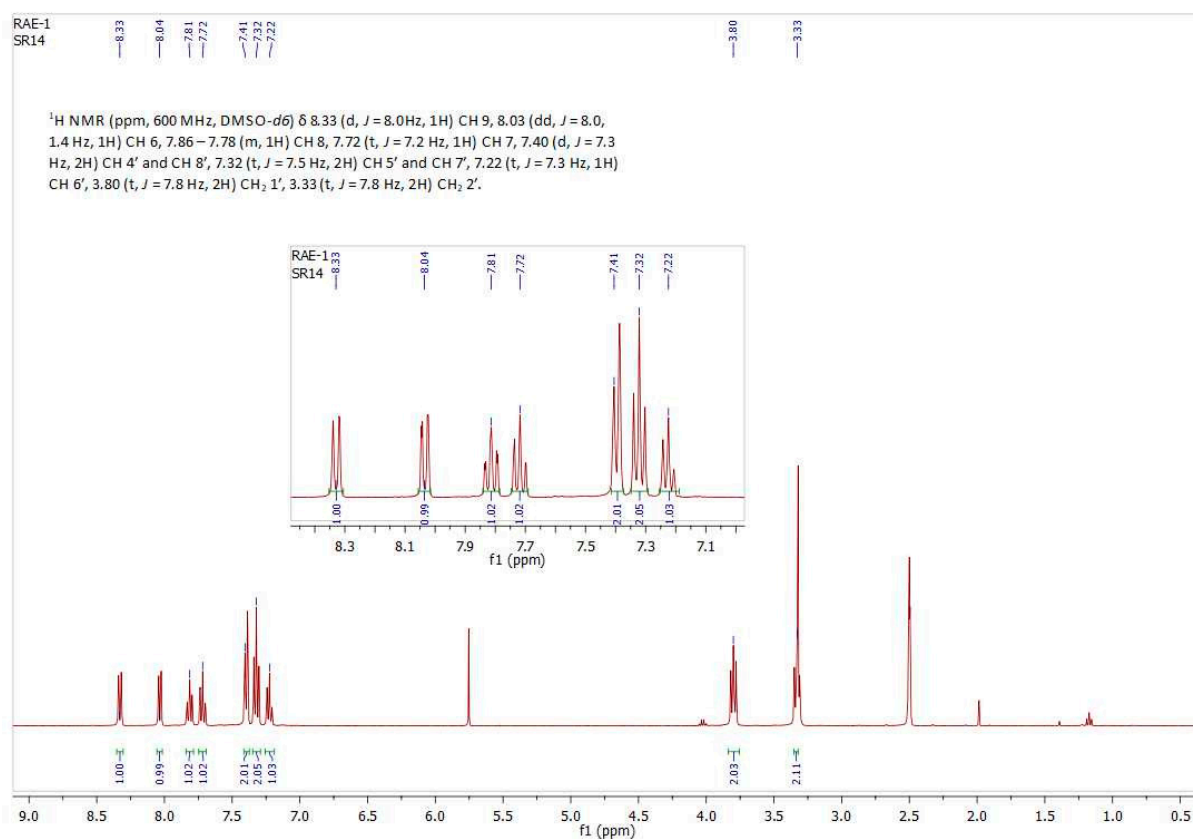

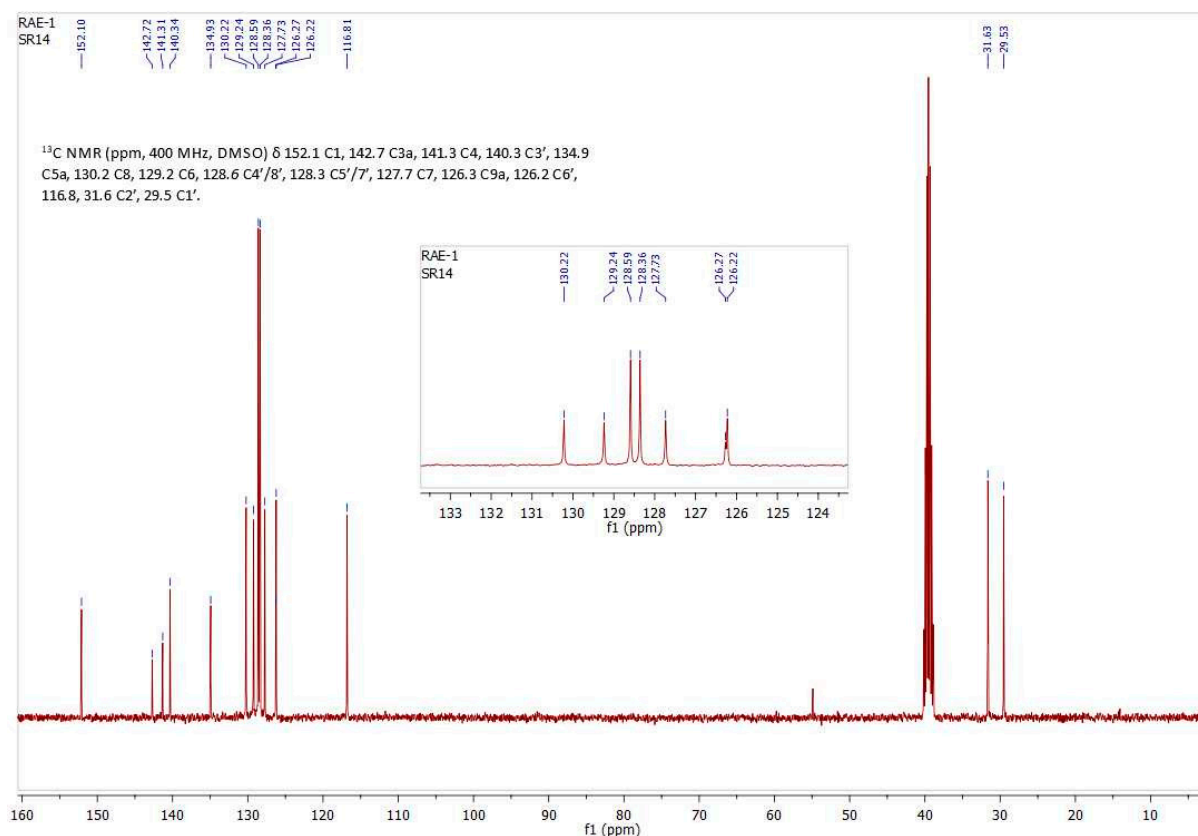

S22. 1-butyl-4-chloro-[1,2,4]triazolo[4,3-a]quinoxaline (15g).

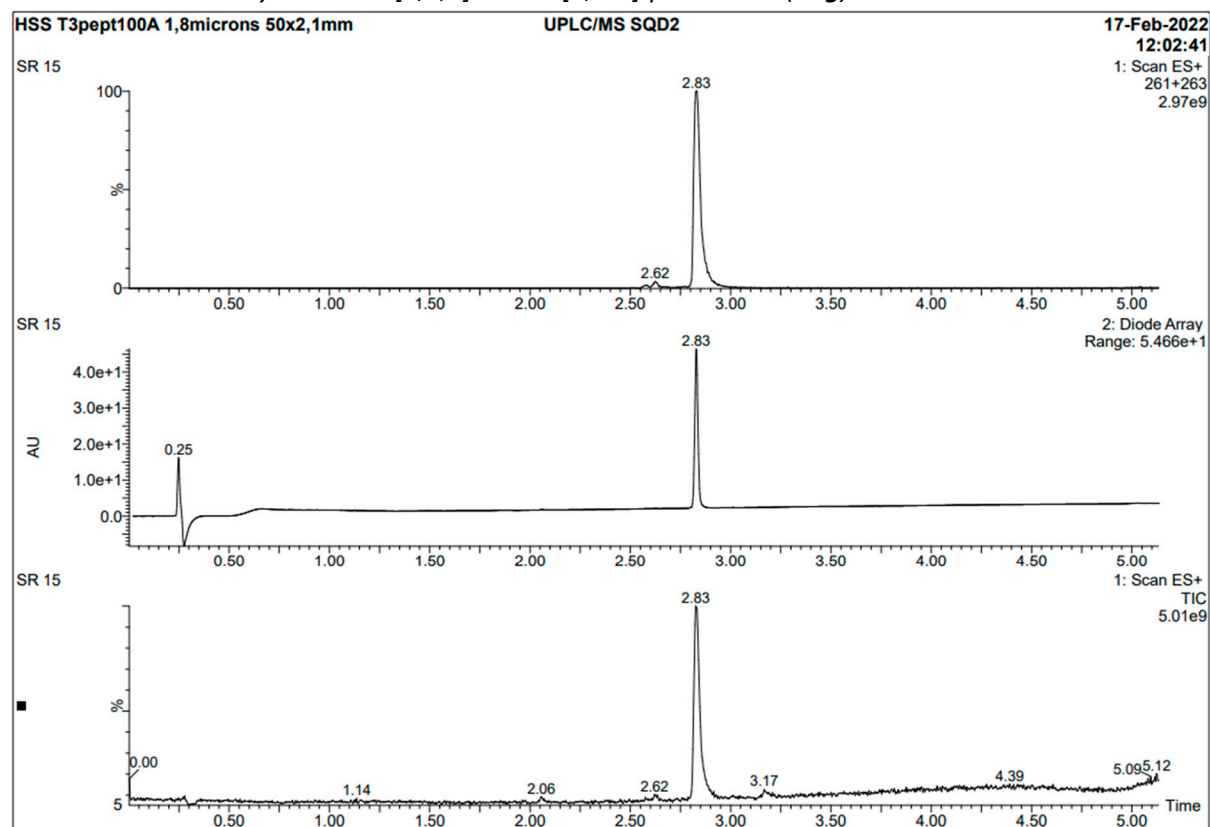

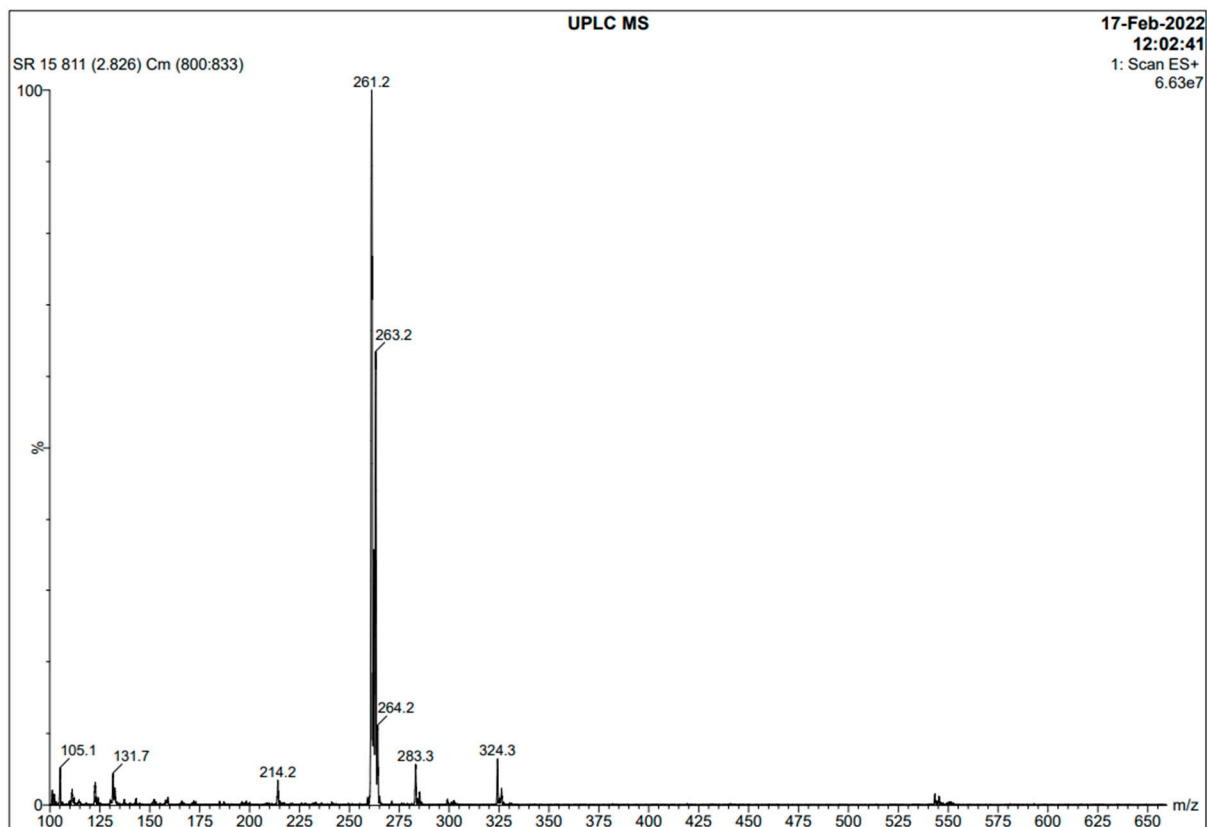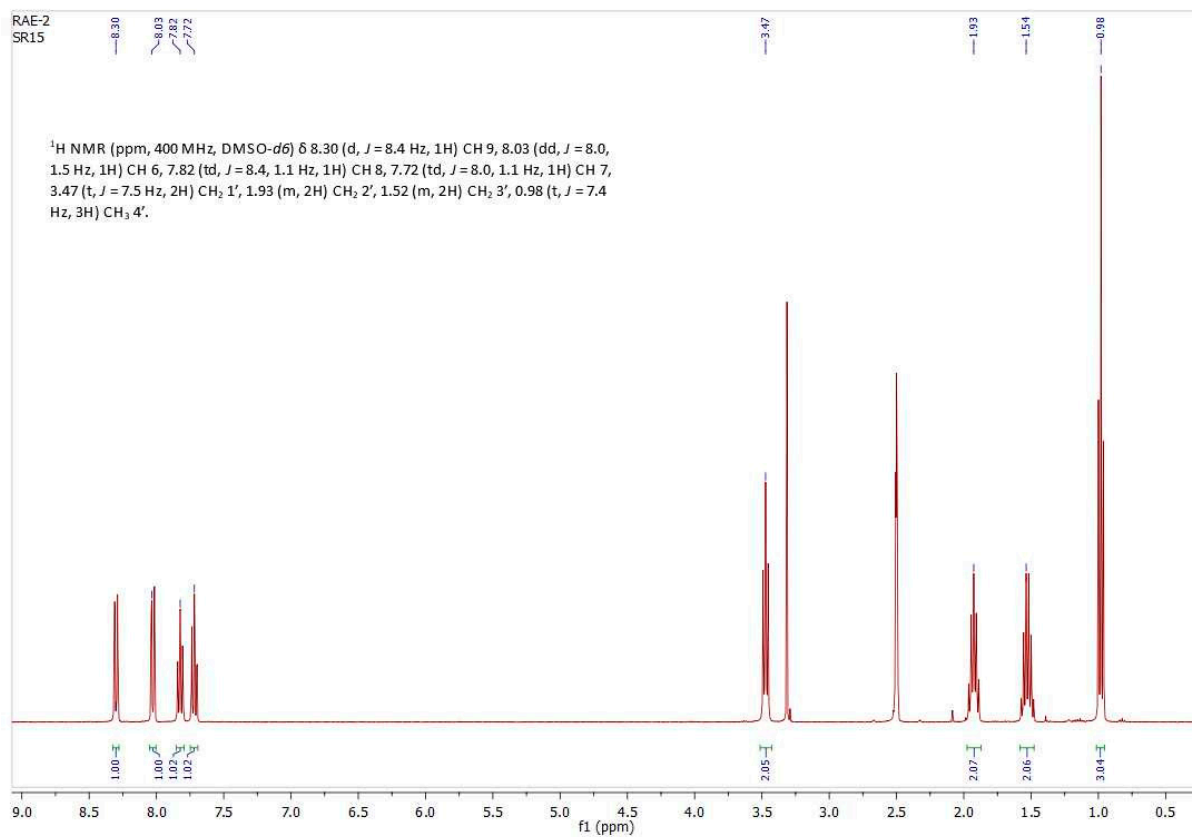

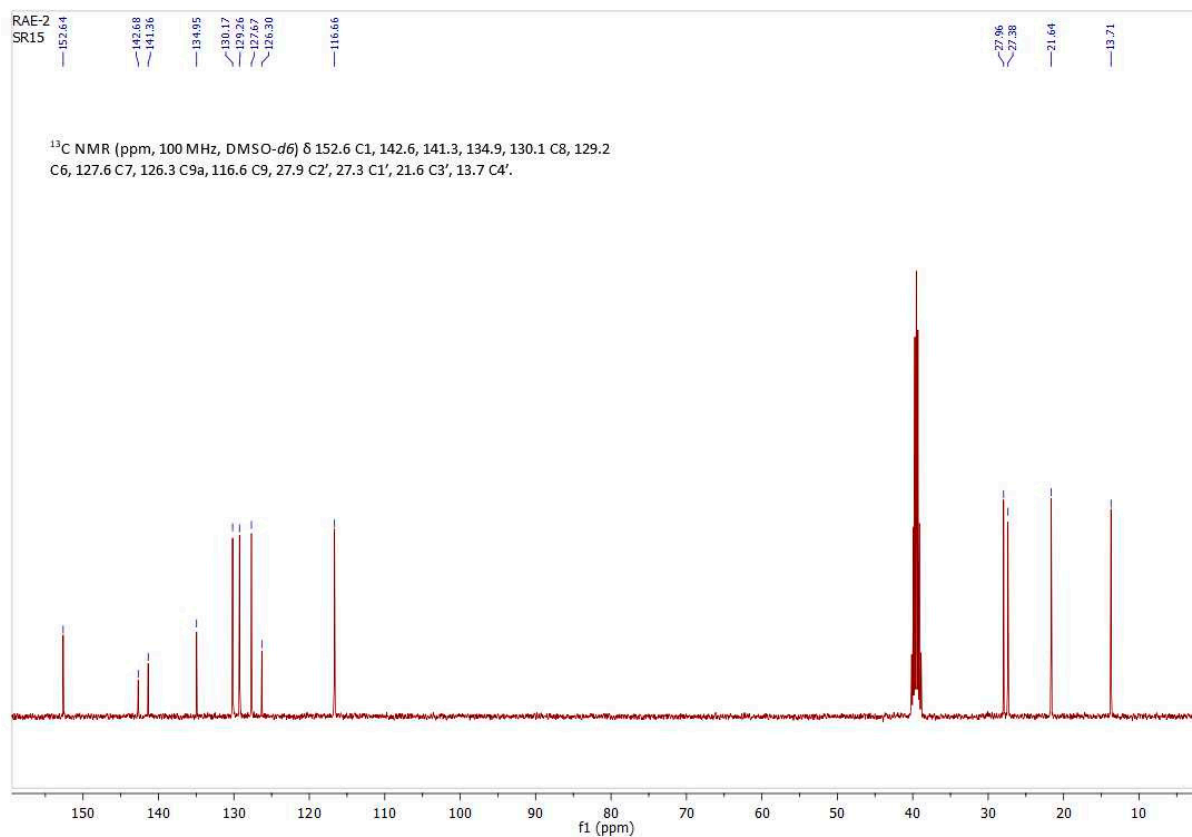

S23. 4-chloro-1-isobutyl-[1,2,4]triazolo[4,3-*a*]quinoxaline (**15h**).

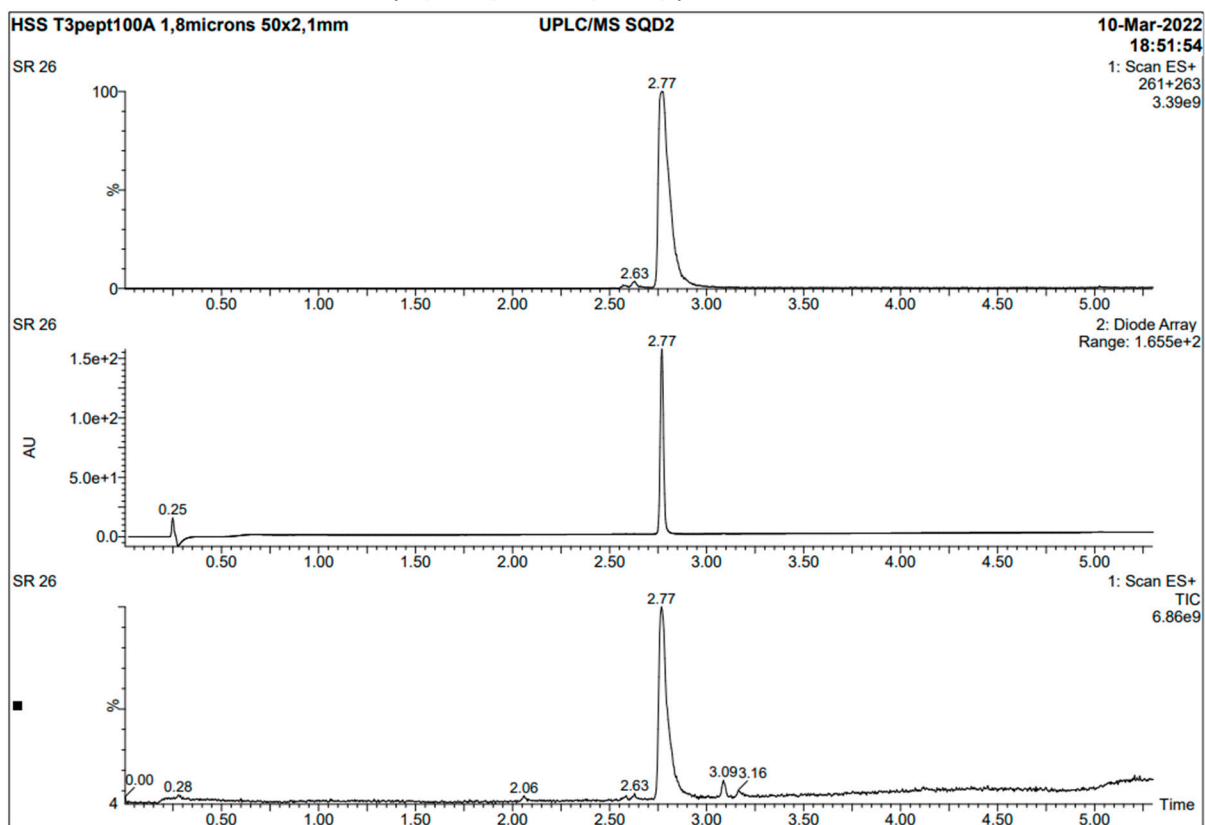

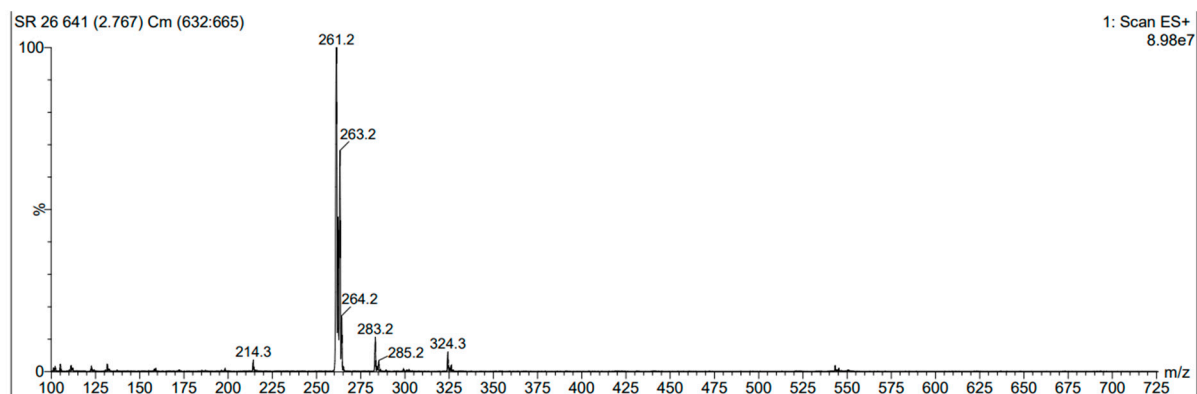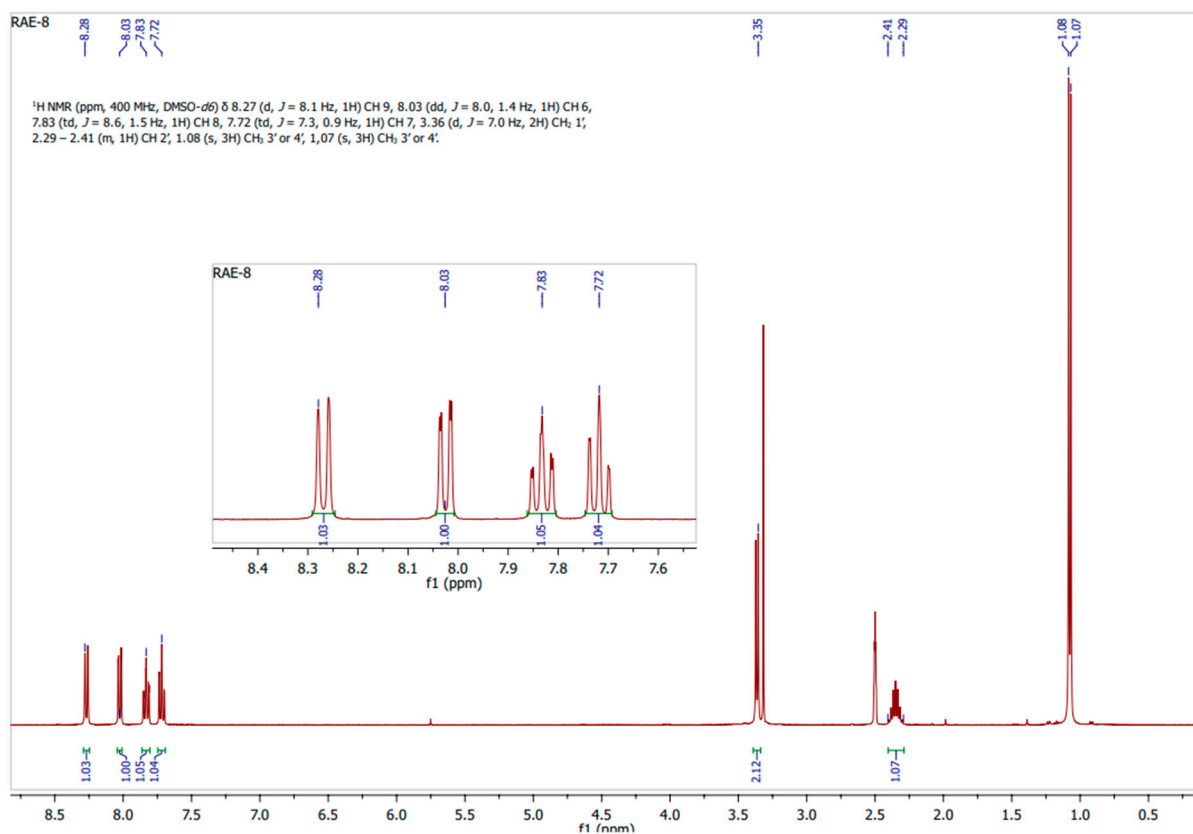

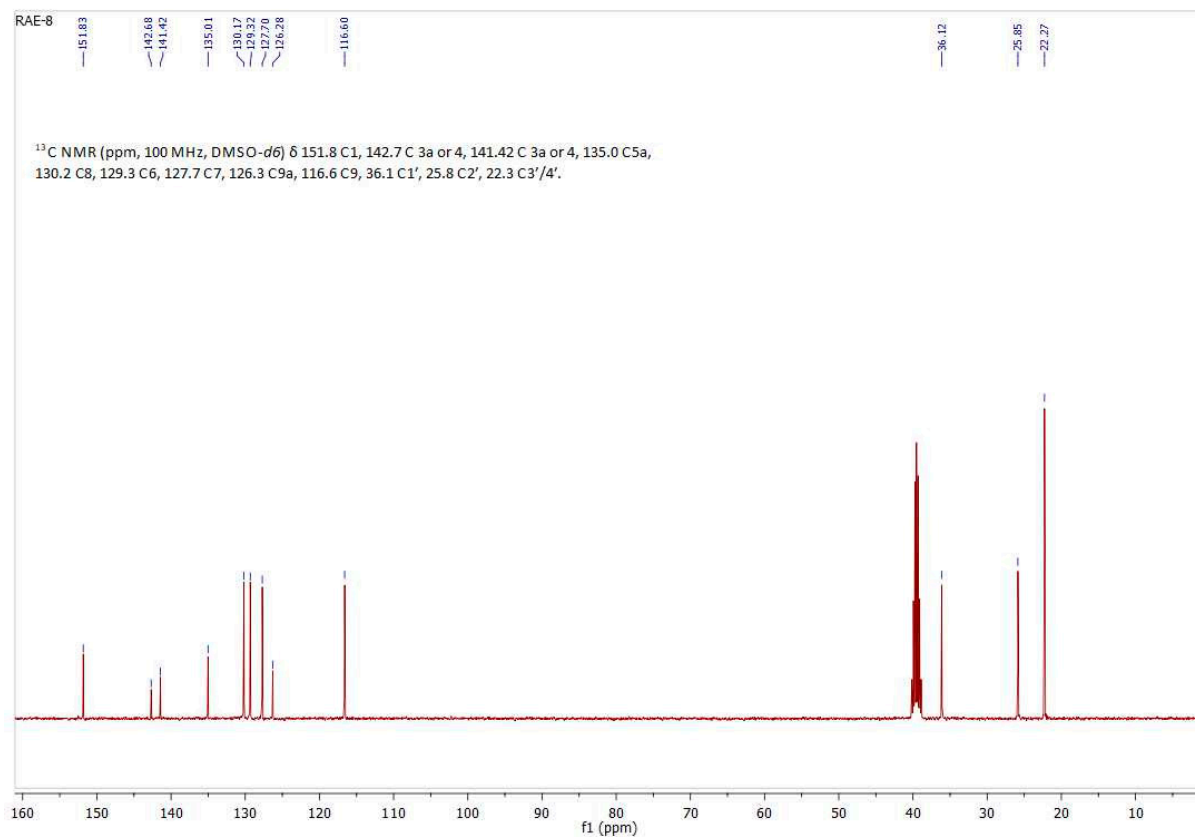

S24. 4-chloro-1-methyl-[1,2,4]triazolo[4,3-a]quinoxaline (**15i**).

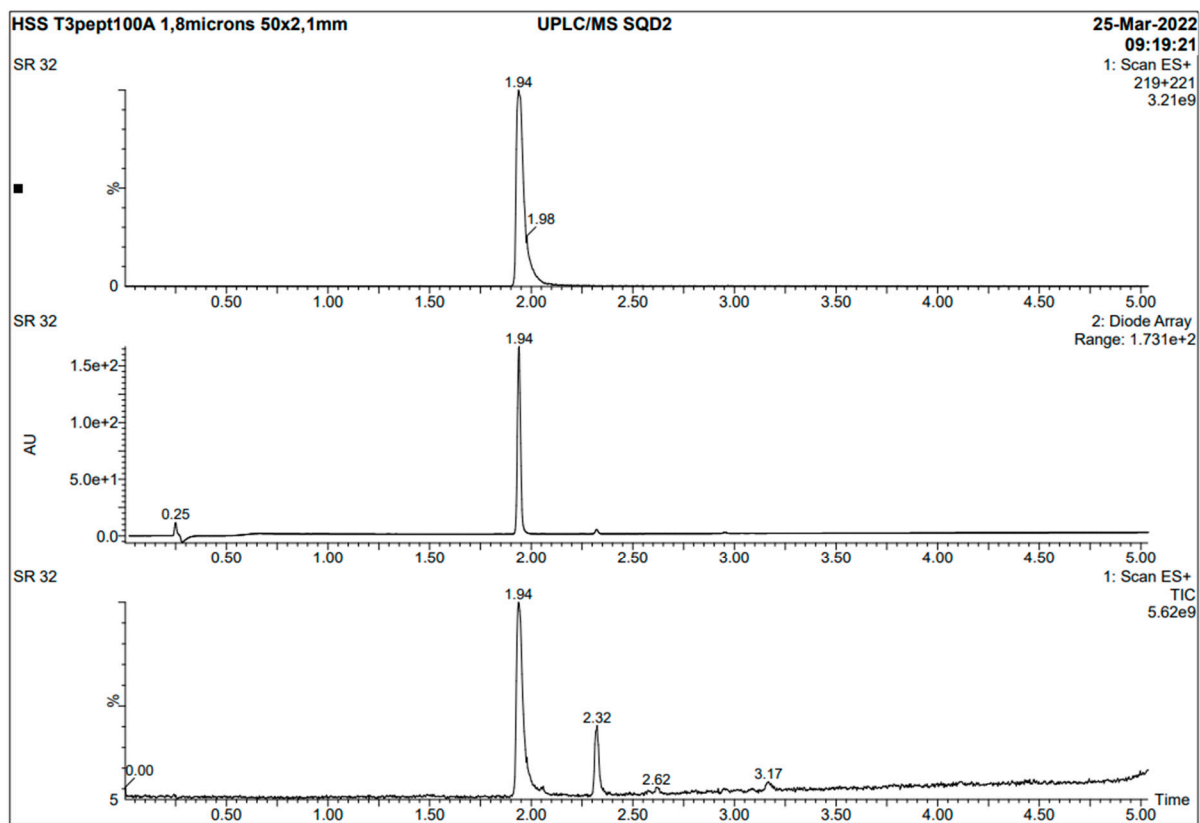



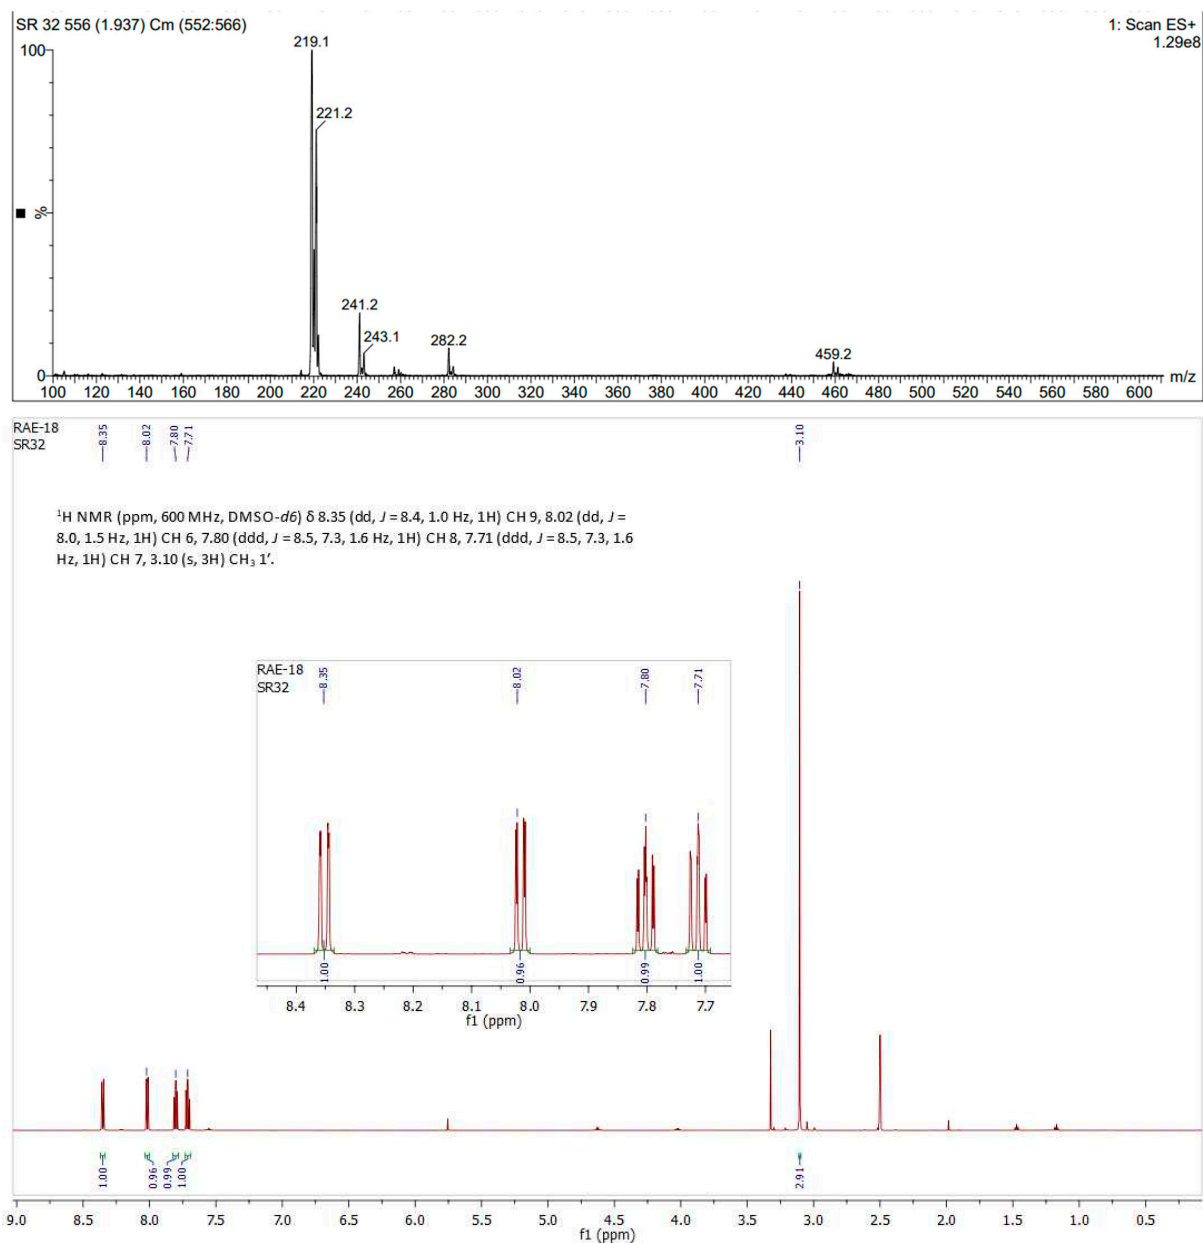

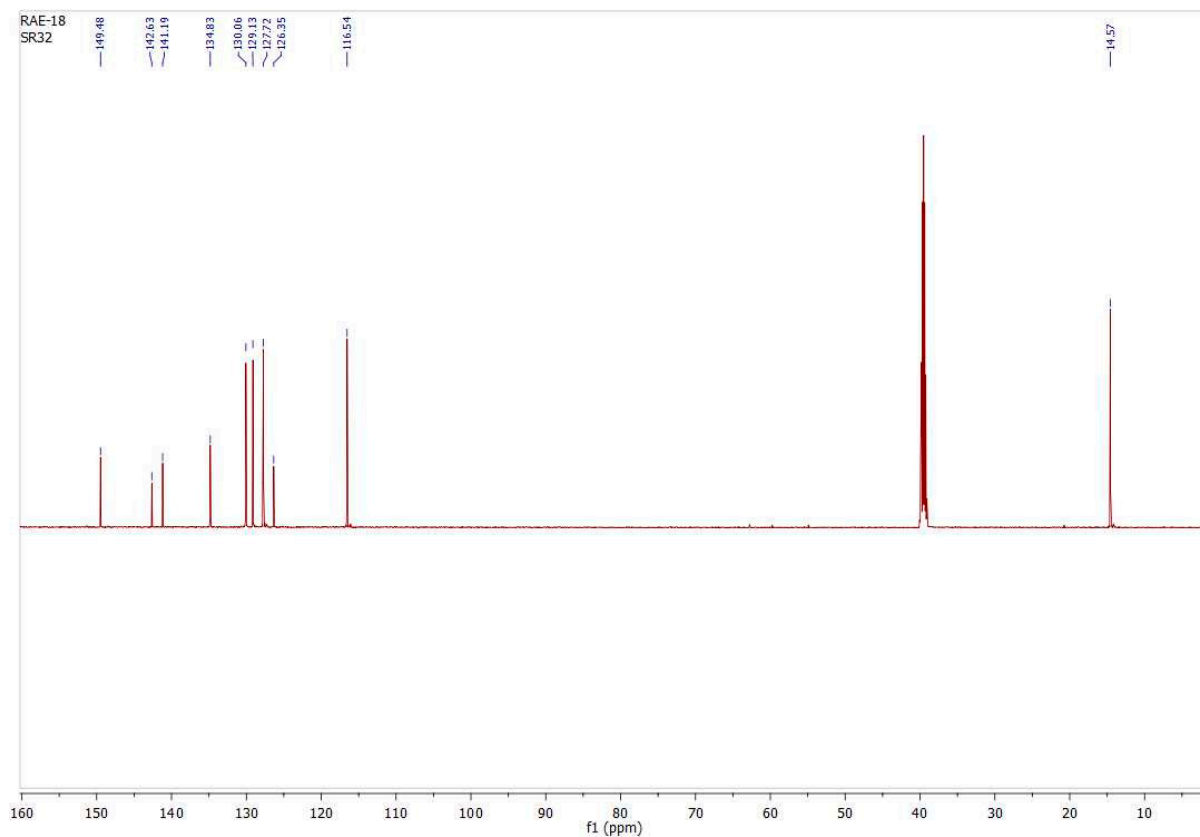

S25. 1-(3,4-dimethoxyphenyl)-N-methyl-[1,2,4]triazolo[4,3-a]quinoxalin-4-amine (**16a**).

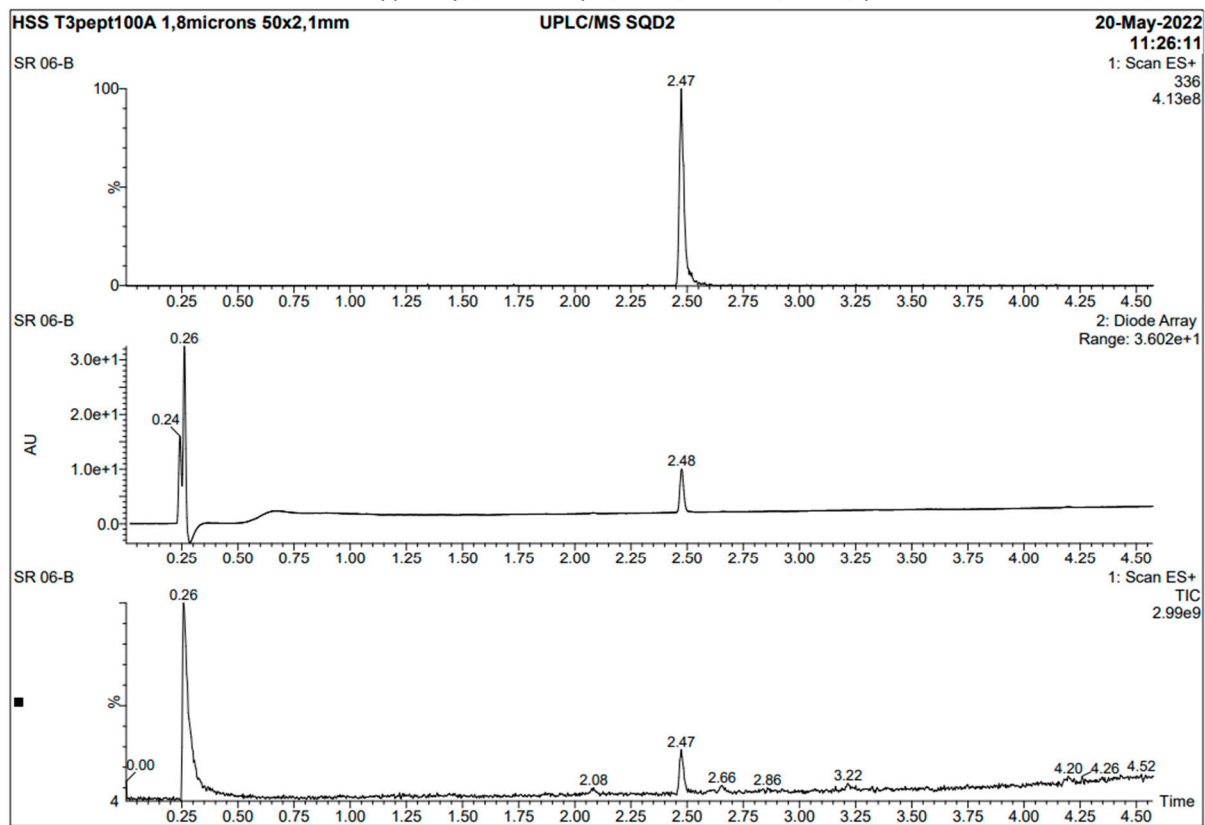

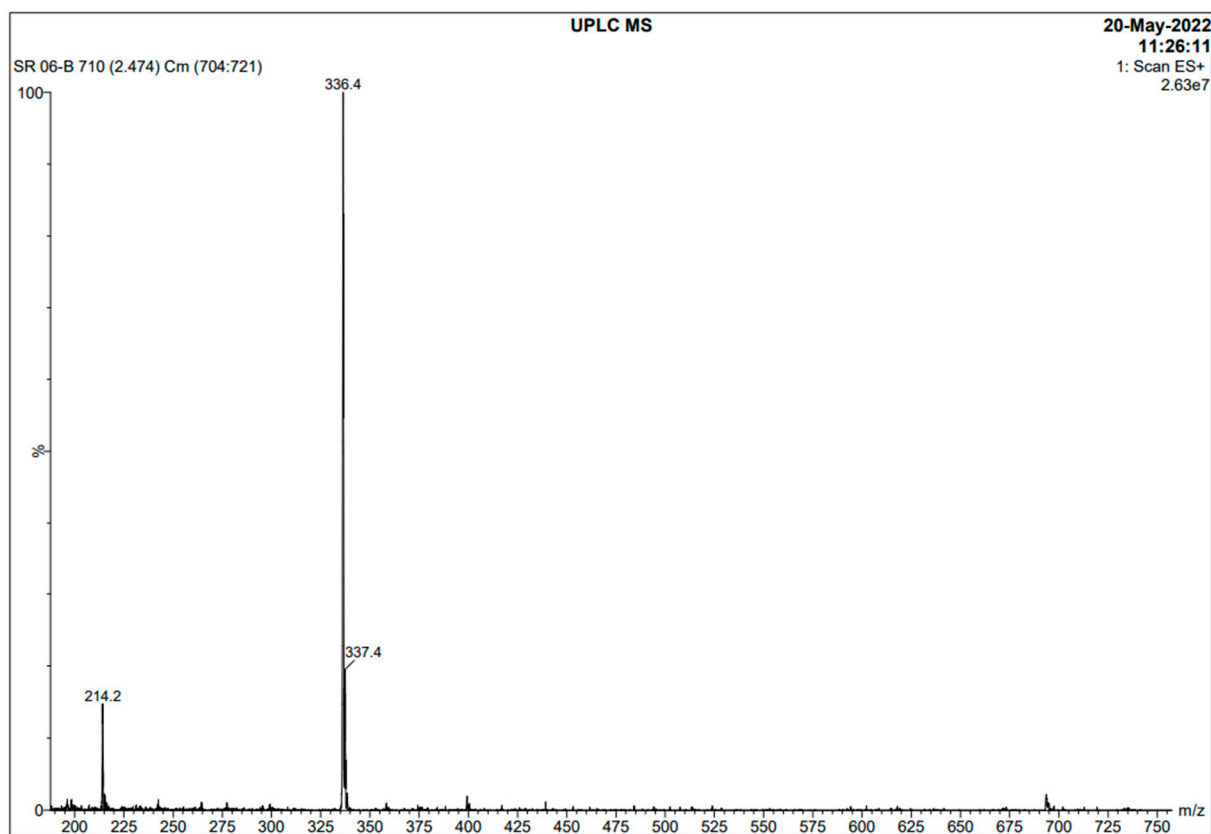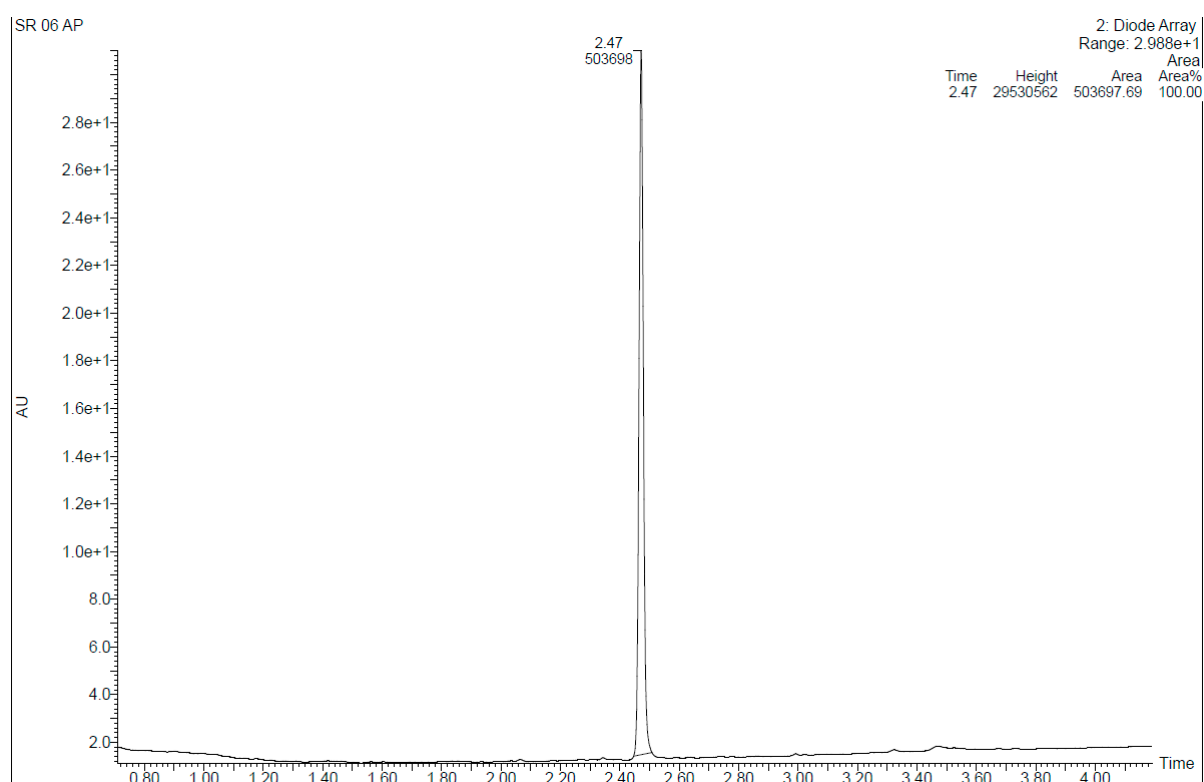



## Acquisition Parameter

Source Type ESI Ion Polarity Positive Scan Begin 50 m/z Scan End 2200 m/z

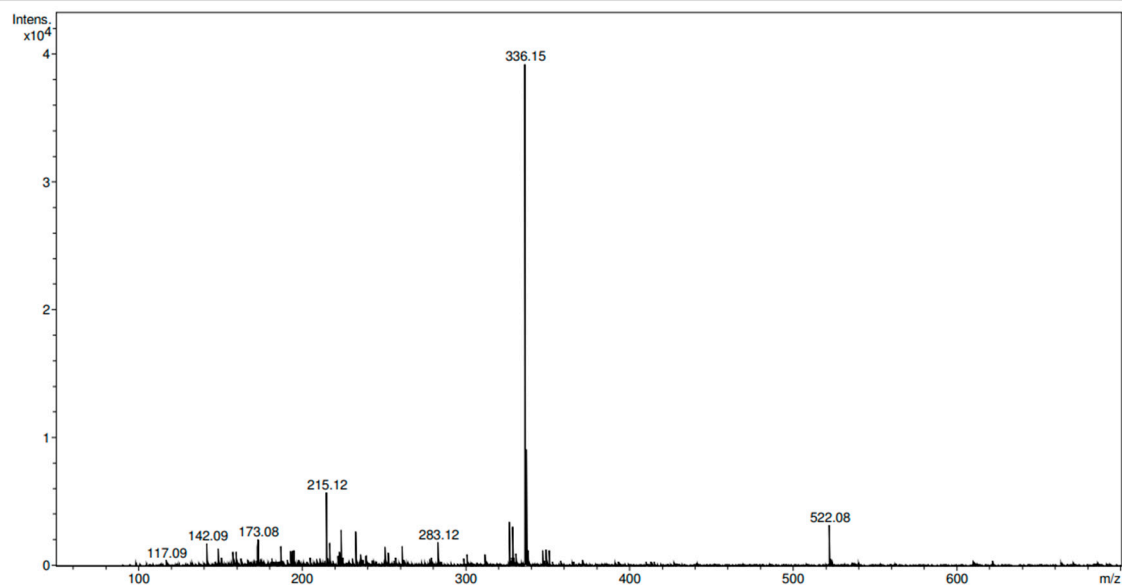

## Acquisition Parameter

Source Type ESI Ion Polarity Positive Scan Begin 50 m/z Scan End 2200 m/z

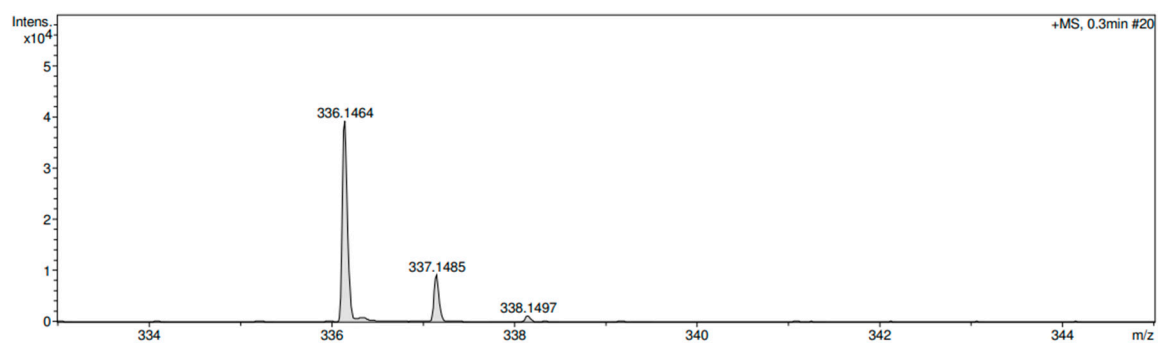

| Meas. m/z | # | Ion Formula | m/z      | err [ppm] | mSigma | # Sigma | Score  | rdb  | e <sup>-</sup> | Conf | N-Rule |
|-----------|---|-------------|----------|-----------|--------|---------|--------|------|----------------|------|--------|
| 336.1464  | 1 | C18H18N5O2  | 336.1455 | -2.6      | 9.8    | 1       | 100.00 | 12.5 | even           |      | ok     |

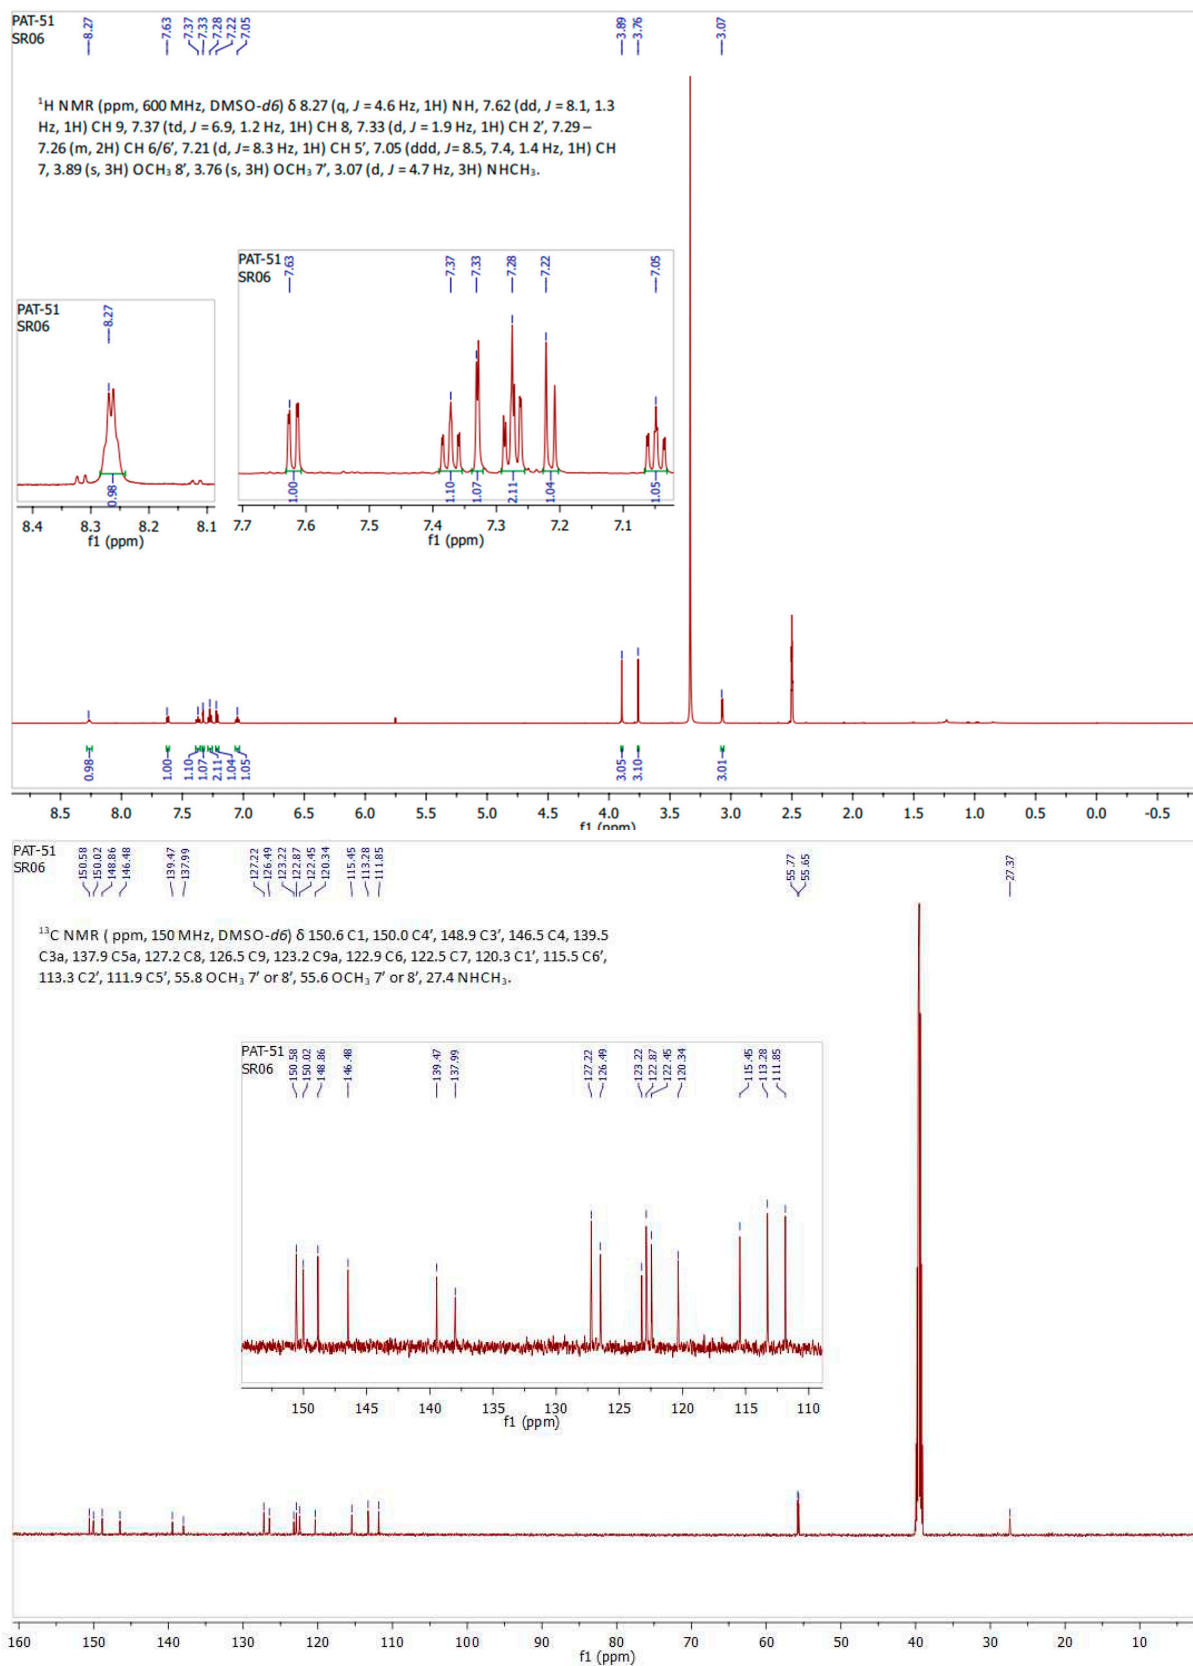

S26. 1-(3-methoxyphenyl)-N-methyl-[1,2,4]triazolo[4,3-a]quinoxalin-4-amine (**16b**).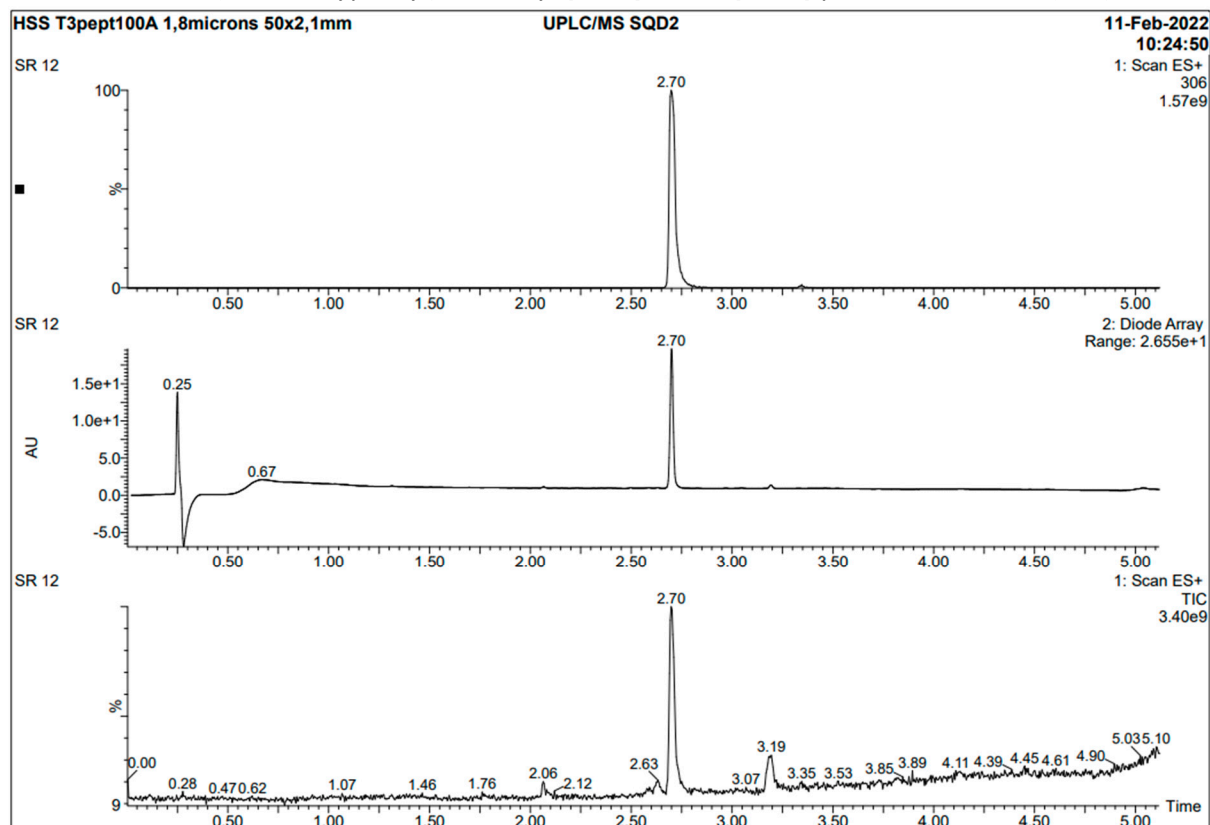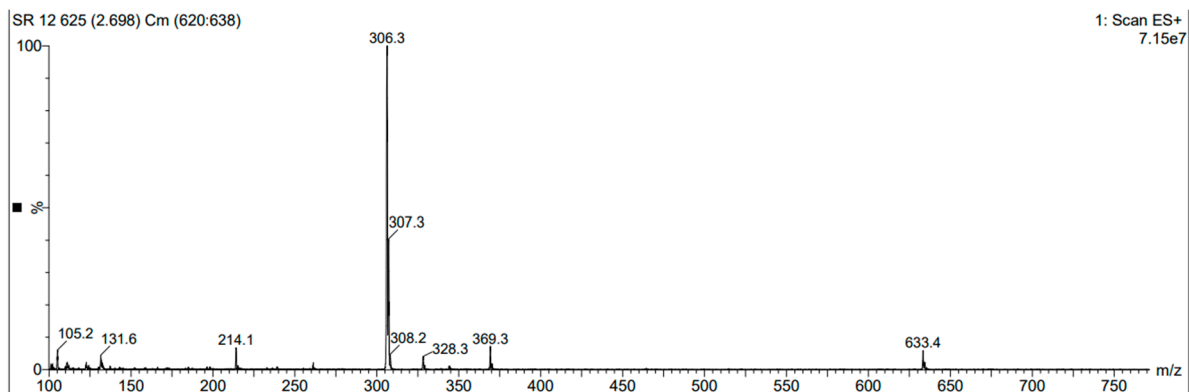

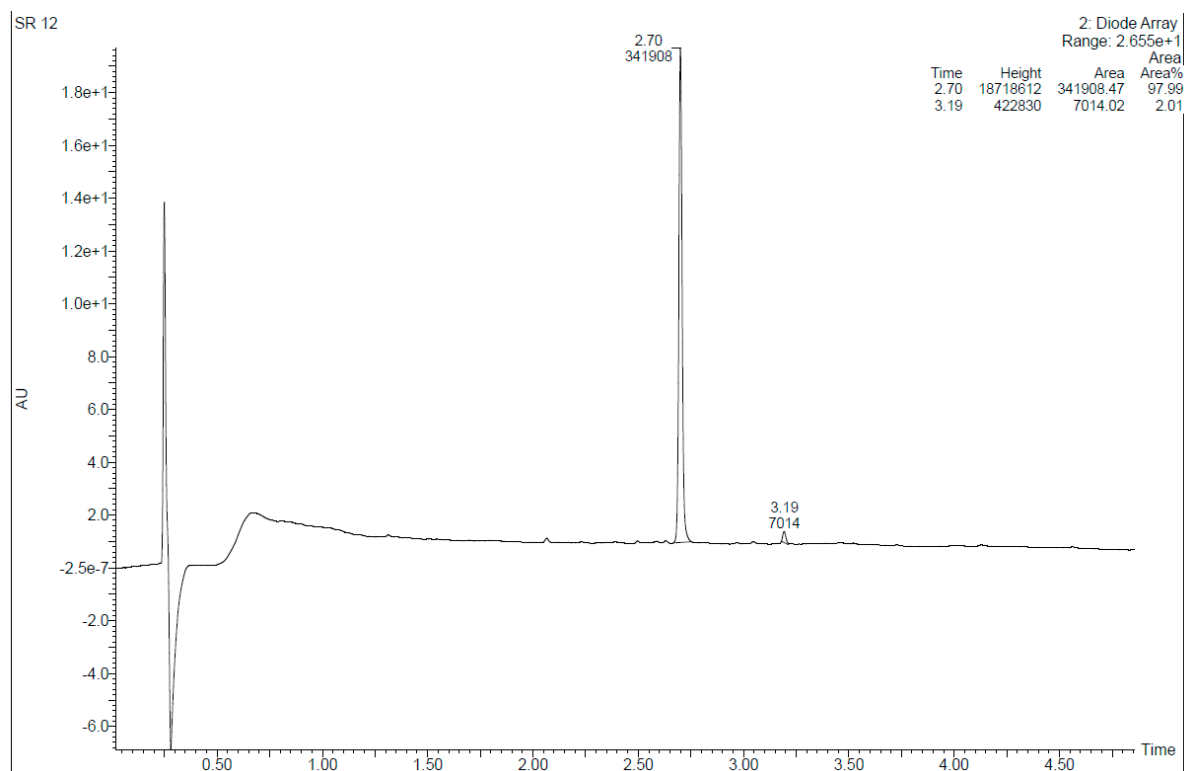

#### Acquisition Parameter

Source Type ESI Ion Polarity Positive Scan Begin 50 m/z Scan End 2200 m/z

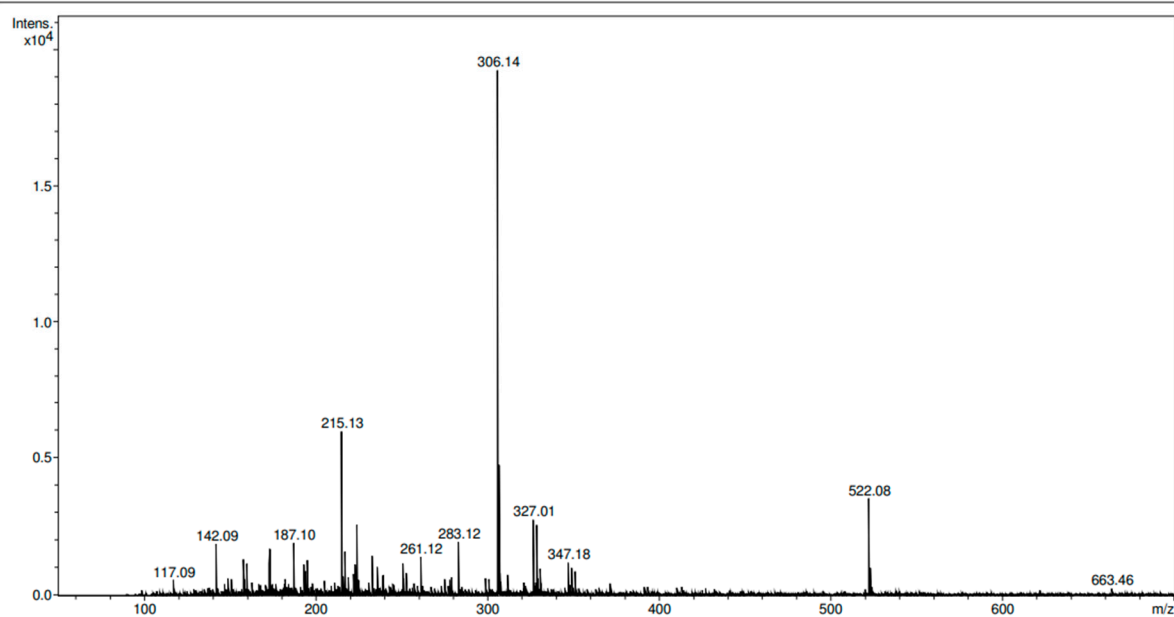



## Acquisition Parameter

Source Type ESI Ion Polarity Positive Scan Begin 50 m/z Scan End 2200 m/z

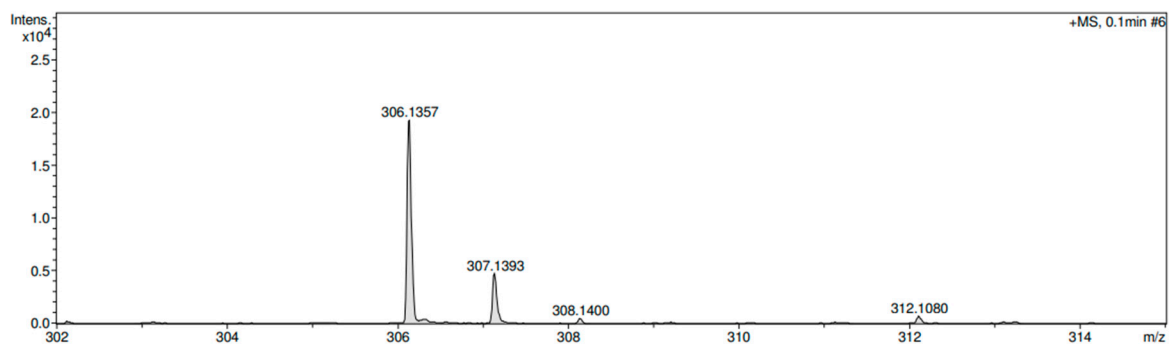

| Meas. m/z | # | Ion Formula | m/z      | err [ppm] | mSigma | # Sigma | Score  | rdb  | e <sup>-</sup> Conf | N-Rule |
|-----------|---|-------------|----------|-----------|--------|---------|--------|------|---------------------|--------|
| 306.1357  | 1 | C17H16NSO   | 306.1349 | -2.4      | 24.3   | 1       | 100.00 | 12.5 | even                | ok     |
|           | 2 | C16H20NO5   | 306.1336 | -6.7      | 37.7   | 2       | 30.36  | 7.5  | even                | ok     |

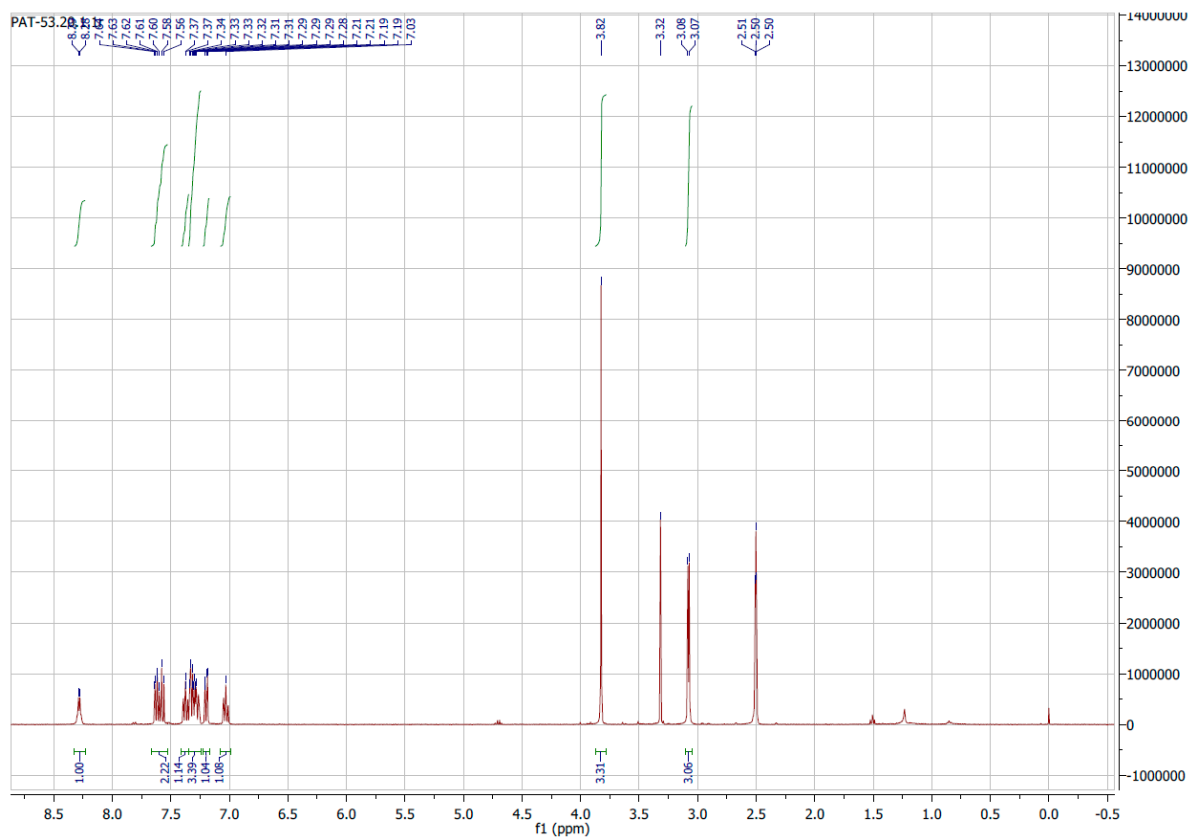



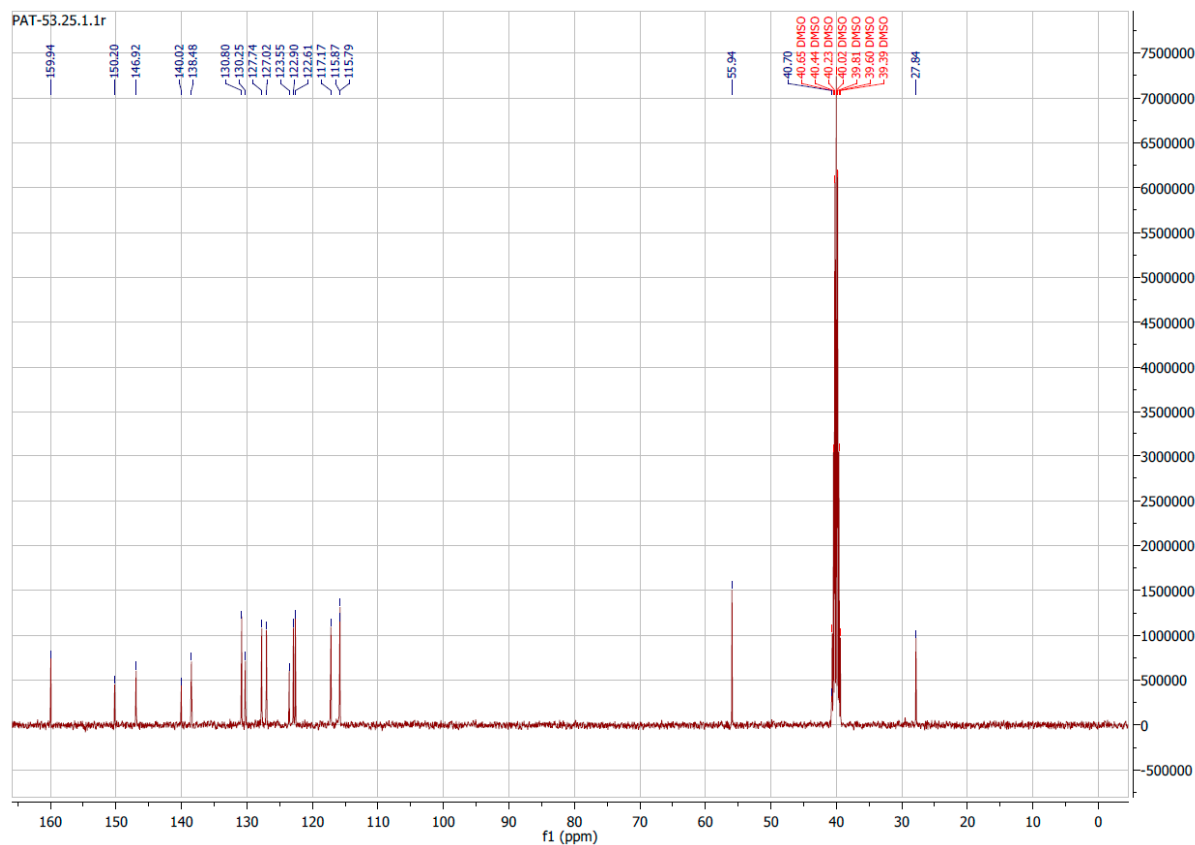

S27. *N*-methyl-1-phenyl-[1,2,4]triazolo[4,3-*a*]quinoxalin-4-amine (**16c**).

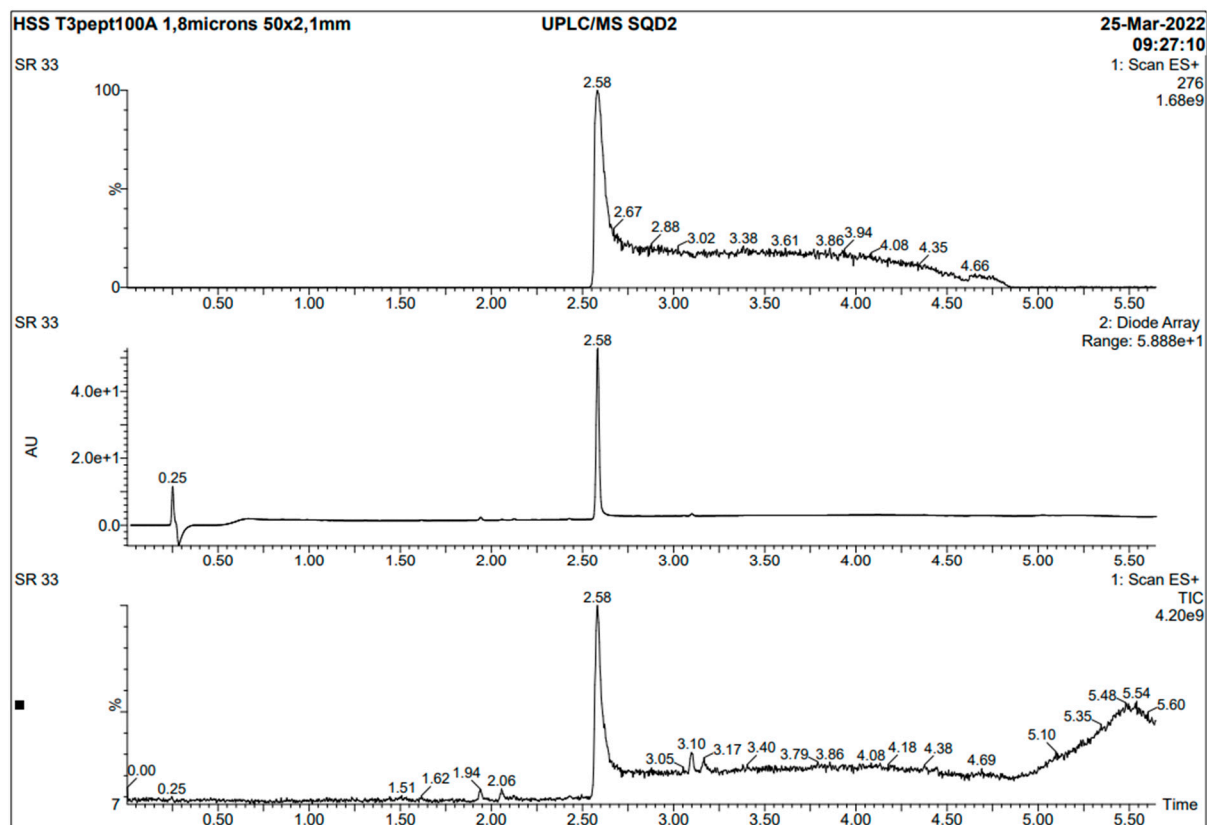

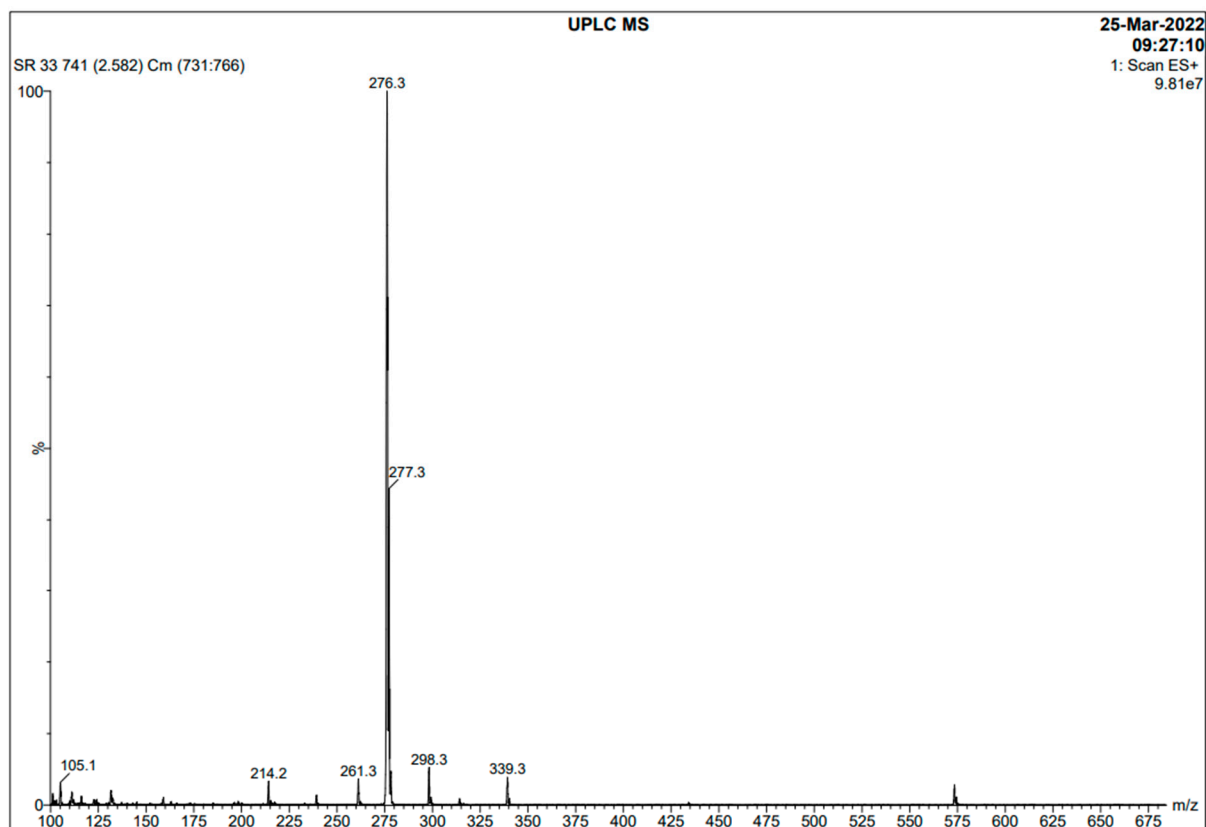

Acquisition Parameter

Source Type ESI Ion Polarity Positive Scan Begin 50 m/z Scan End 2200 m/z

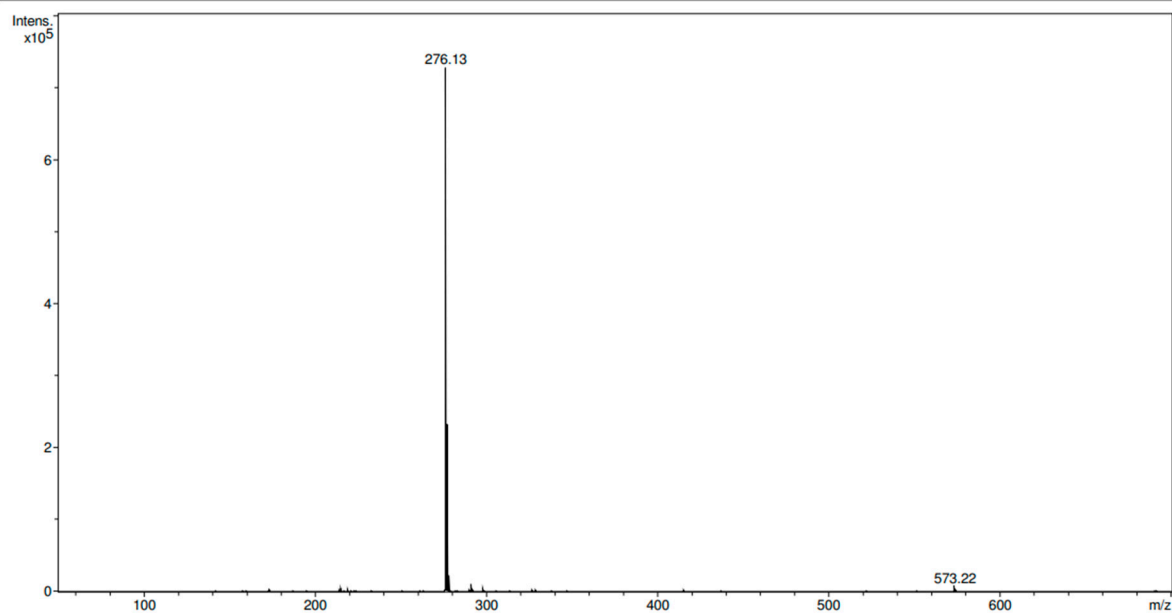



## Acquisition Parameter

Source Type ESI Ion Polarity Positive Scan Begin 50 m/z Scan End 2200 m/z

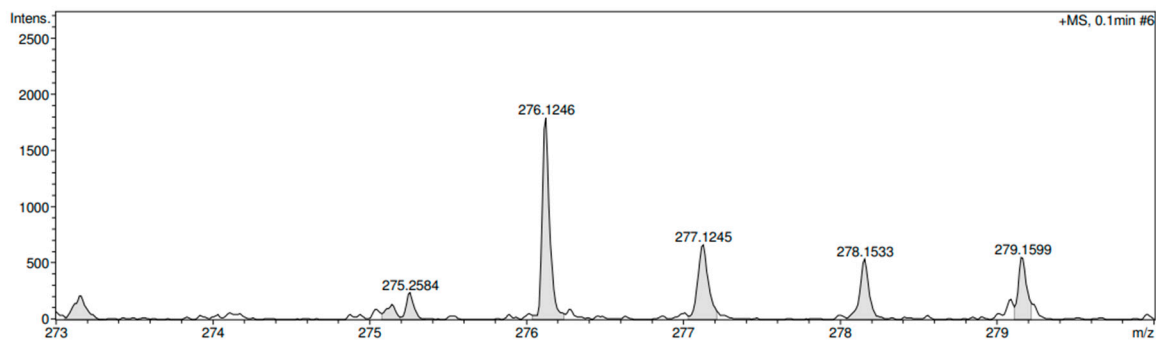

| Meas. m/z | # | Ion Formula | m/z      | err [ppm] | mSigma | # Sigma | Score  | rdB  | e <sup>-</sup> Conf | N-Rule |
|-----------|---|-------------|----------|-----------|--------|---------|--------|------|---------------------|--------|
| 276.1246  | 1 | C16H14N5    | 276.1244 | -0.7      | 193.1  | 1       | 100.00 | 12.5 | even                | ok     |
|           | 2 | C15H18NO4   | 276.1230 | -5.6      | 198.9  | 2       | 29.82  | 7.5  | even                | ok     |

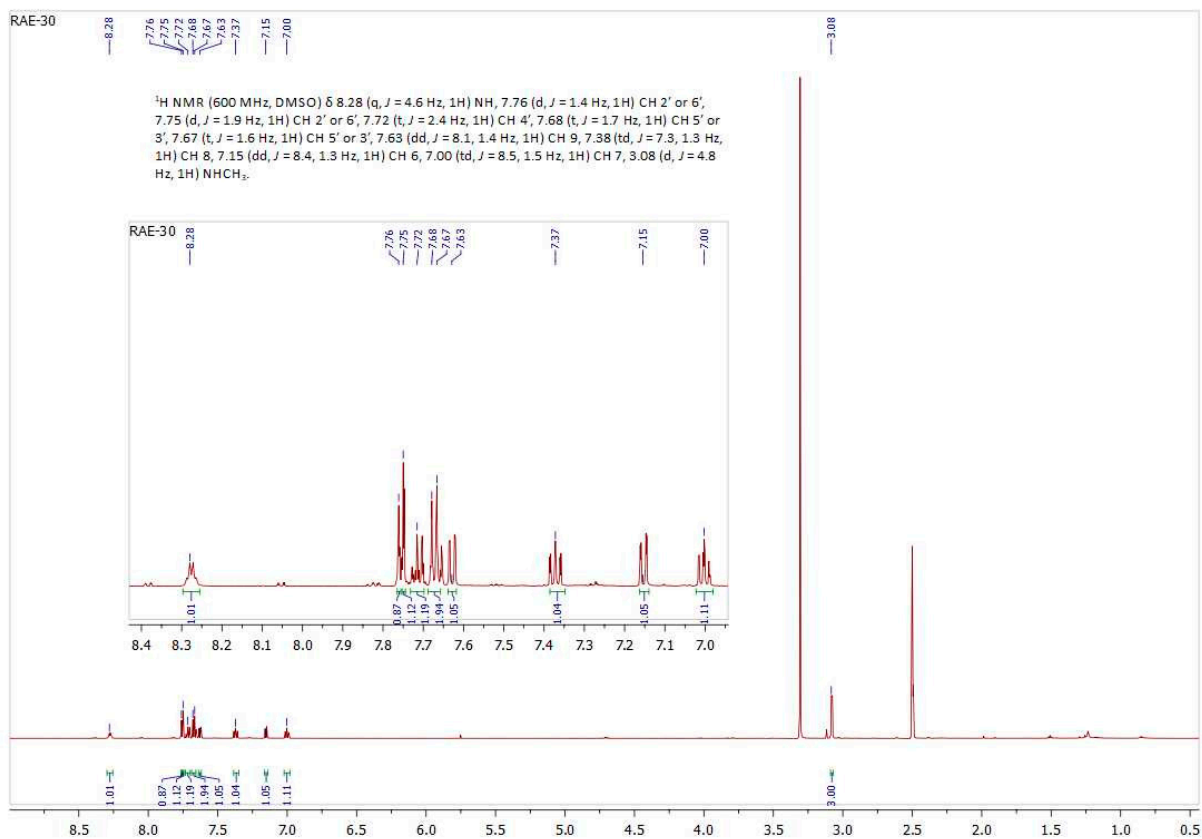

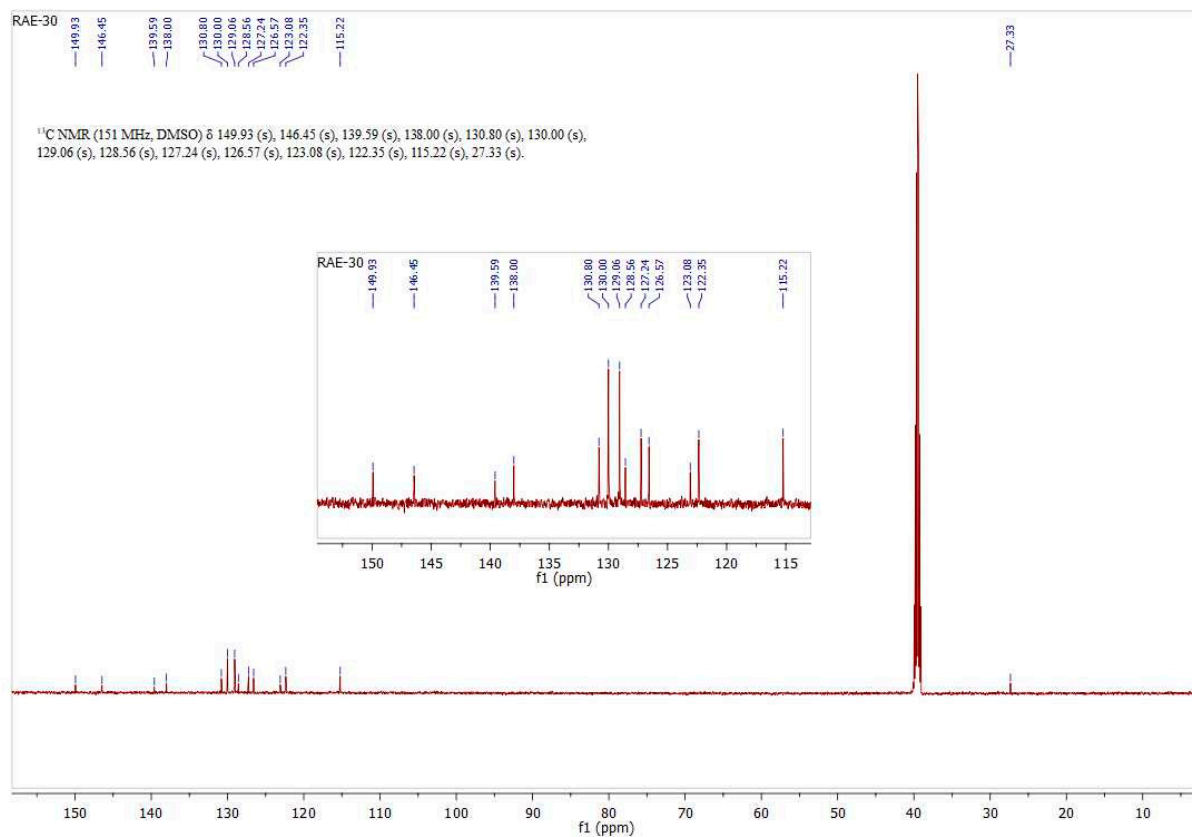

S28. *N*-methyl-1-(3,4,5-trimethoxyphenyl)-[1,2,4]triazolo[4,3-*a*]quinoxalin-4-amine (**16d**).

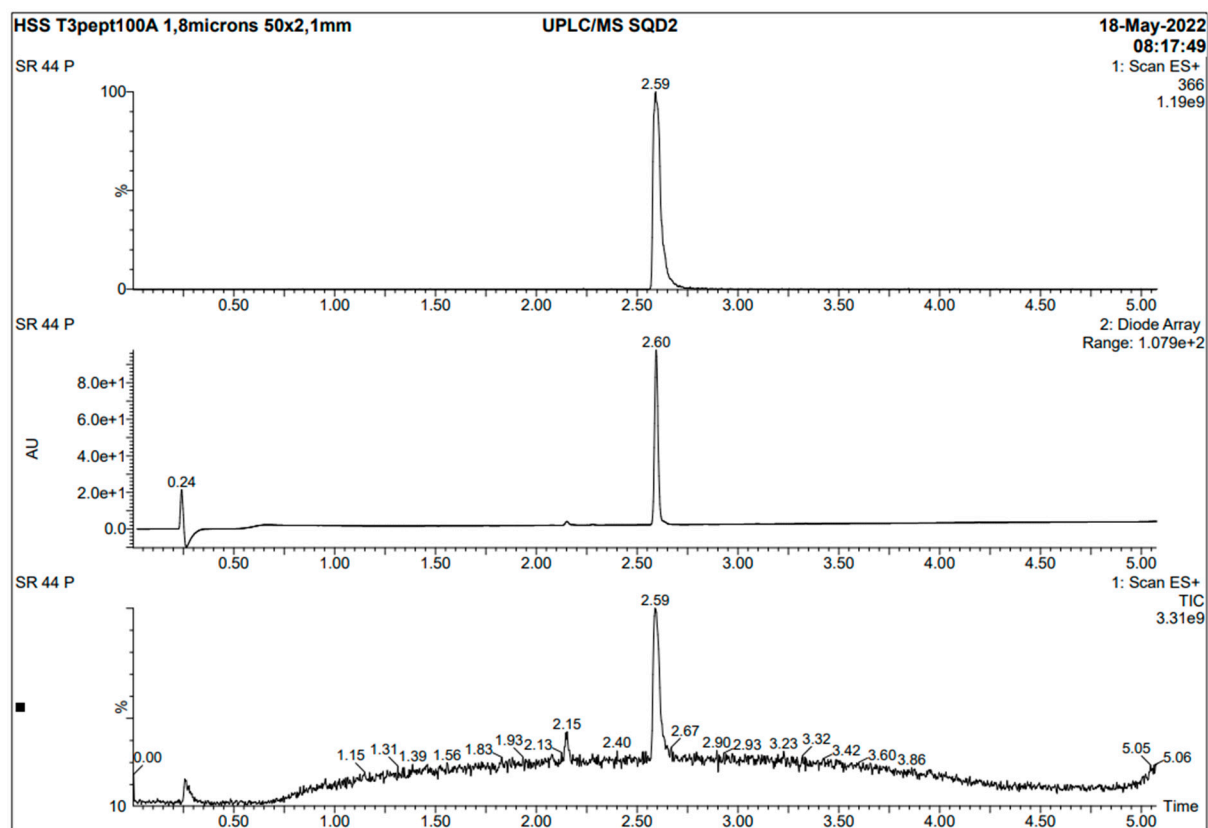

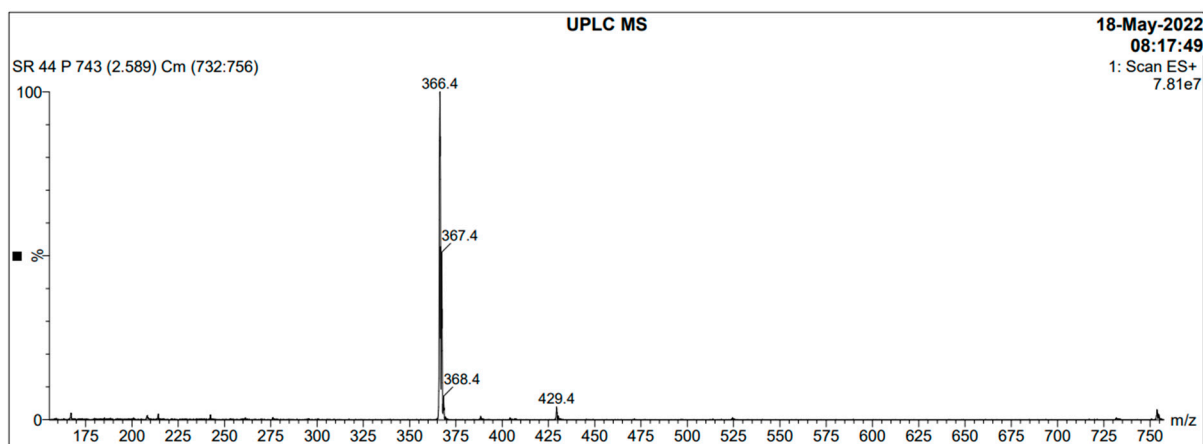

## Acquisition Parameter

Source Type ESI Ion Polarity Positive Scan Begin 50 m/z Scan End 2200 m/z

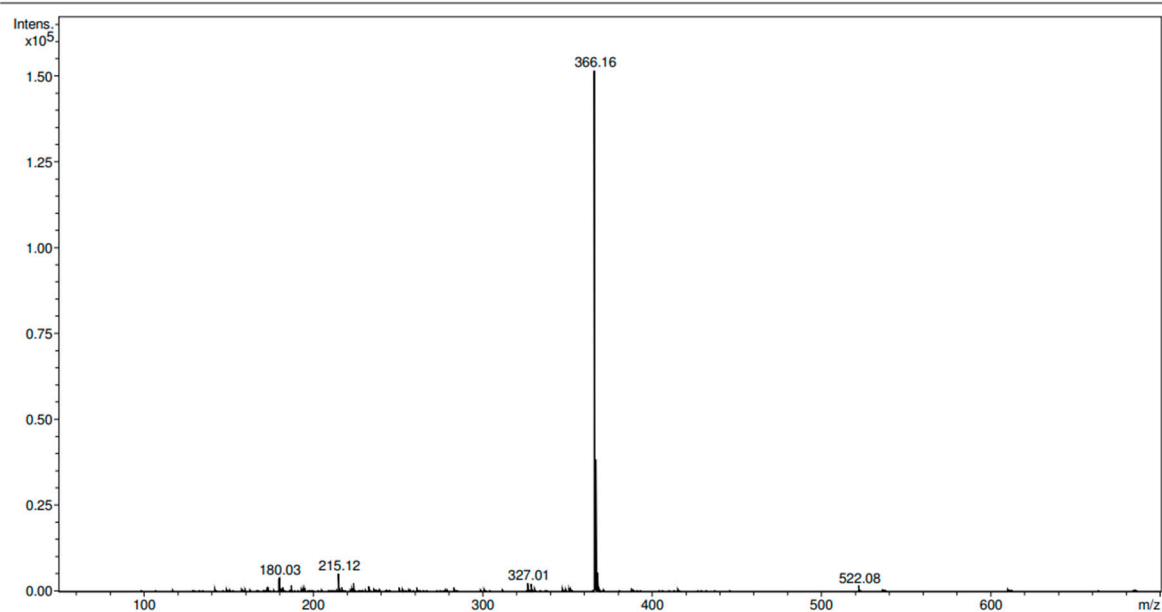

## Acquisition Parameter

Source Type ESI Ion Polarity Positive Scan Begin 50 m/z Scan End 2200 m/z

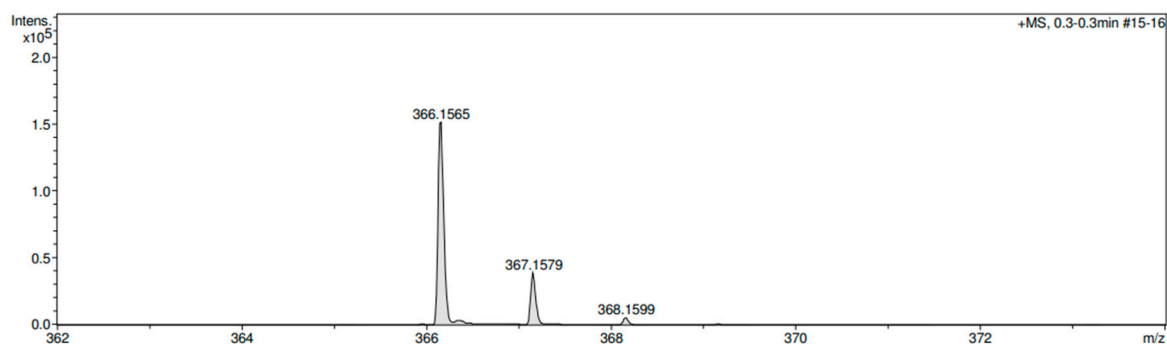

| Meas. m/z | # | Ion Formula                                                   | m/z      | err [ppm] | mSigma | # Sigma | Score  | rdB  | e <sup>-</sup> Conf | N-Rule |
|-----------|---|---------------------------------------------------------------|----------|-----------|--------|---------|--------|------|---------------------|--------|
| 366.1565  | 1 | C <sub>19</sub> H <sub>20</sub> N <sub>5</sub> O <sub>3</sub> | 366.1561 | 1.1       | 15.8   | 1       | 100.00 | 12.5 | even                | ok     |

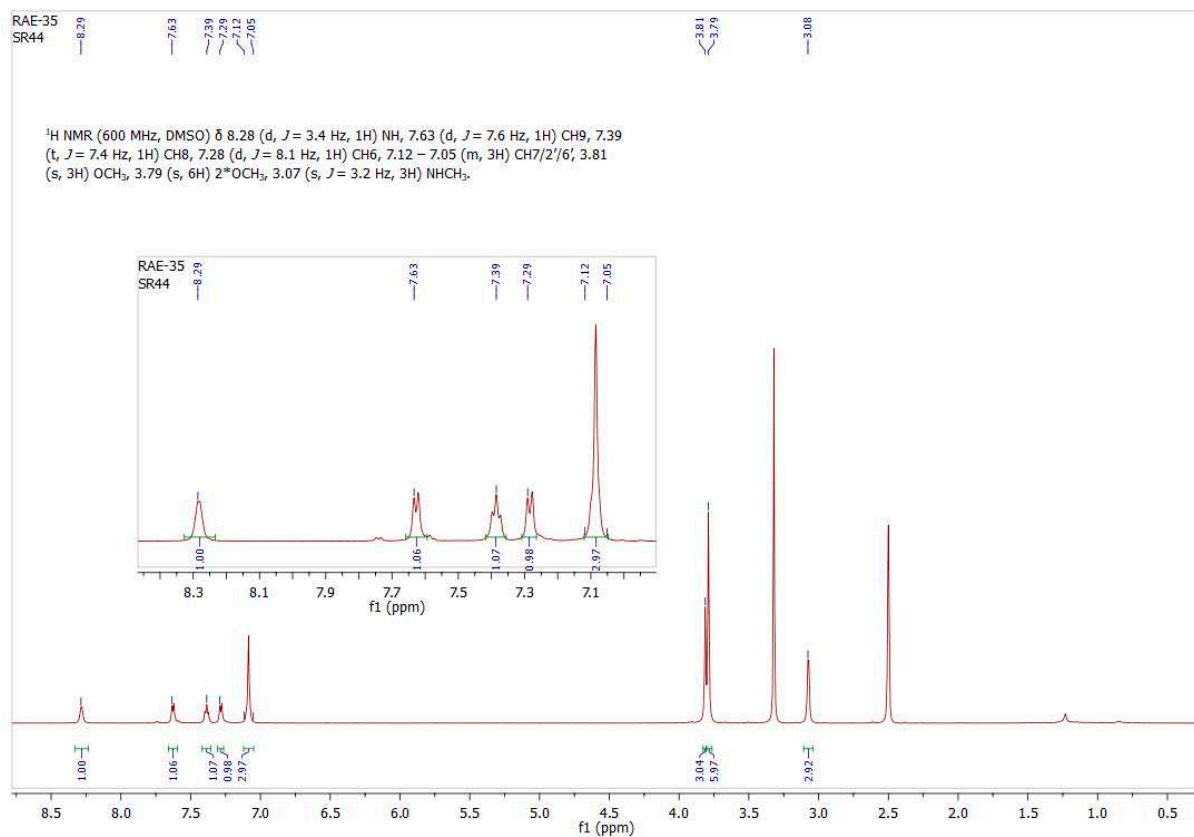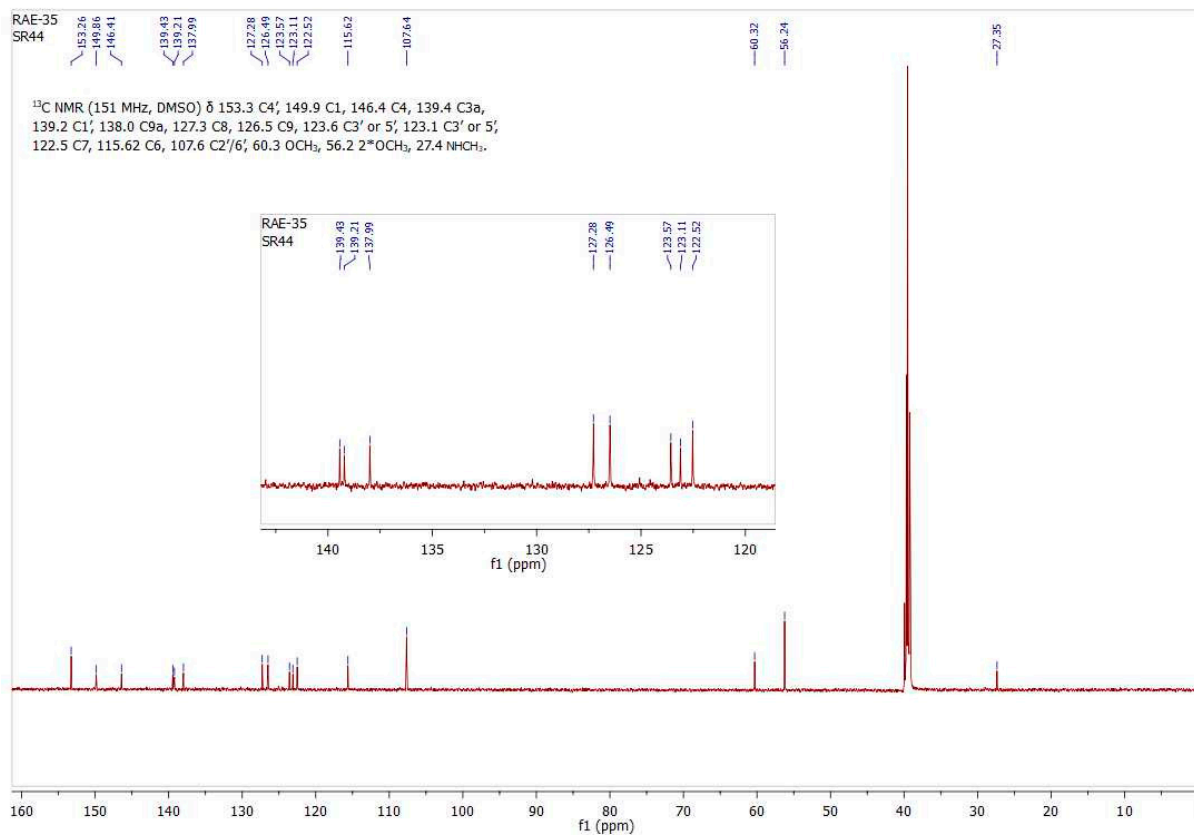

S29. *N*-methyl-1-(pyridin-3-yl)-[1,2,4]triazolo[4,3-*a*]quinoxalin-4-amine (**16e**).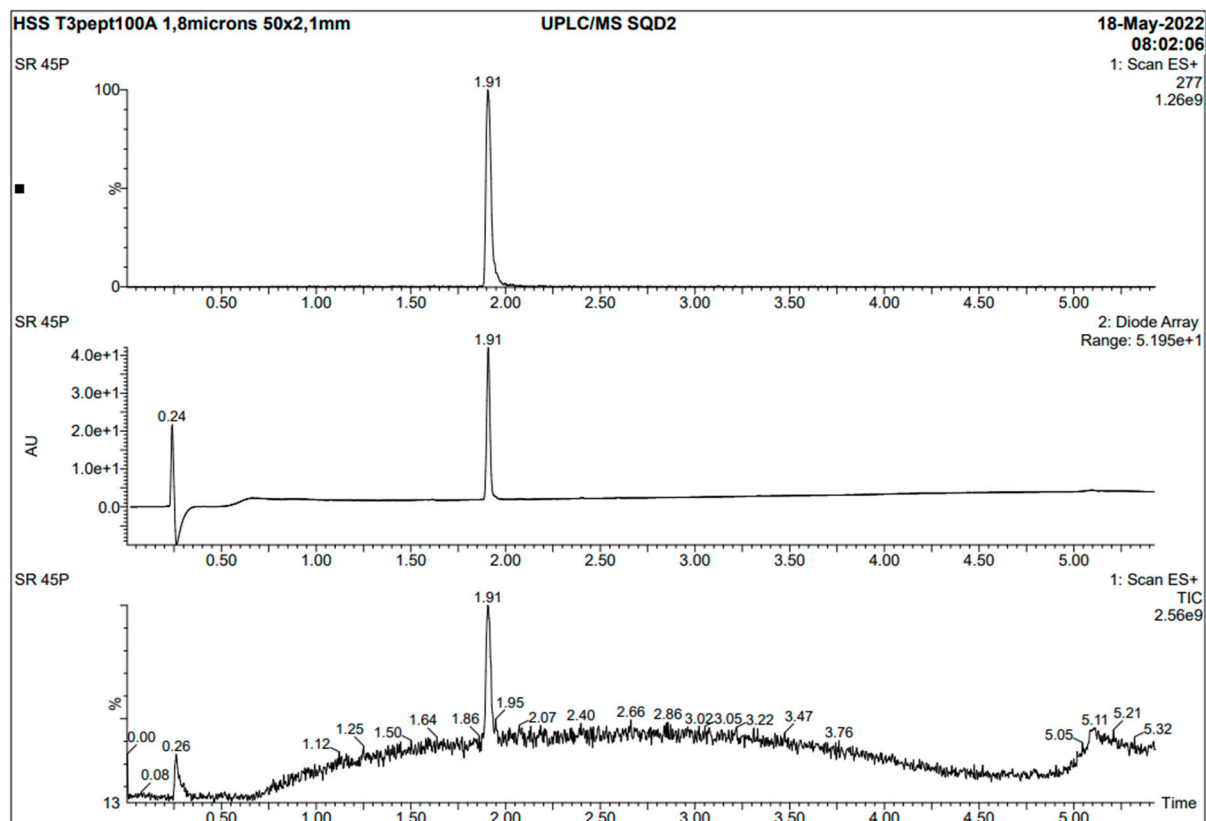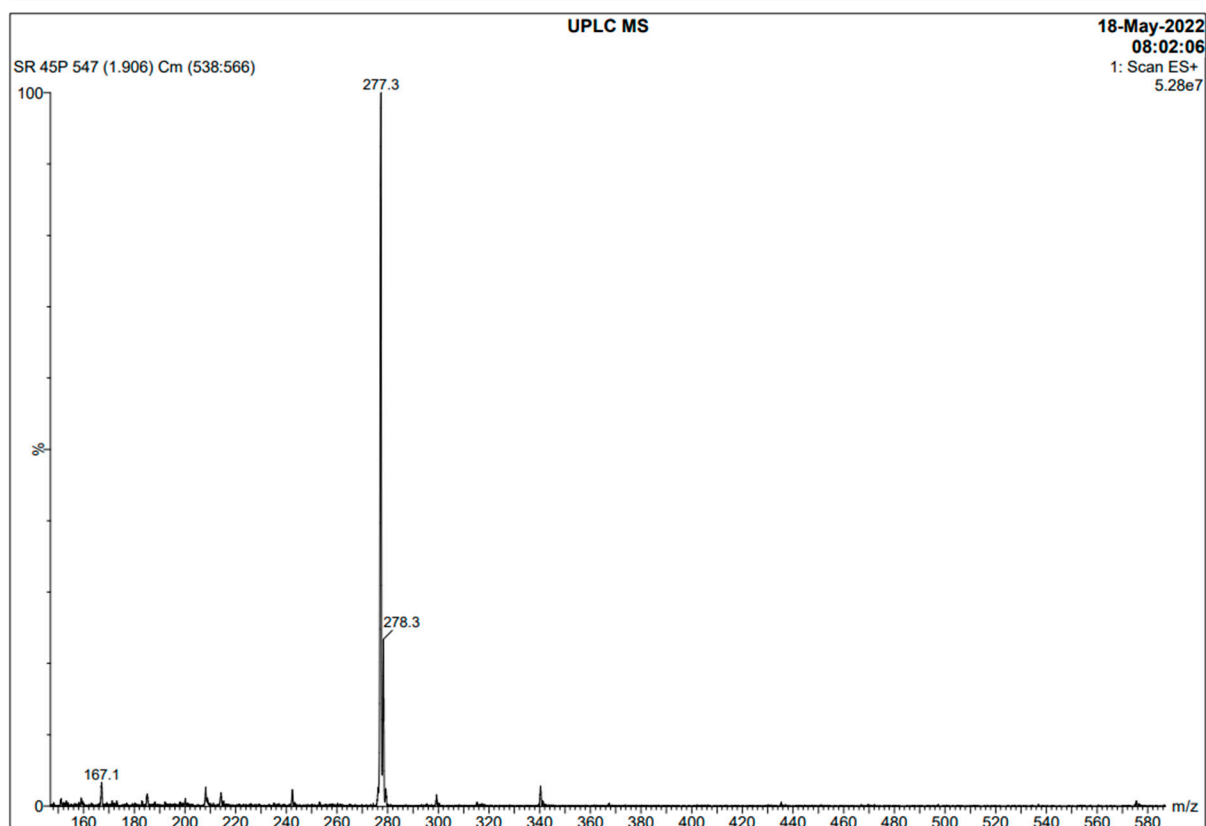



## Acquisition Parameter

Source Type ESI Ion Polarity Positive Scan Begin 50 m/z Scan End 2200 m/z

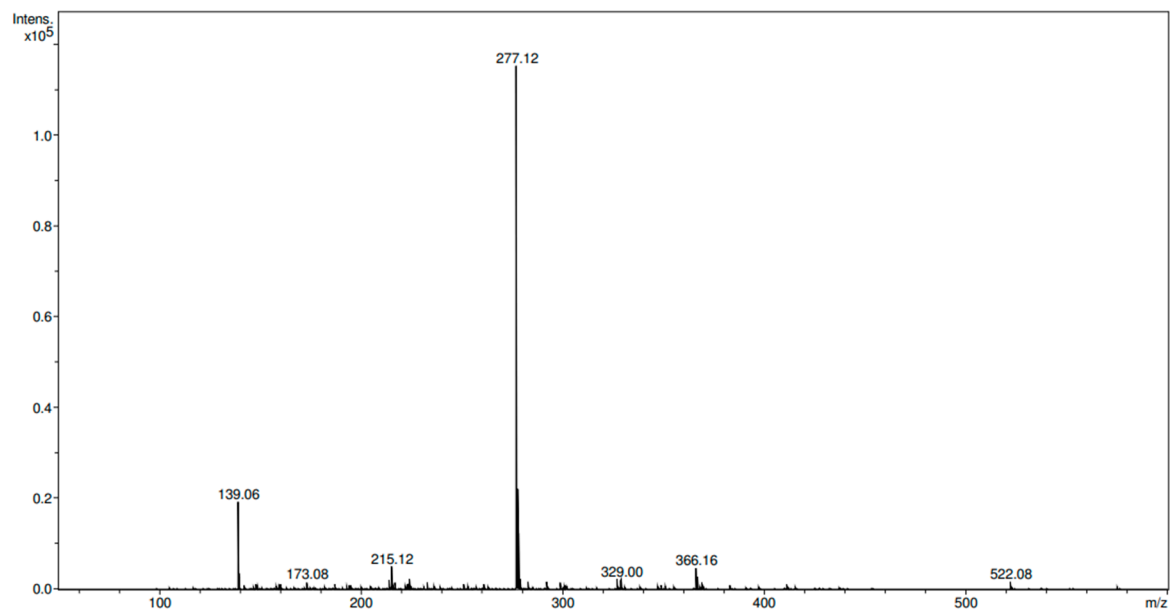

## Acquisition Parameter

Source Type ESI Ion Polarity Positive Scan Begin 50 m/z Scan End 2200 m/z

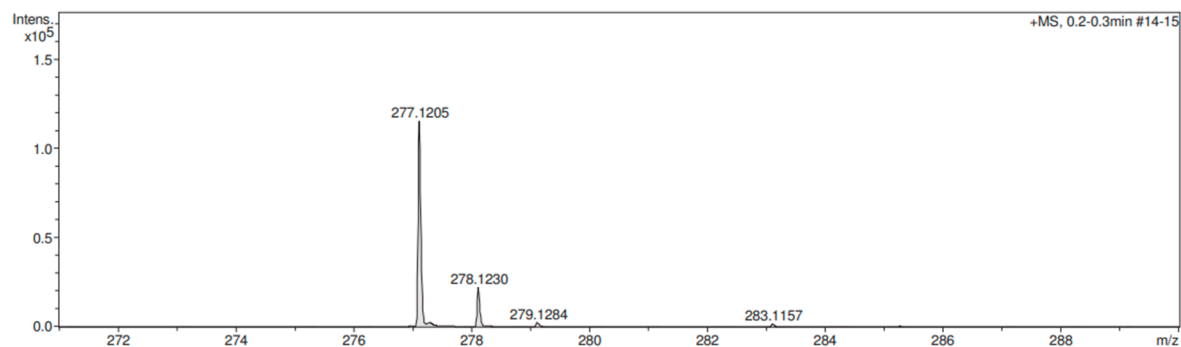

| Meas. m/z | # | Ion Formula                                    | m/z      | err [ppm] | mSigma | # Sigma | Score  | rdB  | e <sup>-</sup> Conf | N-Rule |
|-----------|---|------------------------------------------------|----------|-----------|--------|---------|--------|------|---------------------|--------|
| 277.1205  | 1 | C <sub>15</sub> H <sub>13</sub> N <sub>6</sub> | 277.1196 | 3.0       | 4.1    | 1       | 100.00 | 12.5 | even                | ok     |



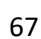

S30. *N*-methyl-1-phenethyl-[1,2,4]triazolo[4,3-*a*]quinoxalin-4-amine (**16f**).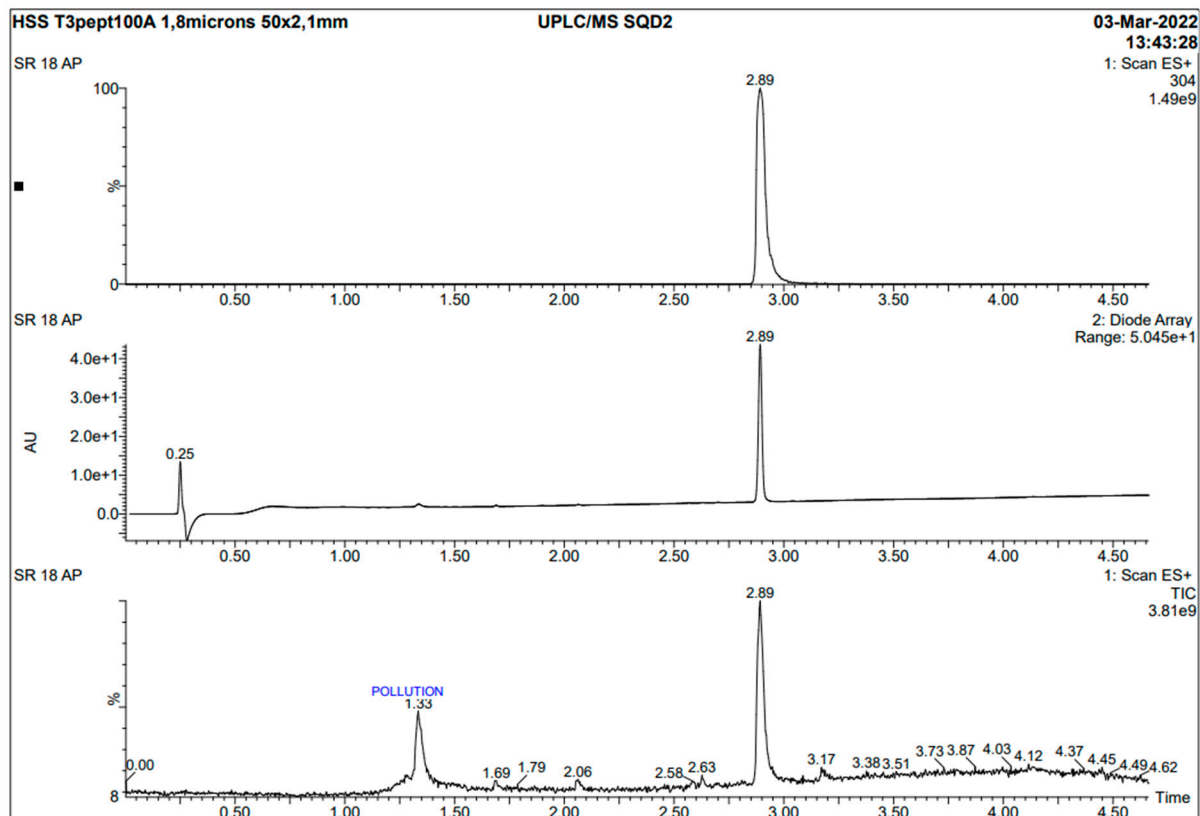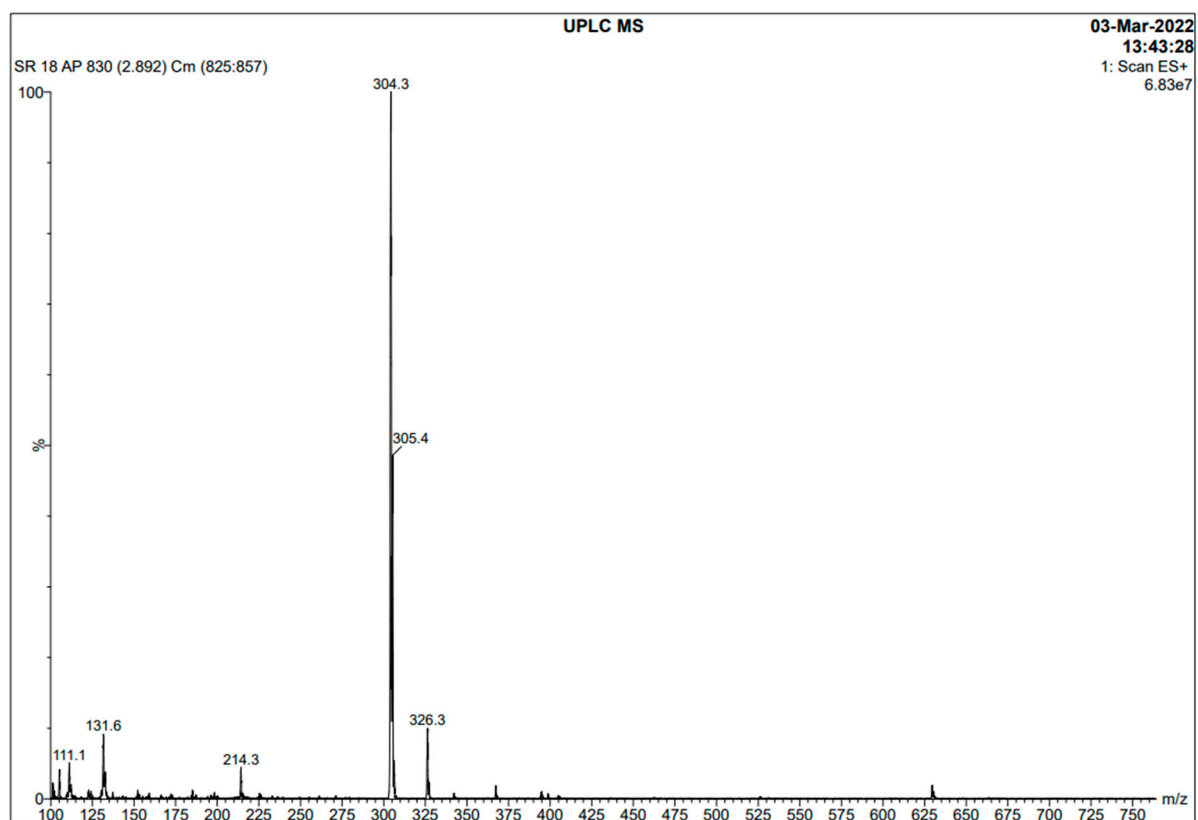



## Acquisition Parameter

Source Type ESI Ion Polarity Positive Scan Begin 50 m/z Scan End 2200 m/z

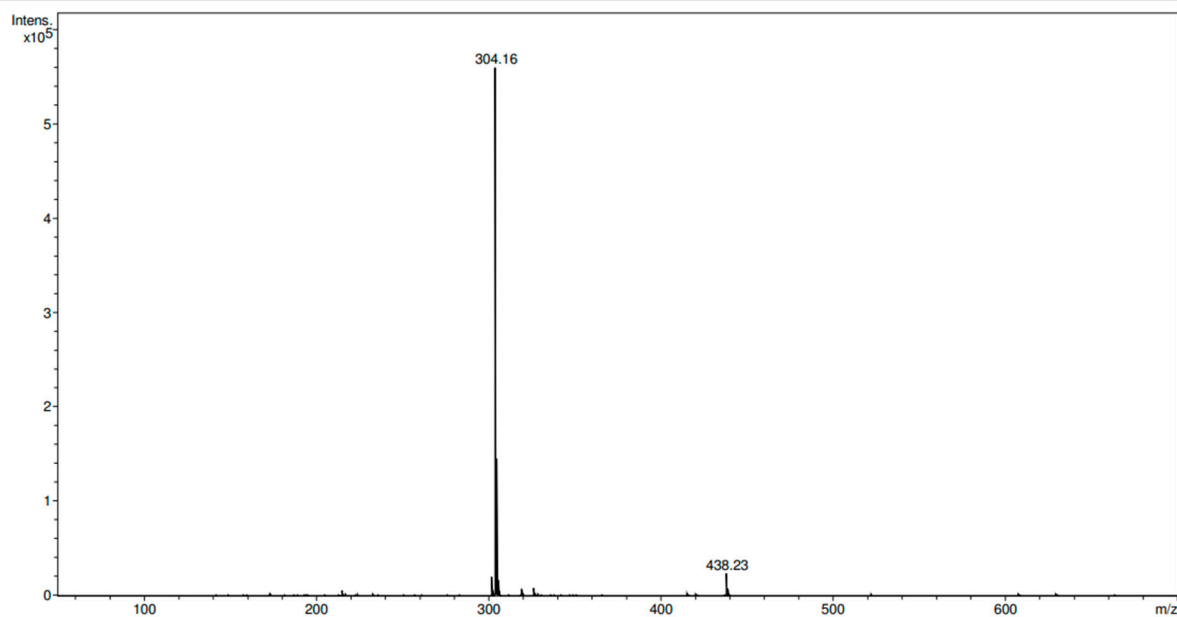

## Acquisition Parameter

Source Type ESI Ion Polarity Positive Scan Begin 50 m/z Scan End 2200 m/z

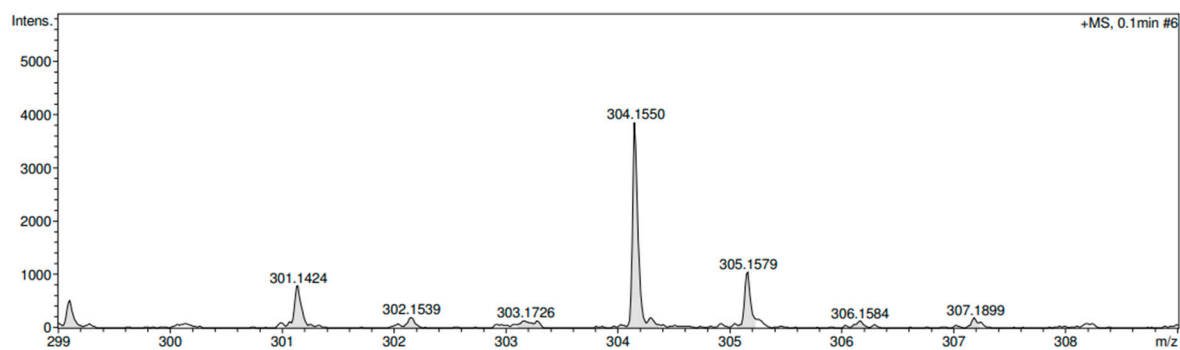

| Meas. m/z | # | Ion Formula                                    | m/z      | err [ppm] | mSigma | # Sigma | Score  | rdB  | e <sup>-</sup> Conf | N-Rule |
|-----------|---|------------------------------------------------|----------|-----------|--------|---------|--------|------|---------------------|--------|
| 304.1550  | 1 | C <sub>18</sub> H <sub>18</sub> N <sub>5</sub> | 304.1557 | 2.1       | 32.5   | 1       | 100.00 | 12.5 | even                | ok     |

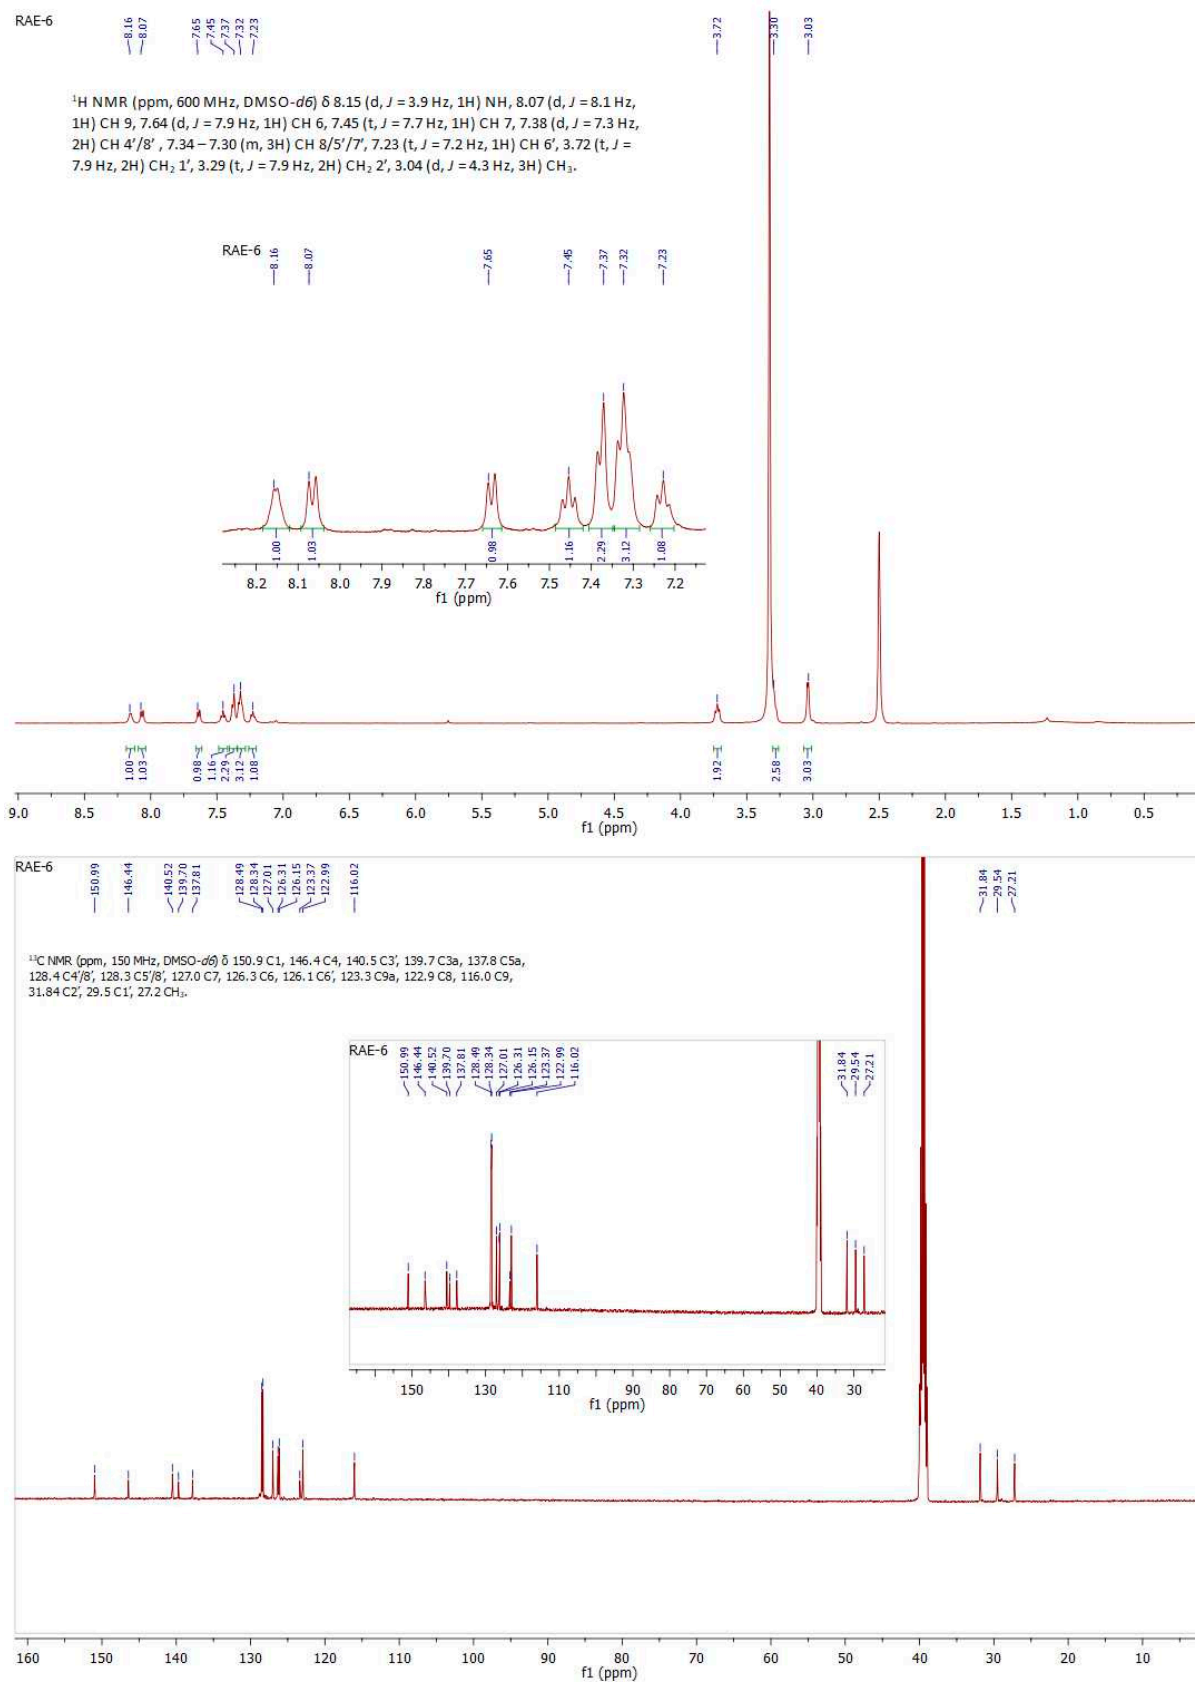

S31. 1-butyl-N-methyl-[1,2,4]triazolo[4,3-a]quinoxalin-4-amine (**16g**).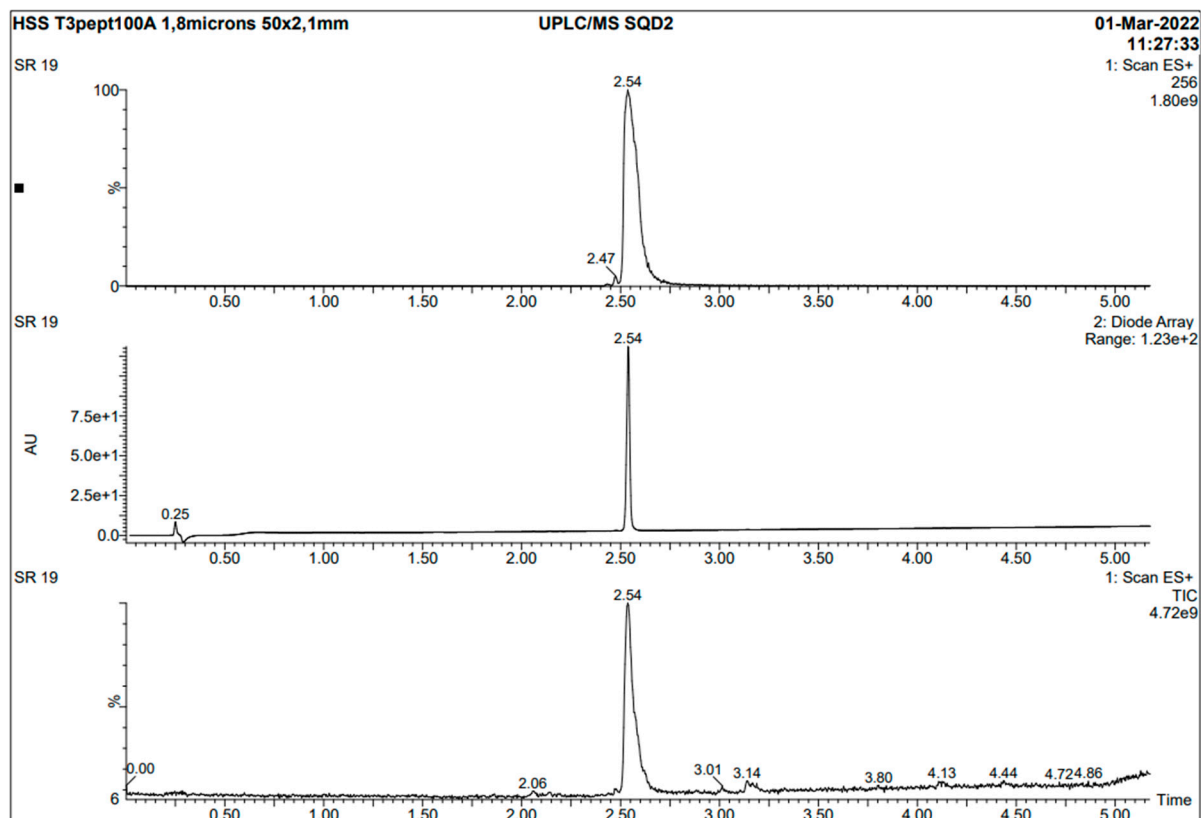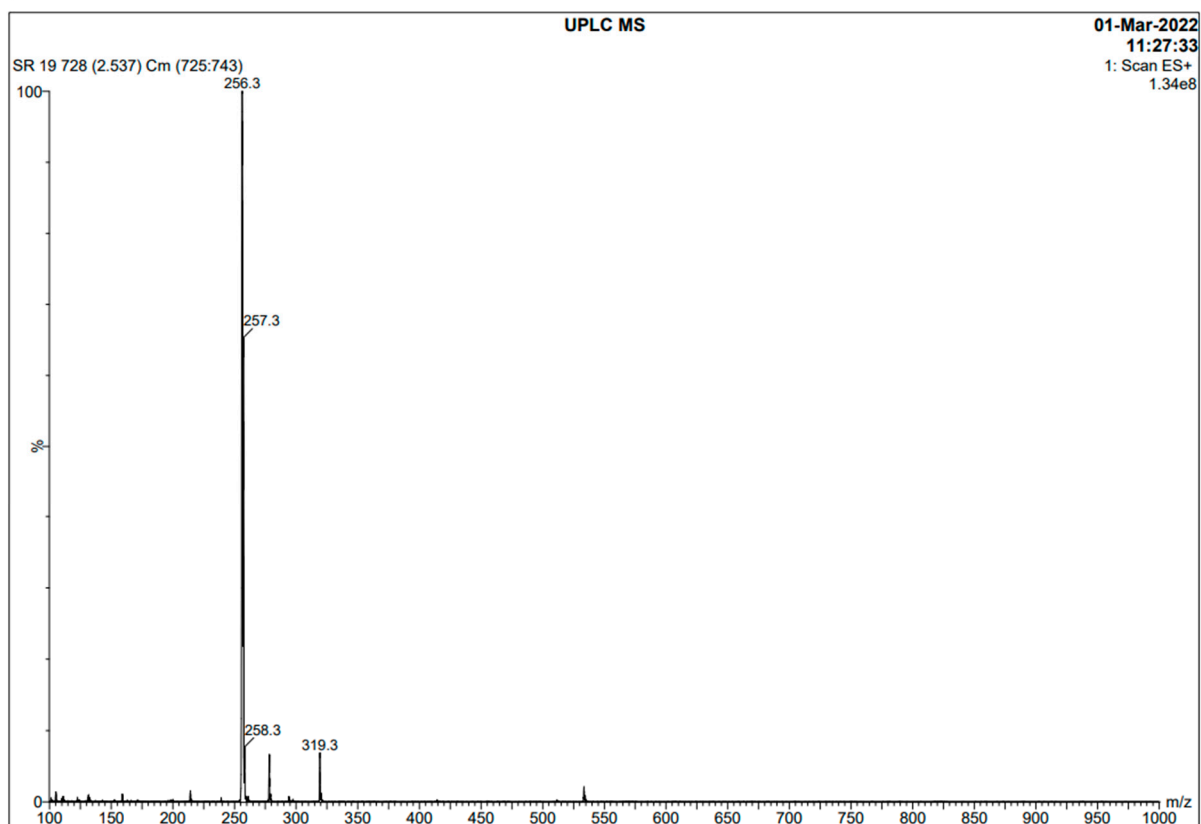



## Acquisition Parameter

Source Type ESI Ion Polarity Positive Scan Begin 50 m/z Scan End 2200 m/z

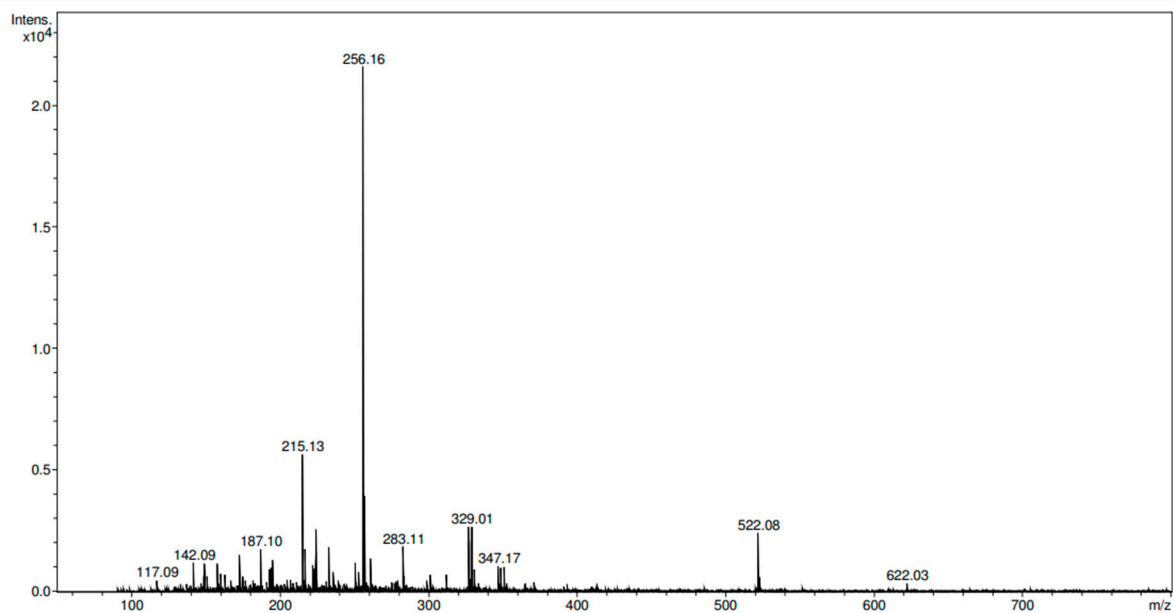

## Acquisition Parameter

Source Type ESI Ion Polarity Positive Scan Begin 50 m/z Scan End 2200 m/z

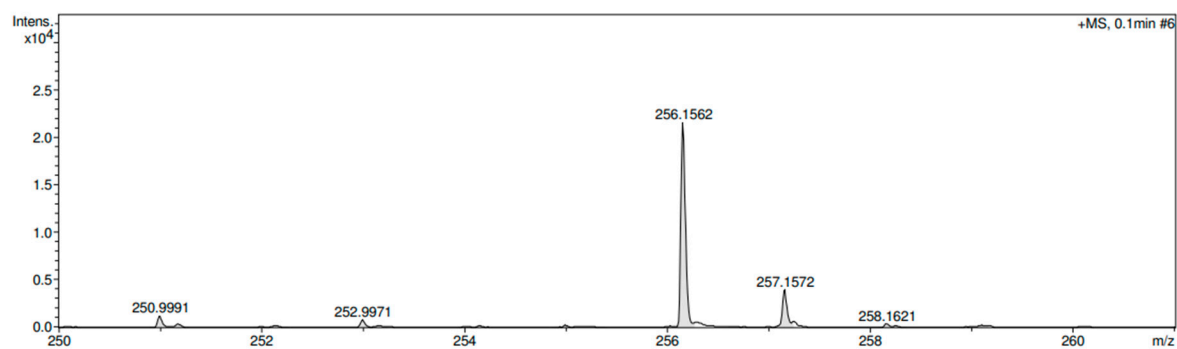

| Meas. m/z | # | Ion Formula                                    | m/z      | err [ppm] | mSigma | # Sigma | Score  | rdB | e <sup>-</sup> | Conf | N-Rule |
|-----------|---|------------------------------------------------|----------|-----------|--------|---------|--------|-----|----------------|------|--------|
| 256.1562  | 1 | C <sub>14</sub> H <sub>18</sub> N <sub>5</sub> | 256.1557 | 2.1       | 6.6    | 1       | 100.00 | 8.5 | even           |      | ok     |

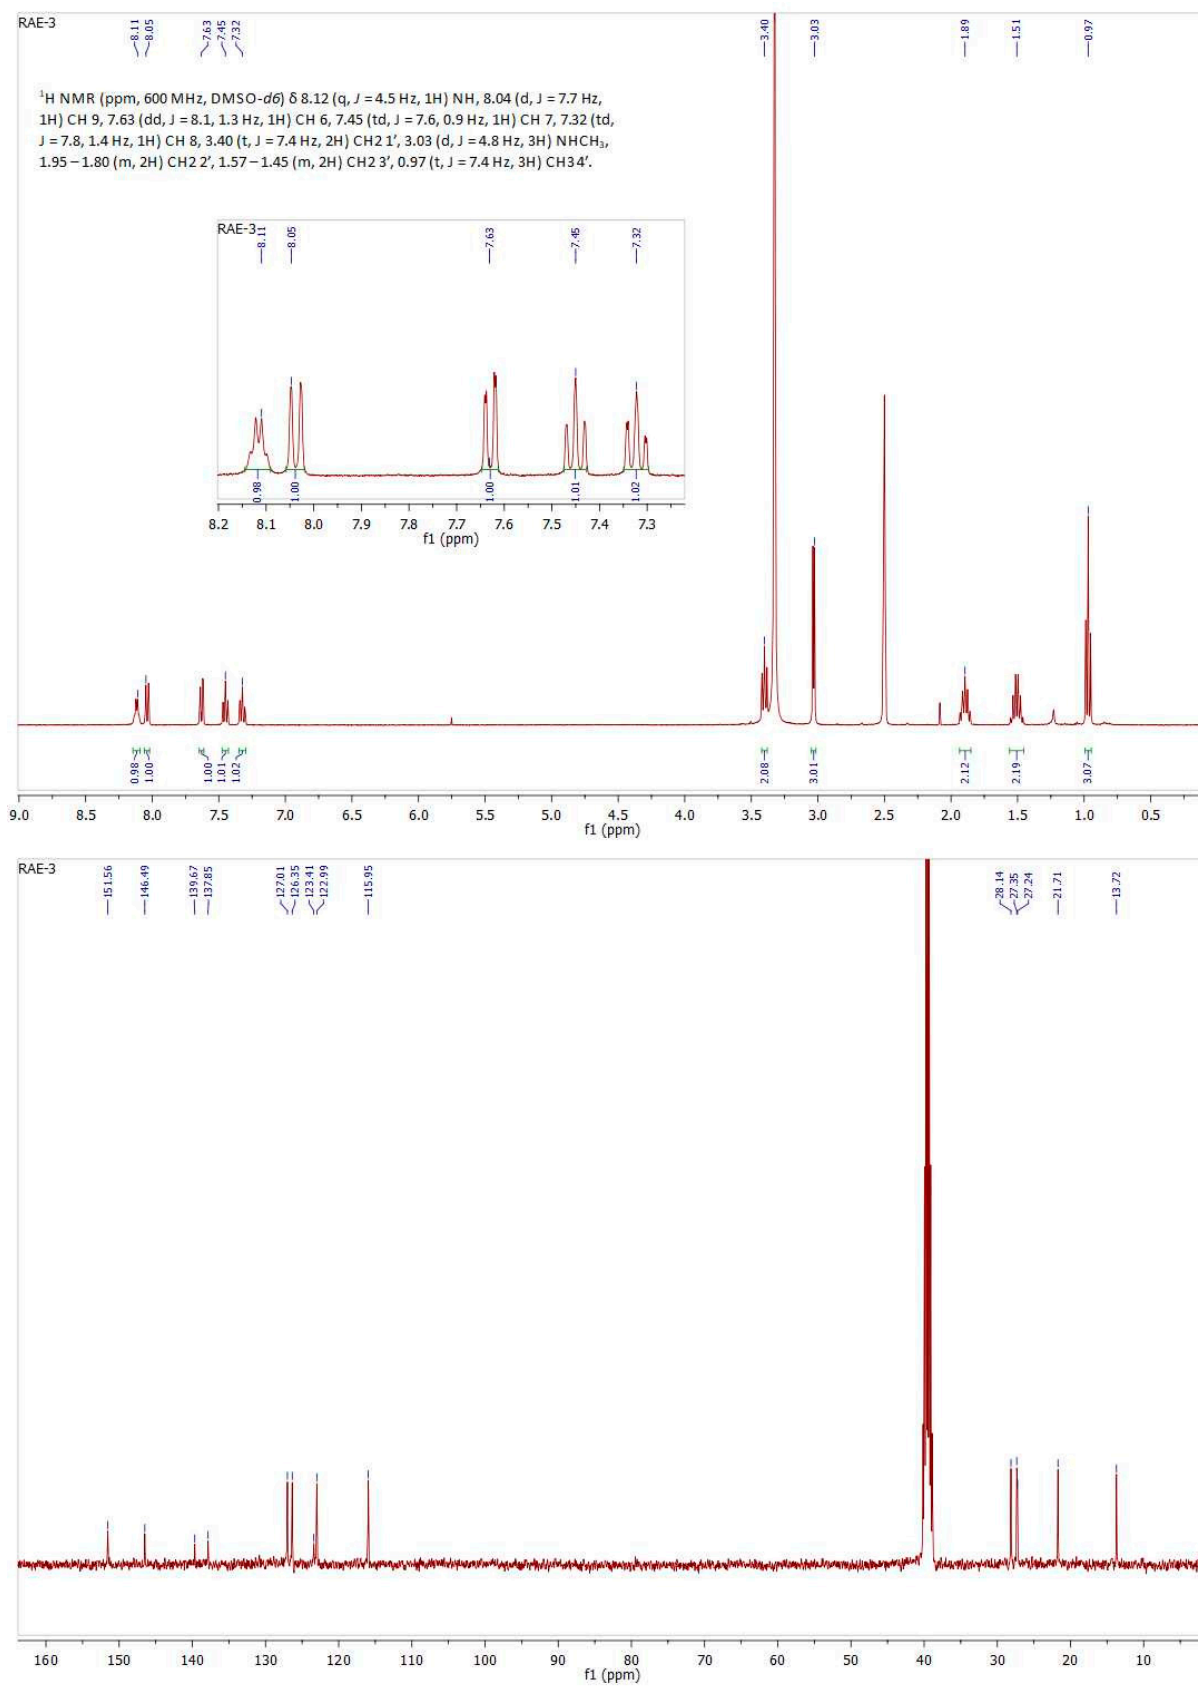

S32. 1-isobutyl-N-methyl-[1,2,4]triazolo[4,3-a]quinoxalin-4-amine (**16h**).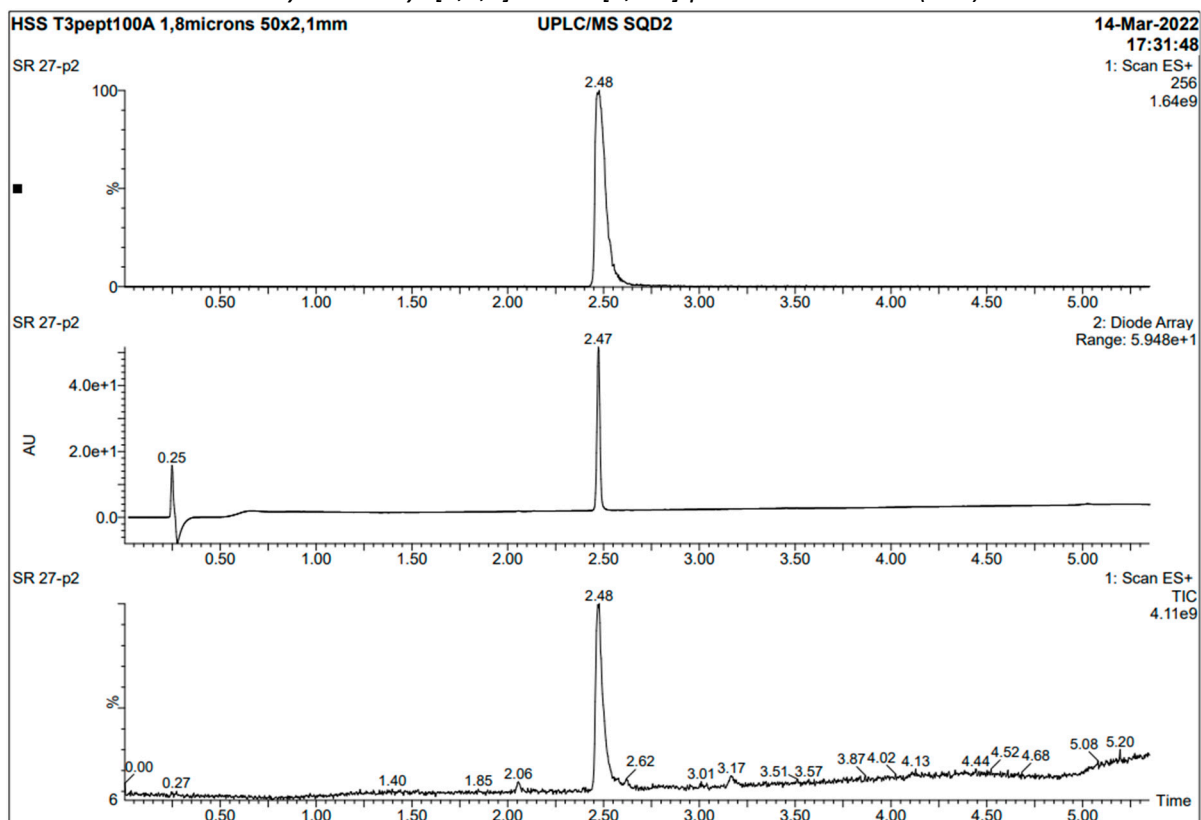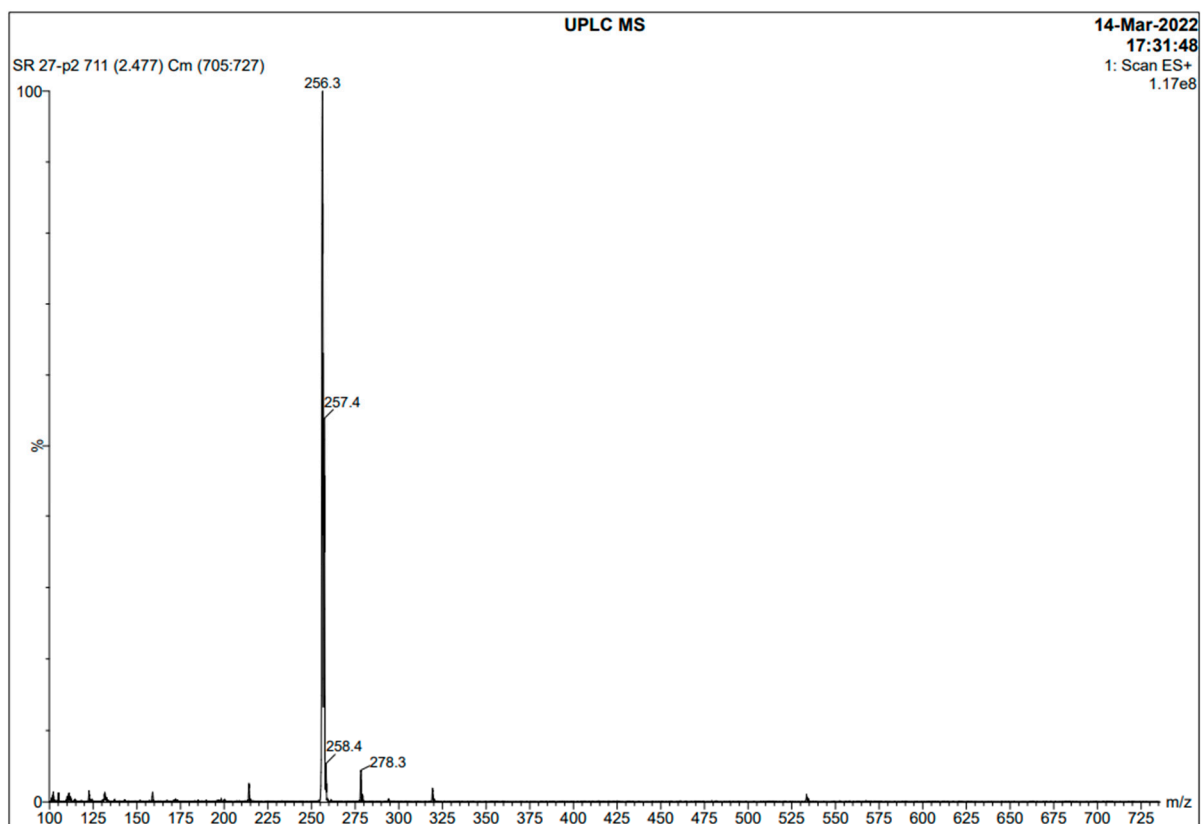





## Acquisition Parameter

Source Type ESI Ion Polarity Positive Scan Begin 50 m/z Scan End 2200 m/z

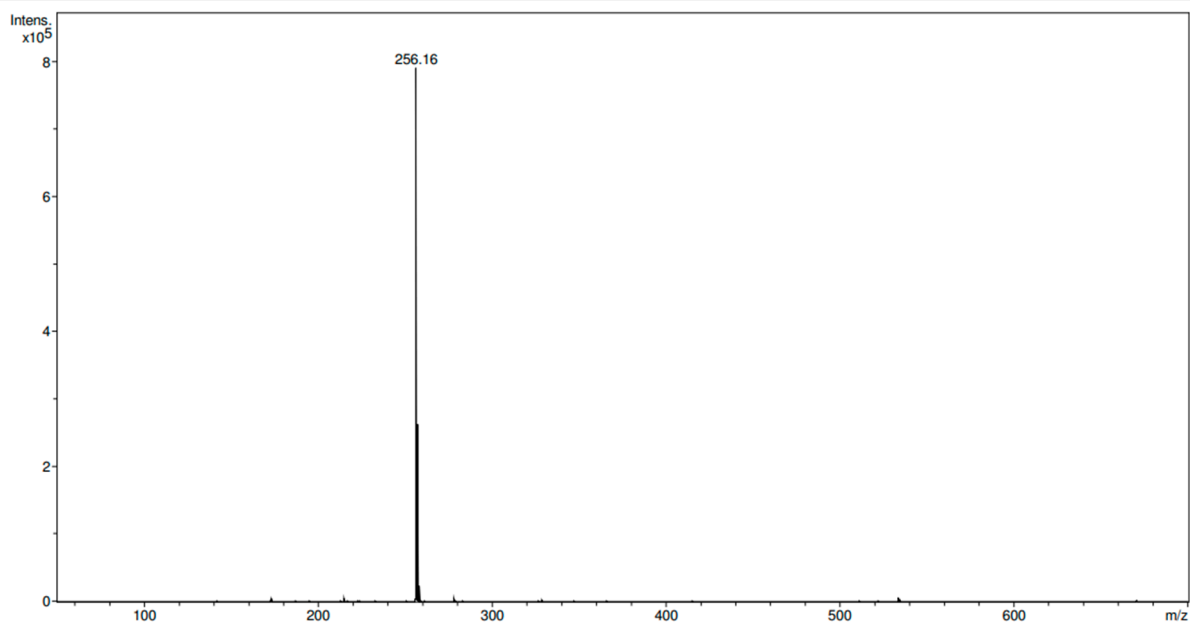

## Acquisition Parameter

Source Type ESI Ion Polarity Positive Scan Begin 50 m/z Scan End 2200 m/z

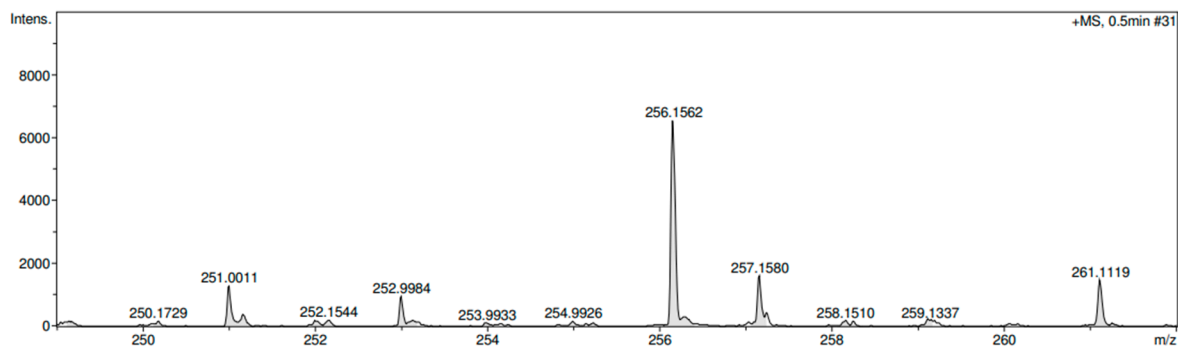

| Meas. m/z | # | Ion Formula                                     | m/z      | err [ppm] | mSigma | # Sigma | Score  | rdB | e <sup>-</sup> | Conf | N-Rule |
|-----------|---|-------------------------------------------------|----------|-----------|--------|---------|--------|-----|----------------|------|--------|
| 256.1562  | 1 | C <sub>14</sub> H <sub>18</sub> N <sub>5</sub>  | 256.1557 | 2.0       | 43.7   | 1       | 100.00 | 8.5 | even           |      | ok     |
|           | 2 | C <sub>13</sub> H <sub>22</sub> NO <sub>4</sub> | 256.1543 | -7.2      | 56.7   | 2       | 29.86  | 3.5 | even           |      | ok     |

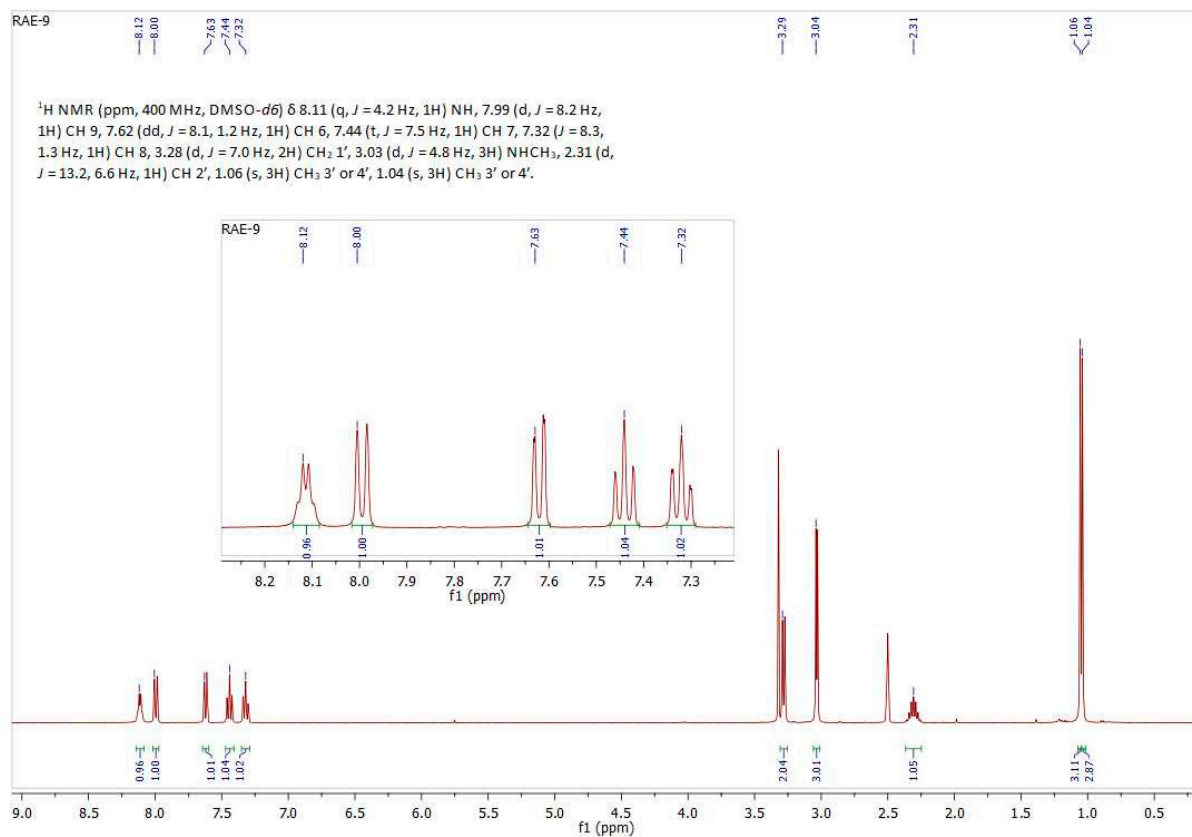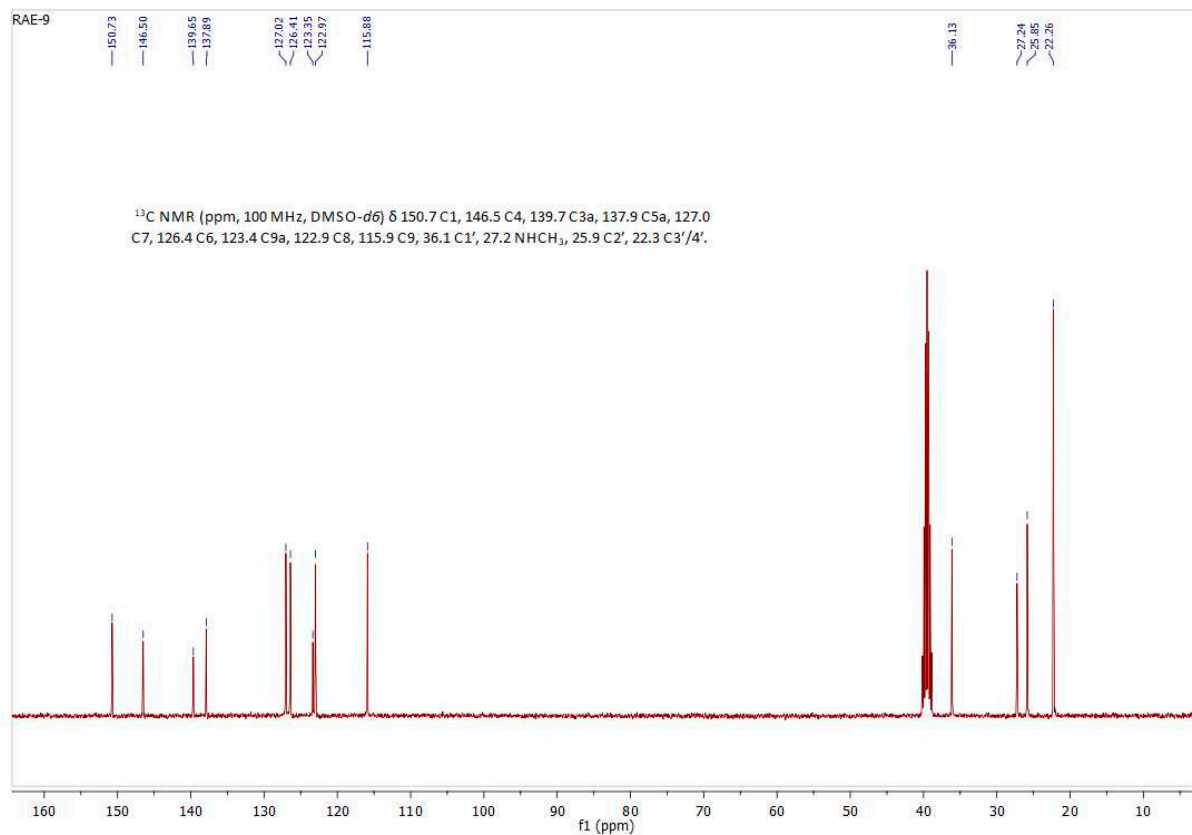

S33. *N*,1-dimethyl-[1,2,4]triazolo[4,3-*a*]quinoxalin-4-amine (**16i**).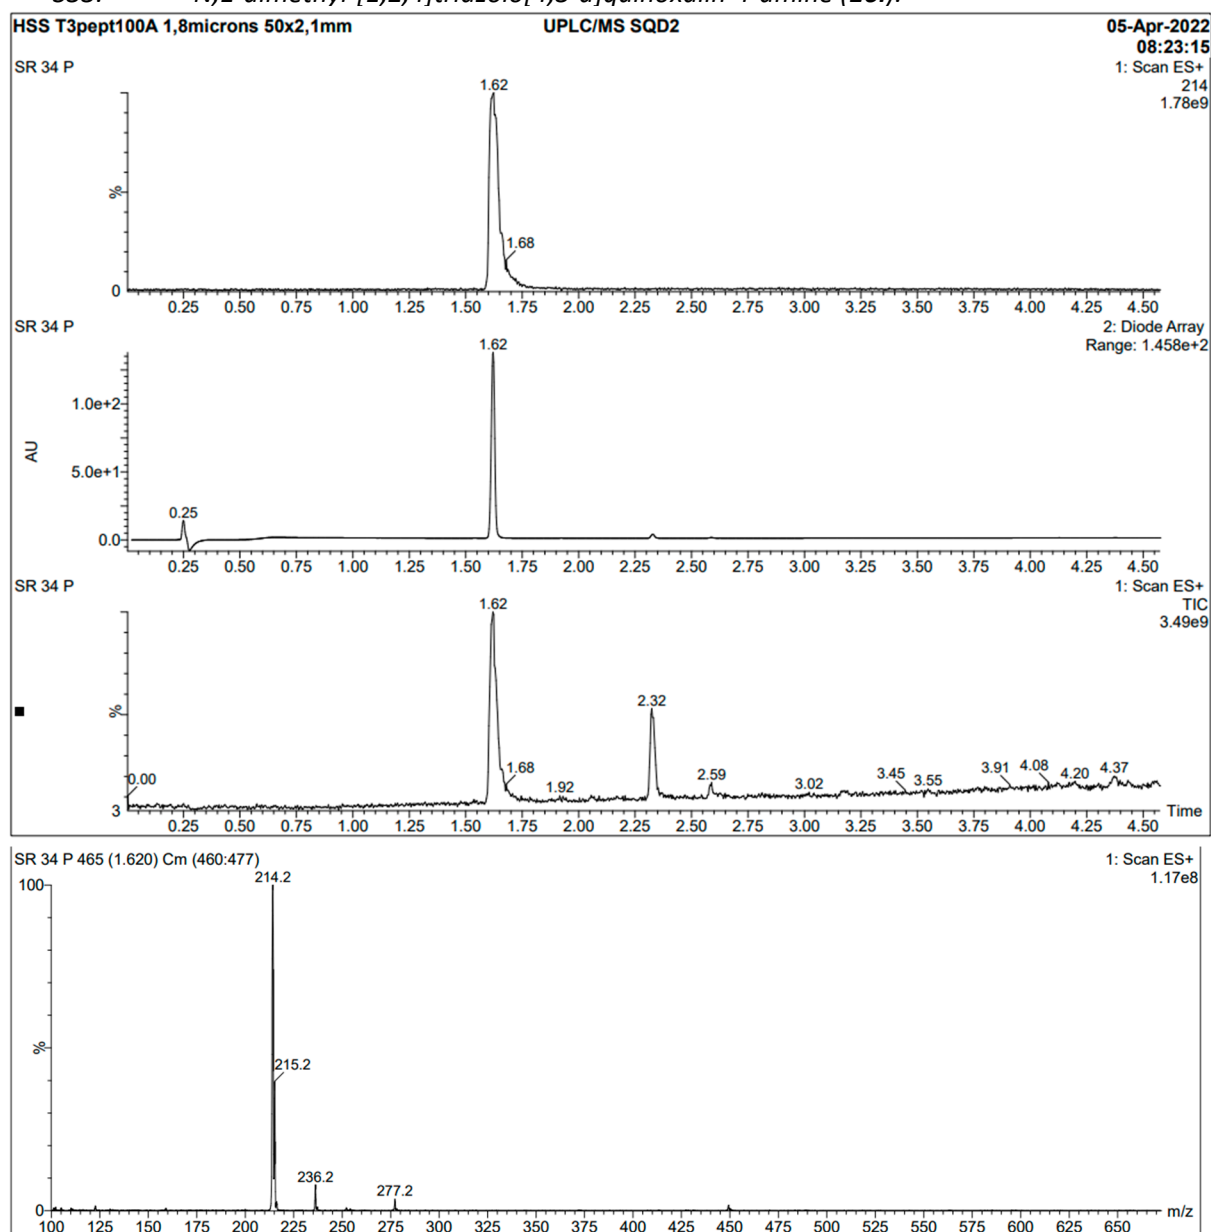



## Acquisition Parameter

Source Type ESI Ion Polarity Positive Scan Begin 50 m/z Scan End 2200 m/z

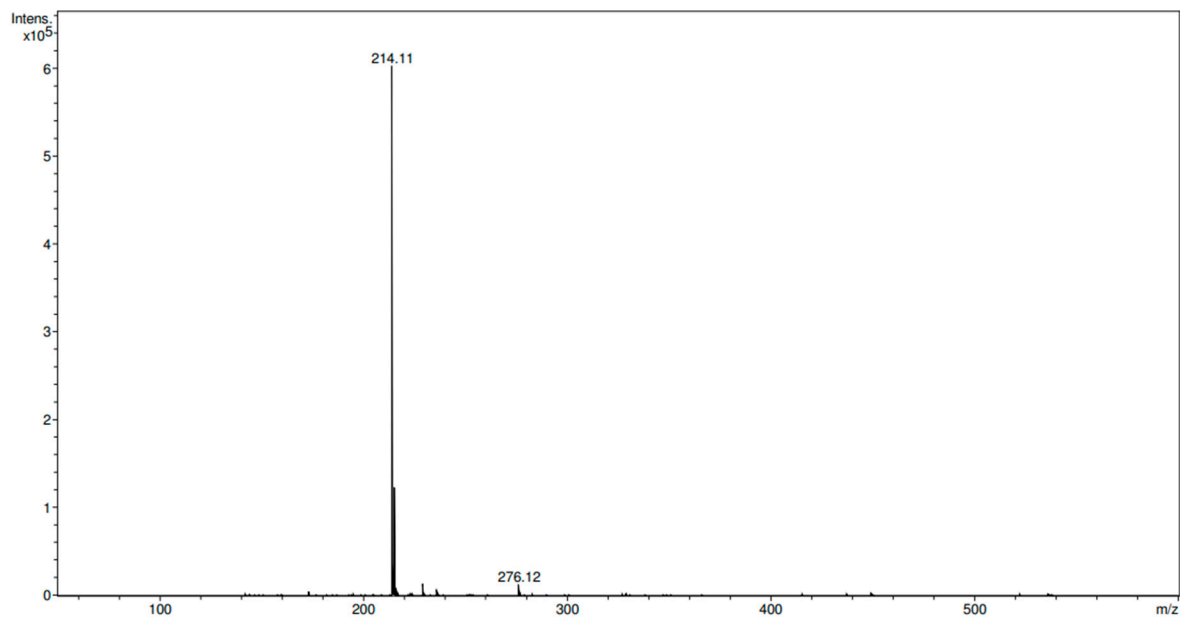

## Acquisition Parameter

Source Type ESI Ion Polarity Positive Scan Begin 50 m/z Scan End 2200 m/z

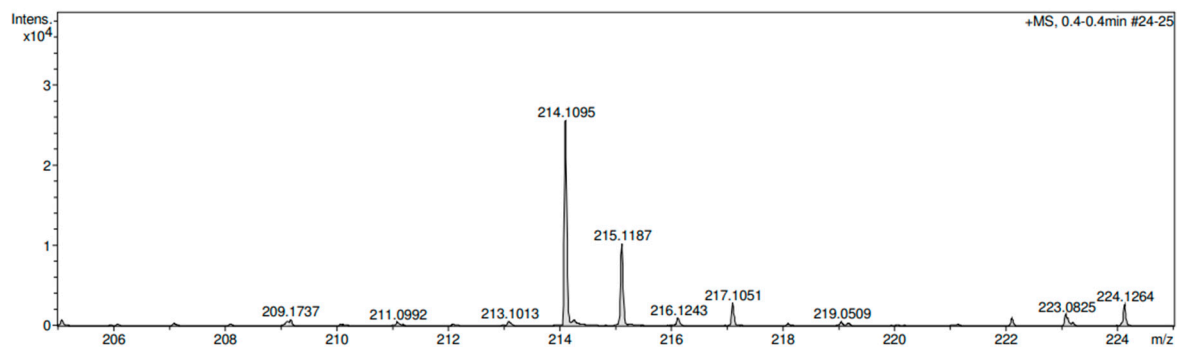

| Meas. m/z | # | Ion Formula | m/z      | err [ppm] | mSigma | # Sigma | Score  | rdb | e <sup>-</sup> | Conf | N-Rule |
|-----------|---|-------------|----------|-----------|--------|---------|--------|-----|----------------|------|--------|
| 214.1095  | 1 | C11H12N5    | 214.1087 | 3.8       | 153.8  | 1       | 100.00 | 8.5 | even           |      | ok     |

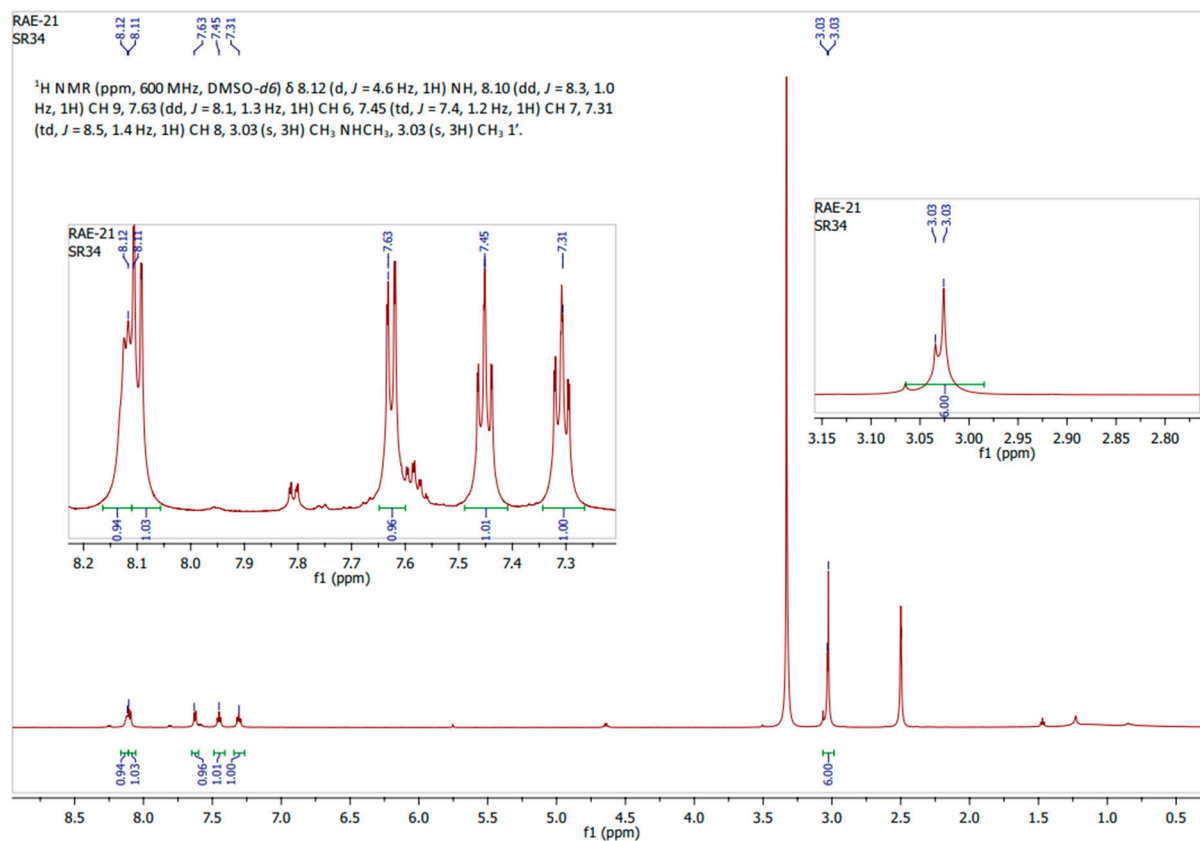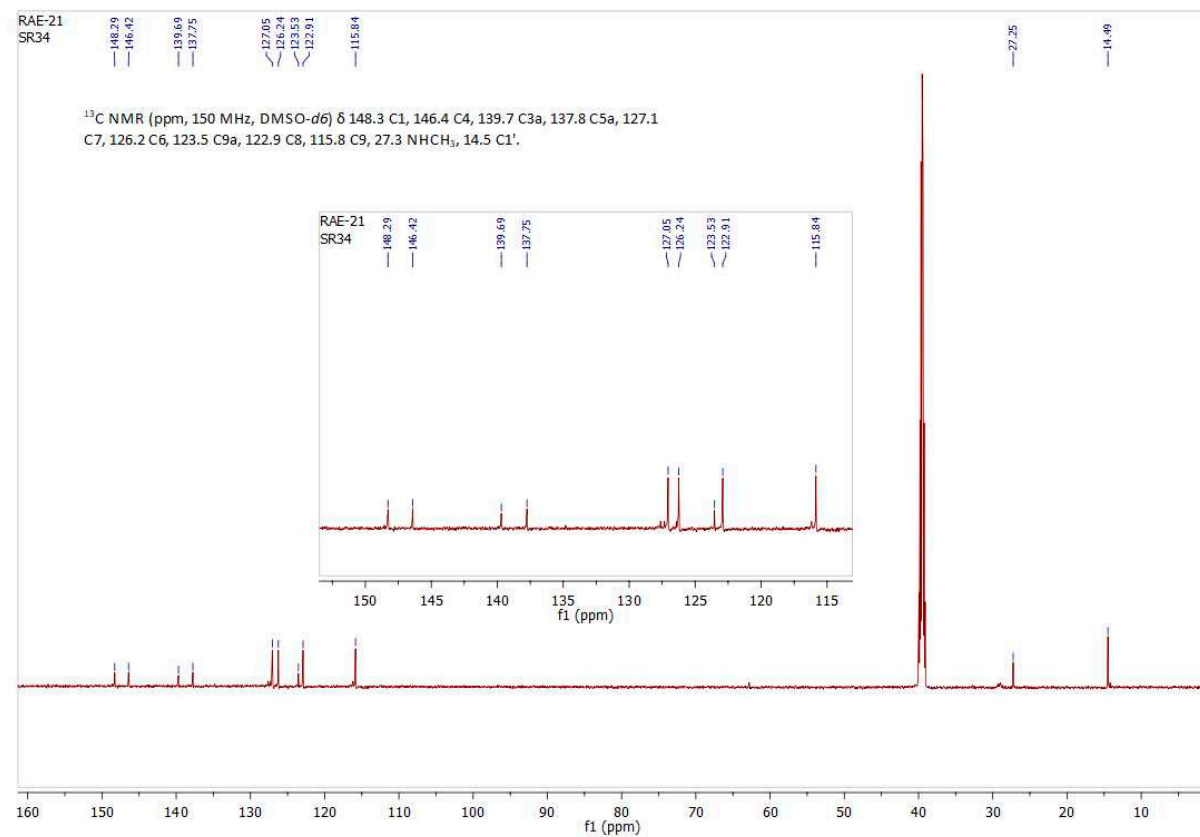

S34. 1-(3,4-dimethoxyphenyl)-[1,2,4]triazolo[4,3-a]quinoxalin-4-amine (**16j**).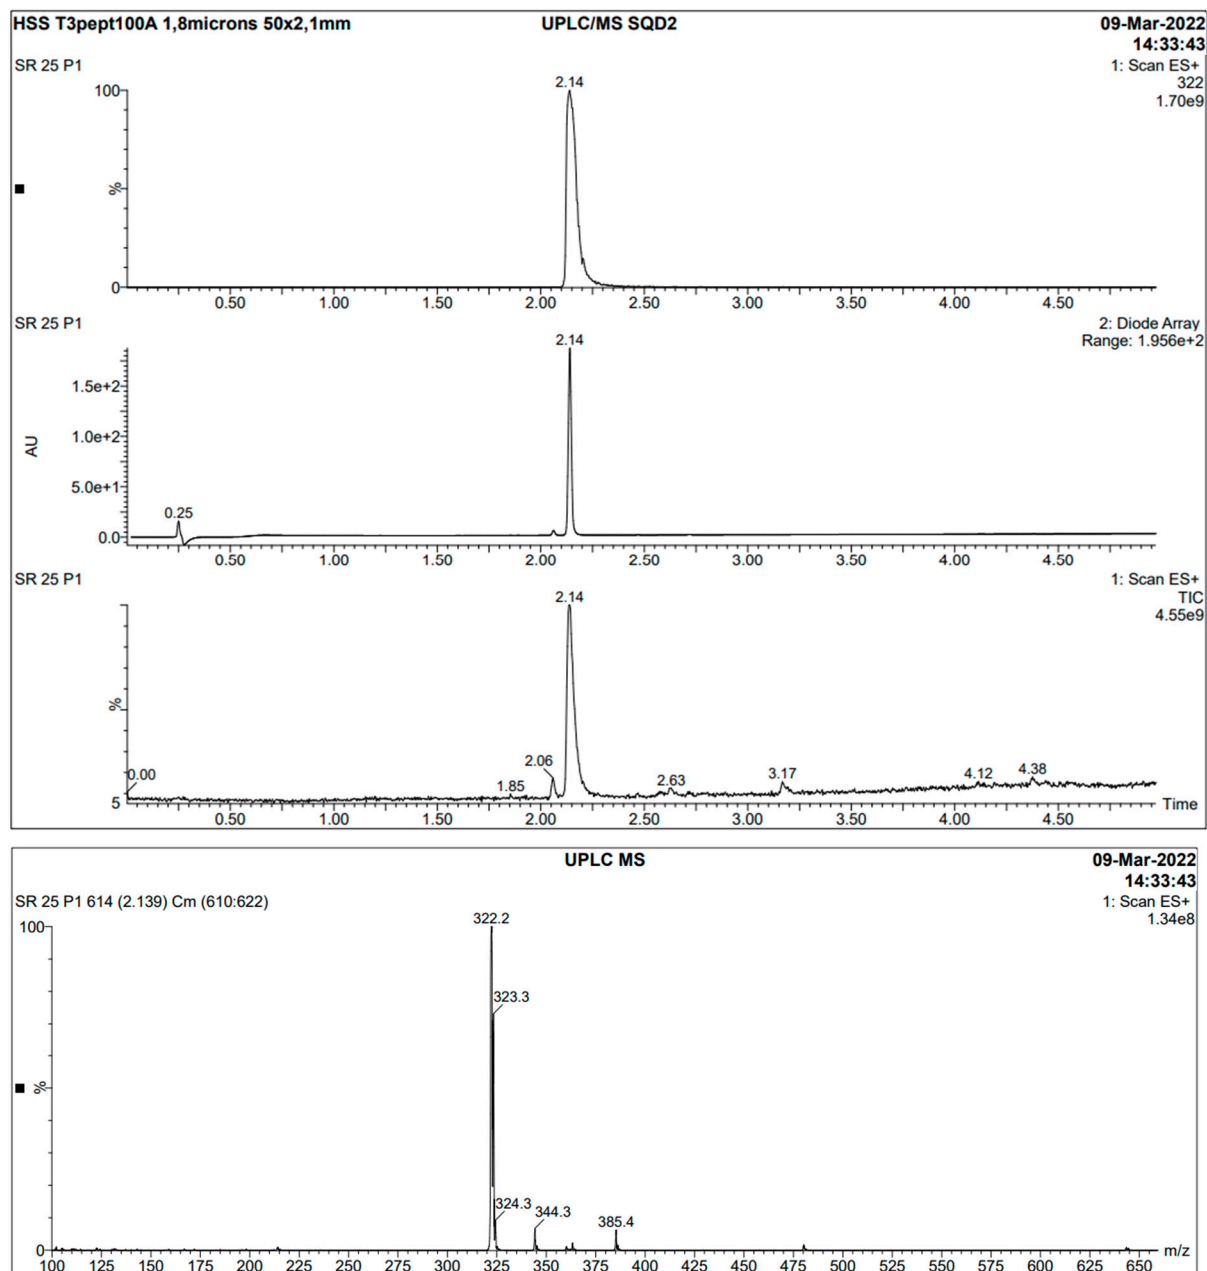



## Acquisition Parameter

Source Type ESI Ion Polarity Positive Scan Begin 50 m/z Scan End 2200 m/z

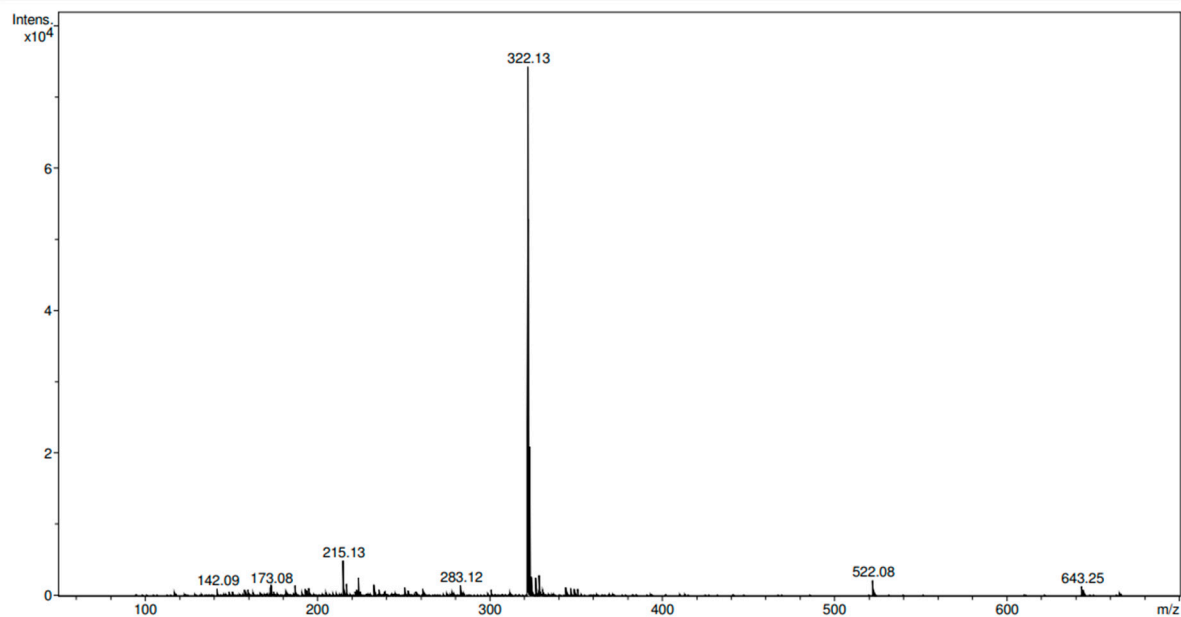

## Acquisition Parameter

Source Type ESI Ion Polarity Positive Scan Begin 50 m/z Scan End 2200 m/z

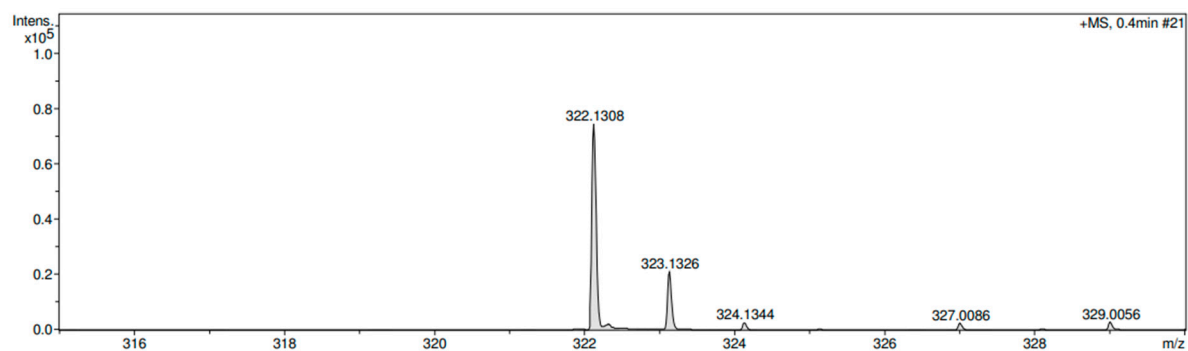

| Meas. m/z | # | Ion Formula                                                   | m/z      | err [ppm] | mSigma | # Sigma | Score  | rdB  | e <sup>-</sup> | Conf | N-Rule |
|-----------|---|---------------------------------------------------------------|----------|-----------|--------|---------|--------|------|----------------|------|--------|
| 322.1308  | 1 | C <sub>17</sub> H <sub>16</sub> N <sub>5</sub> O <sub>2</sub> | 322.1299 | -3.0      | 45.8   | 2       | 100.00 | 12.5 | even           |      | ok     |
|           | 2 | C <sub>16</sub> H <sub>20</sub> NO <sub>6</sub>               | 322.1285 | 7.2       | 59.0   | 3       | 26.15  | 7.5  | even           |      | ok     |

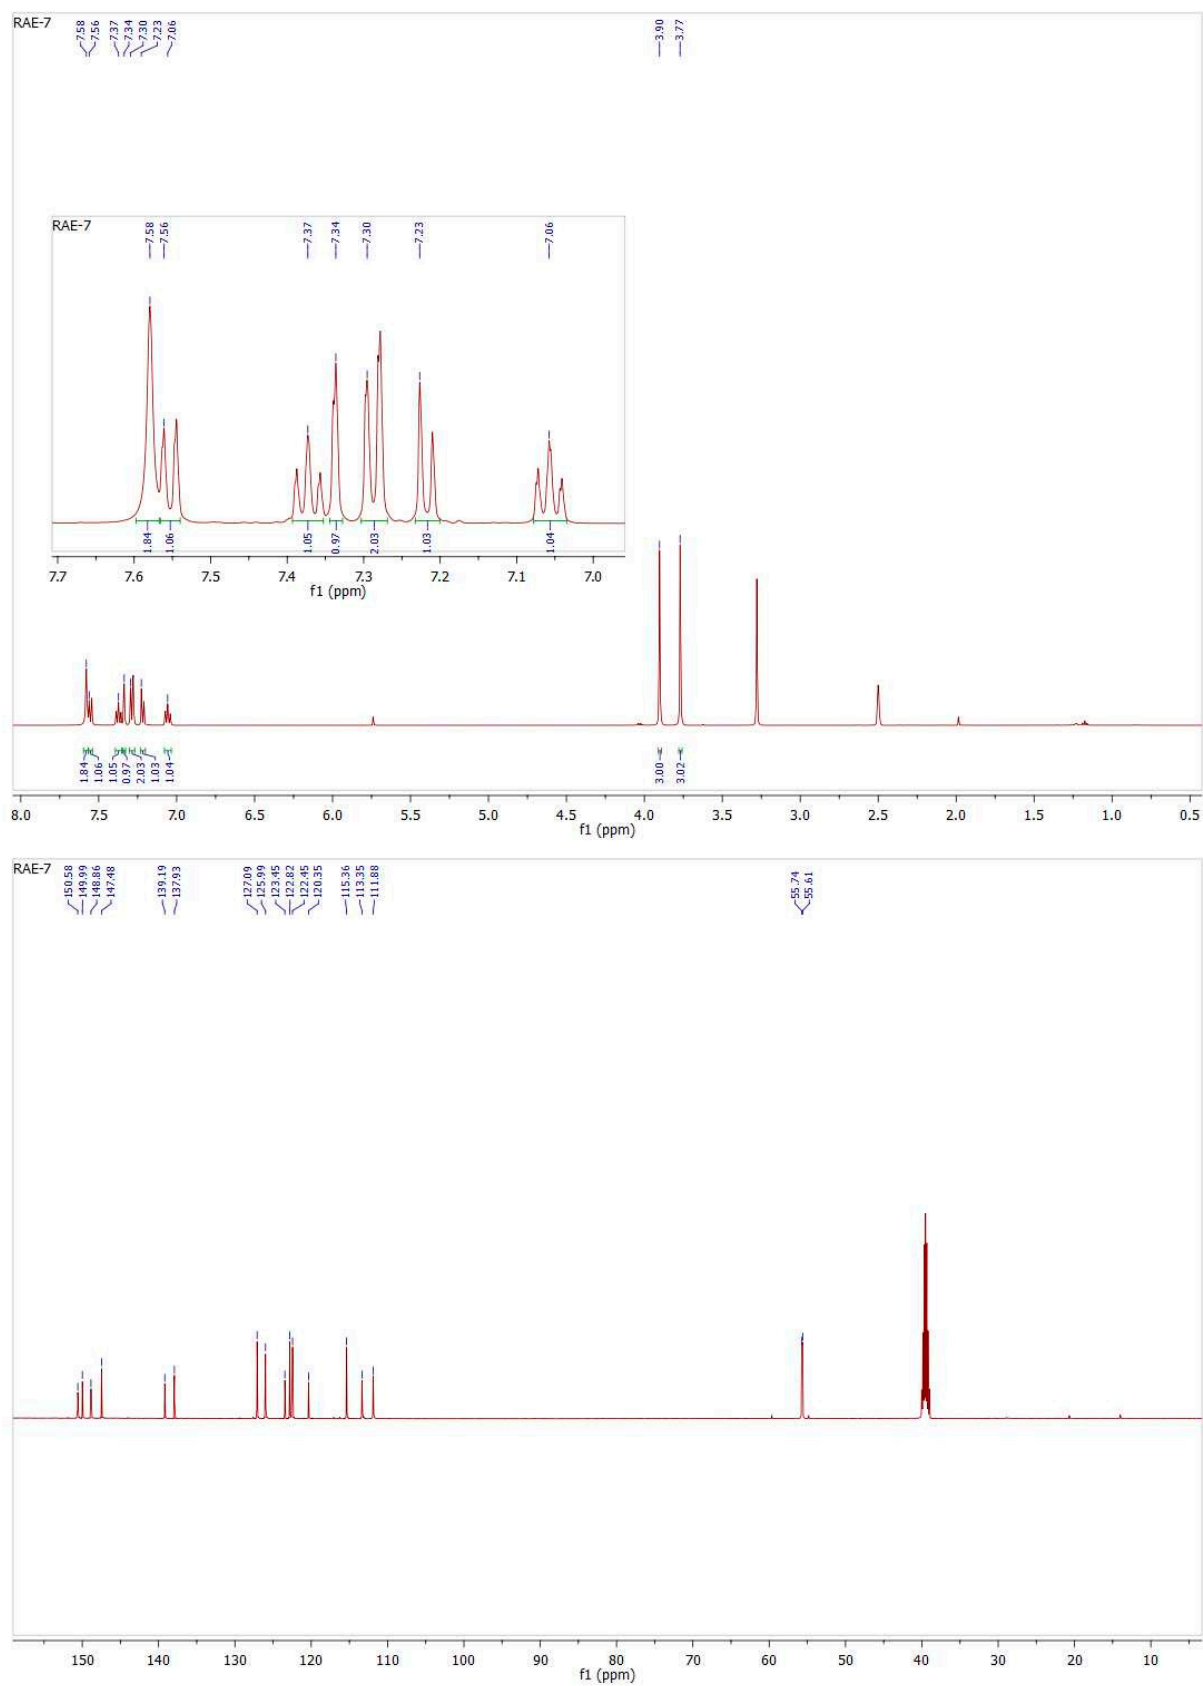



S35. 4-(4-(methylamino)-[1,2,4]triazolo[4,3-a]quinoxalin-1-yl)benzene-1,2-diol (**17a**).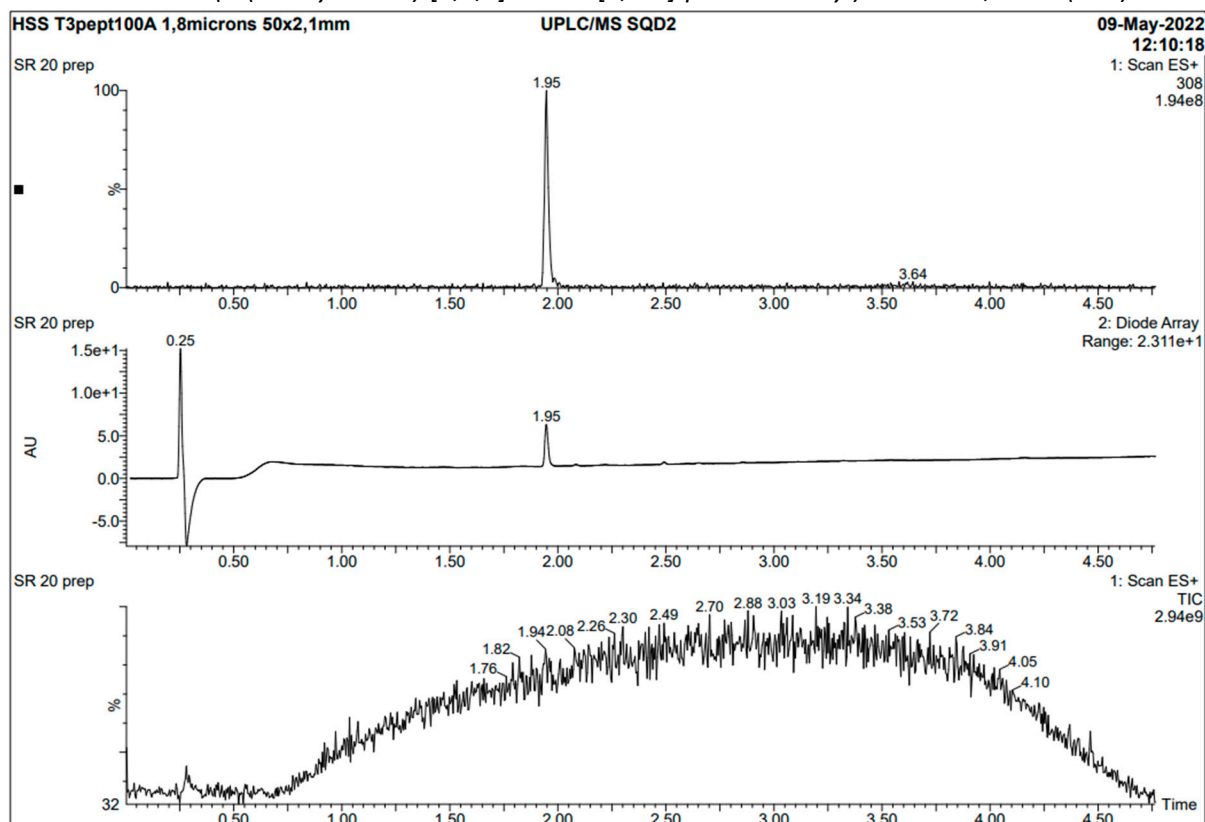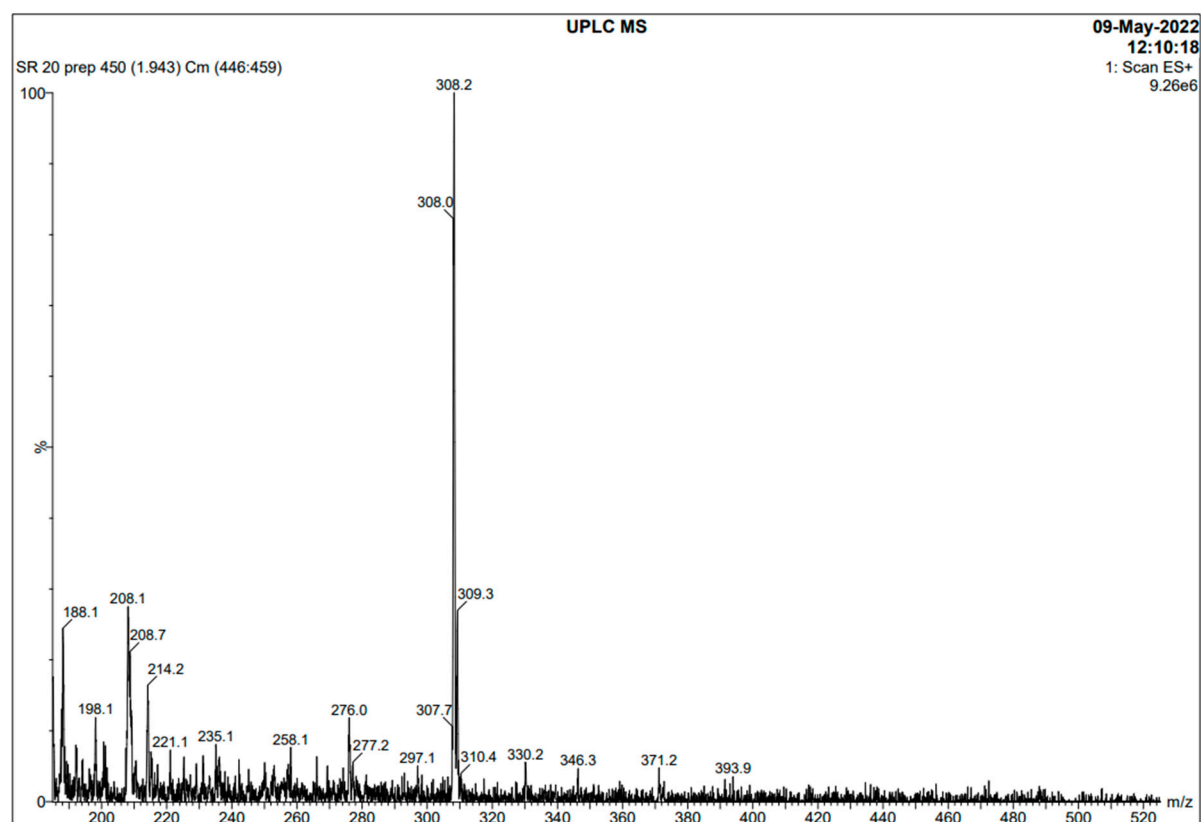

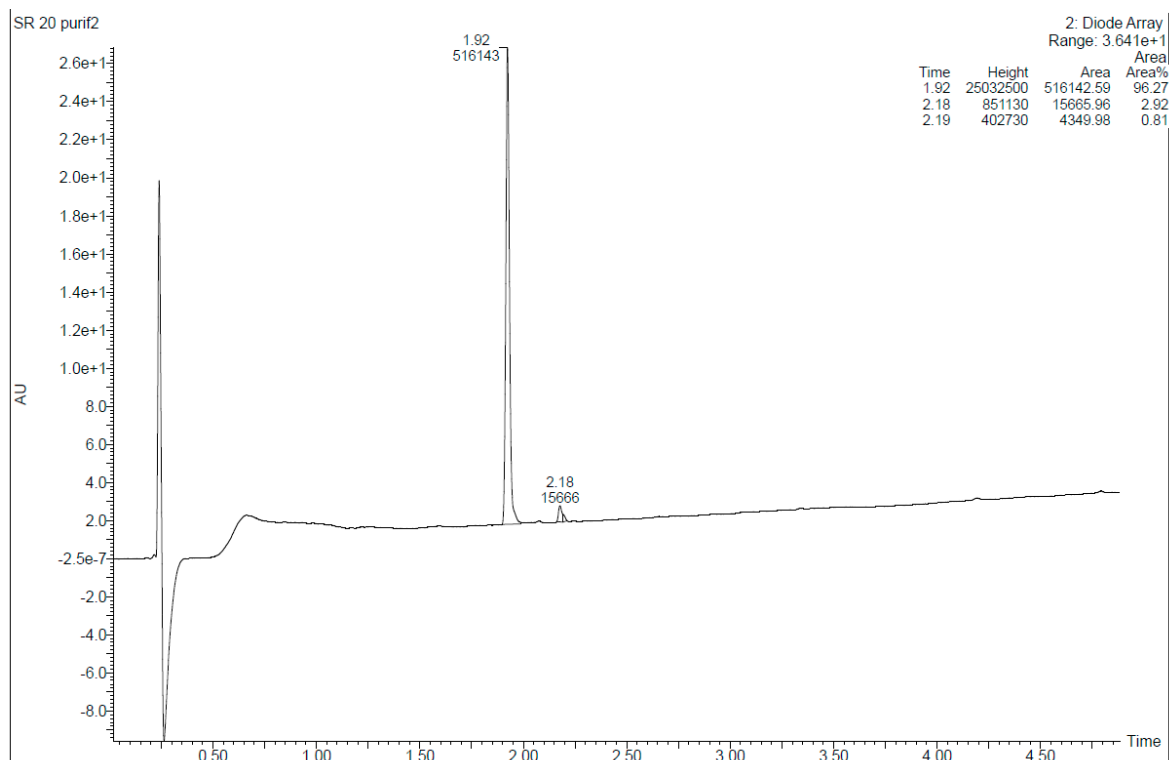

#### Acquisition Parameter

Source Type ESI Ion Polarity Positive Scan Begin 50 m/z Scan End 2200 m/z

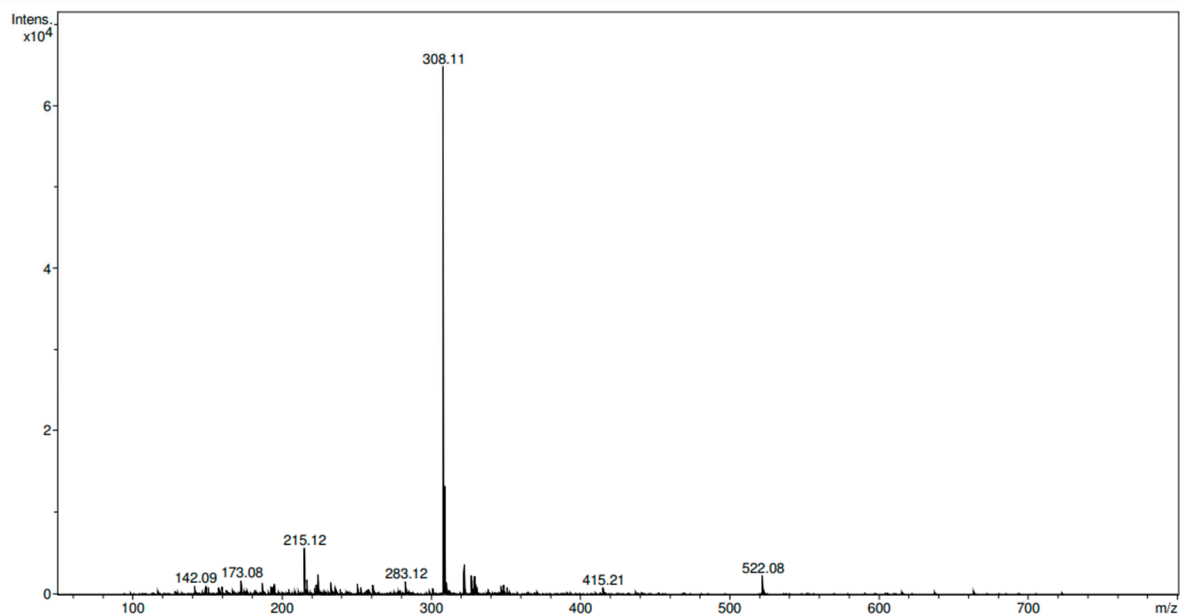



## Acquisition Parameter

Source Type ESI Ion Polarity Positive Scan Begin 50 m/z Scan End 2200 m/z

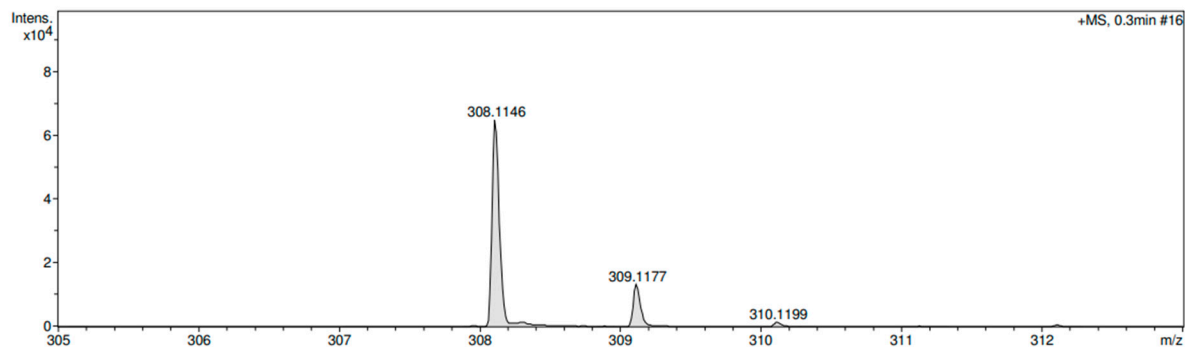

| Meas. m/z | # | Ion Formula | m/z      | err [ppm] | mSigma | # Sigma | Score  | rdB  | e <sup>-</sup> Conf | N-Rule |
|-----------|---|-------------|----------|-----------|--------|---------|--------|------|---------------------|--------|
| 308.1146  | 1 | C16H14N5O2  | 308.1142 | 1.3       | 6.6    | 1       | 100.00 | 12.5 | even                | ok     |

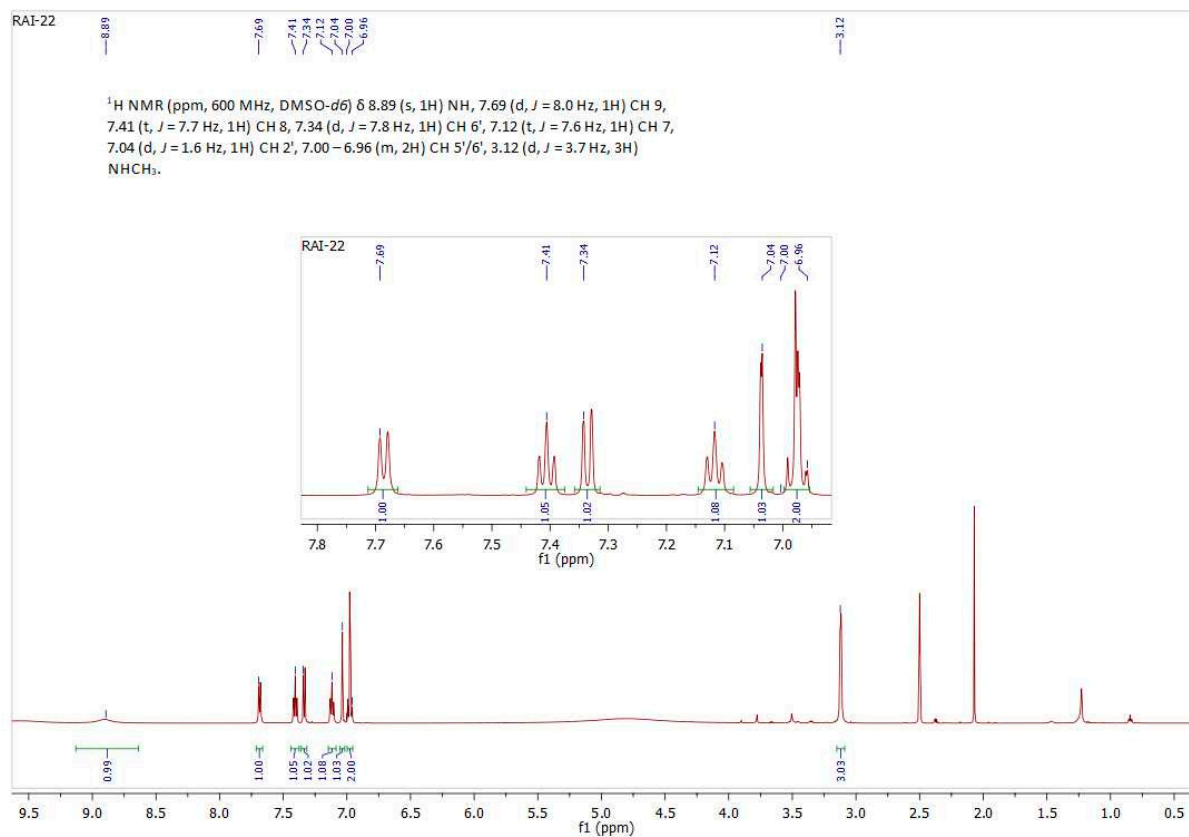

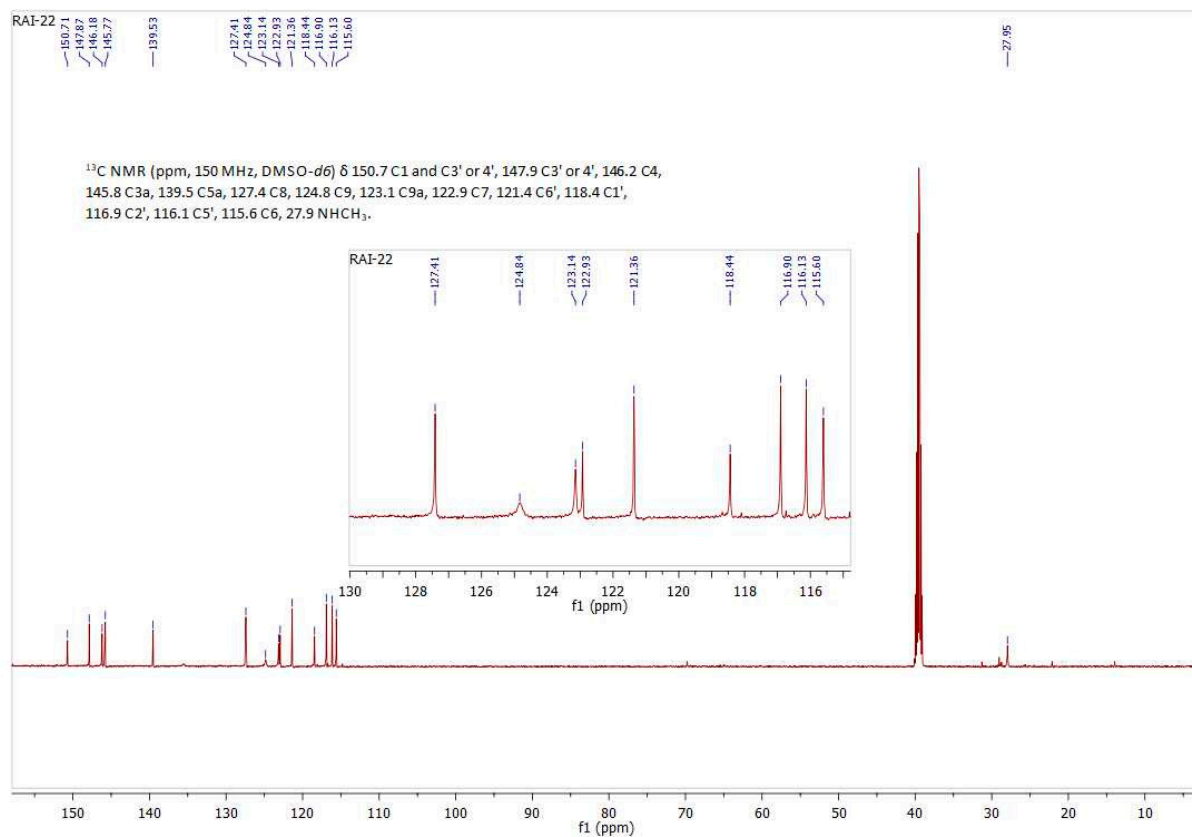

Supplement: s1 [file s1]
